# Supplementary material for: Serum N-terminal pro-B-type natriuretic peptide and cystatin C for acute kidney injury detection in critically ill adults in China: a prospective, observational study
Source: PubMed Central journal article supplement — BMJ Open. 2023 Jan 30;13(1):e063896. doi: 10.1136/bmjopen-2022-063896 (PMC9887693; doi:10.1136/bmjopen-2022-063896), 2023-01-30
Supplement: bmjopen-2022-063896.draft_revisions.pdf [file bmjopen-2022-063896.draft_revisions.pdf]

# BMJ Open

BMJ Open is committed to open peer review. As part of this commitment we make the peer review history of every article we publish publicly available.

When an article is published we post the peer reviewers' comments and the authors' responses online. We also post the versions of the paper that were used during peer review. These are the versions that the peer review comments apply to.

The versions of the paper that follow are the versions that were submitted during the peer review process. They are not the versions of record or the final published versions. They should not be cited or distributed as the published version of this manuscript.

BMJ Open is an open access journal and the full, final, typeset and author-corrected version of record of the manuscript is available on our site with no access controls, subscription charges or pay-per-view fees (<http://bmjopen.bmj.com>).

If you have any questions on BMJ Open's open peer review process please email [info.bmjopen@bmj.com](mailto:info.bmjopen@bmj.com)

# BMJ Open

## Serum N-terminal pro-B-type natriuretic peptide and cystatin C for acute kidney injury detection in critically ill adults: A prospective, observational study

|                               |                                                                                                                                                                                                                                                                                                                                                                                                                                                                                                                                                                                                                                                                                                                                                                                                                                                                                                                                                                                                                                                                                                                                                                                                                                                                                                                                                                                   |
|-------------------------------|-----------------------------------------------------------------------------------------------------------------------------------------------------------------------------------------------------------------------------------------------------------------------------------------------------------------------------------------------------------------------------------------------------------------------------------------------------------------------------------------------------------------------------------------------------------------------------------------------------------------------------------------------------------------------------------------------------------------------------------------------------------------------------------------------------------------------------------------------------------------------------------------------------------------------------------------------------------------------------------------------------------------------------------------------------------------------------------------------------------------------------------------------------------------------------------------------------------------------------------------------------------------------------------------------------------------------------------------------------------------------------------|
| Journal:                      | <i>BMJ Open</i>                                                                                                                                                                                                                                                                                                                                                                                                                                                                                                                                                                                                                                                                                                                                                                                                                                                                                                                                                                                                                                                                                                                                                                                                                                                                                                                                                                   |
| Manuscript ID                 | bmjopen-2022-063896                                                                                                                                                                                                                                                                                                                                                                                                                                                                                                                                                                                                                                                                                                                                                                                                                                                                                                                                                                                                                                                                                                                                                                                                                                                                                                                                                               |
| Article Type:                 | Original research                                                                                                                                                                                                                                                                                                                                                                                                                                                                                                                                                                                                                                                                                                                                                                                                                                                                                                                                                                                                                                                                                                                                                                                                                                                                                                                                                                 |
| Date Submitted by the Author: | 18-Apr-2022                                                                                                                                                                                                                                                                                                                                                                                                                                                                                                                                                                                                                                                                                                                                                                                                                                                                                                                                                                                                                                                                                                                                                                                                                                                                                                                                                                       |
| Complete List of Authors:     | Deng, Jia; Southern Medical University, The Second School of Clinical Medicine; The Second Hospital of Dalian Medical University, Critical Care Medicine<br>He, Linling; Guangdong Academy of Medical Sciences, Department of Intensive Care Unit of Cardiovascular Surgery; Guangdong Academy of Medical Sciences, Department of Critical Care Medicine<br>Liang, Yufan; Maoming People's Hospital, Department of Emergency; Guangdong Medical University<br>Hu, Linhui; Maoming People's Hospital, Department of Critical Care Medicine<br>Xu, Jing; Guangdong Academy of Medical Sciences, Department of Intensive Care Unit of Cardiovascular Surgery; Guangdong Academy of Medical Sciences, Department of Critical Care Medicine<br>Fang, Heng; Guangdong Academy of Medical Sciences, Department of Critical Care Medicine; Guangdong Academy of Medical Sciences, Department of Intensive Care Unit of Cardiovascular Surgery<br>Li, Ying; Guangdong Academy of Medical Sciences, Department of Critical Care Medicine; Guangdong Academy of Medical Sciences, Department of Intensive Care Unit of Cardiovascular Surgery<br>Chen, Chunbo; Guangdong General Hospital, Department of Critical Care Medicine; Guangdong Cardiovascular Institute, Guangdong General Hospital, Guangdong Academy of Medical Sciences, Department of Intensive Care Unit of Cardiac Surgery |
| Keywords:                     | Acute renal failure < NEPHROLOGY, Adult intensive & critical care < INTENSIVE & CRITICAL CARE, Nephrology < INTERNAL MEDICINE                                                                                                                                                                                                                                                                                                                                                                                                                                                                                                                                                                                                                                                                                                                                                                                                                                                                                                                                                                                                                                                                                                                                                                                                                                                     |

SCHOLARONE™  
Manuscripts

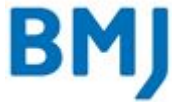

I, the Submitting Author has the right to grant and does grant on behalf of all authors of the Work (as defined in the below author licence), an exclusive licence and/or a non-exclusive licence for contributions from authors who are: i) UK Crown employees; ii) where BMJ has agreed a CC-BY licence shall apply, and/or iii) in accordance with the terms applicable for US Federal Government officers or employees acting as part of their official duties; on a worldwide, perpetual, irrevocable, royalty-free basis to BMJ Publishing Group Ltd ("BMJ") its licensees and where the relevant Journal is co-owned by BMJ to the co-owners of the Journal, to publish the Work in this journal and any other BMJ products and to exploit all rights, as set out in our [licence](#).

The Submitting Author accepts and understands that any supply made under these terms is made by BMJ to the Submitting Author unless you are acting as an employee on behalf of your employer or a postgraduate student of an affiliated institution which is paying any applicable article publishing charge ("APC") for Open Access articles. Where the Submitting Author wishes to make the Work available on an Open Access basis (and intends to pay the relevant APC), the terms of reuse of such Open Access shall be governed by a Creative Commons licence – details of these licences and which [Creative Commons](#) licence will apply to this Work are set out in our licence referred to above.

Other than as permitted in any relevant BMJ Author's Self Archiving Policies, I confirm this Work has not been accepted for publication elsewhere, is not being considered for publication elsewhere and does not duplicate material already published. I confirm all authors consent to publication of this Work and authorise the granting of this licence.

**Title****Serum N-terminal pro-B-type natriuretic peptide and cystatin C for acute kidney injury detection in critically ill adults: A prospective, observational study**

Jia Deng<sup>1,2,3†</sup>, Linling He<sup>2,4,5†</sup>, Yufan Liang<sup>6,7†</sup>, Linhui Hu<sup>8†</sup>, Jing Xu<sup>2,4</sup>, Heng Fang<sup>2,4</sup>, Ying Li<sup>2,4</sup>, Chunbo Chen<sup>1,2,4,9\*</sup>

1. The Second School of Clinical Medicine, Southern Medical University, Guangzhou 510515, Guangdong, China

2. Department of Critical Care Medicine, Guangdong Provincial People's Hospital, Guangdong Academy of Medical Sciences, 106 Zhongshan Er Road, Guangzhou 510080, Guangdong, China.

3. Department of Critical Care Medicine, The Second Hospital of Dalian Medical University, Dalian 116023, Liaoning, China

4. Department of Intensive Care Unit of Cardiovascular Surgery, Guangdong Cardiovascular Institute, Guangdong Provincial People's Hospital, Guangdong Academy of Medical Sciences, Laboratory of South China Structural Heart Disease, 96 Dongchuan Road, Guangzhou 510080, Guangdong, China.

5. Shantou University Medical College, Shantou 515063, Guangdong, China.

6. Department of Emergency, Maoming People's Hospital, 101 Weimin Road, Maoming 525000, Guangdong, China.

7. Guangdong Medical University, Zhanjiang 524023, Guangdong, China

8. Department of Critical Care Medicine, Maoming People's Hospital, 101 Weimin Road, Maoming 525000, Guangdong, China.

9. National Clinical Research Center for Kidney Disease, State Key Laboratory of Organ Failure Research, Nanfang Hospital, Southern Medical University, Guangzhou 510515, Guangdong, China.

1  
2  
3  
4  
5  
6 \* Corresponding author:  
7

8  
9 Chunbo Chen

10  
11 Department of Intensive Care Unit of Cardiovascular Surgery, Guangdong  
12  
13 Cardiovascular Institute, Guangdong Provincial People's Hospital, Guangdong  
14  
15 Academy of Medical Sciences, 96 Dongchuan Road, Guangzhou 510080, Guangdong  
16  
17 Province, People's Republic of China.  
18  
19

20  
21  
22 Email: [gghccm@163.com](mailto:gghccm@163.com)  
23  
24  
25

26  
27 † Jia Deng, Linling He, Yufan Liang and Linhui Hu these authors contributed equally  
28  
29 to this study, Co-first author.  
30  
31

32  
33 1 The Second School of Clinical Medicine, Southern Medical University, Guangzhou  
34  
35 510515, Guangdong, China  
36  
37  
38  
39

40 Email addresses for all authors:

41  
42  
43 Jia Deng: [dengjia19881001@126.com](mailto:dengjia19881001@126.com)  
44

45  
46 Linling He: [906928457@qq.com](mailto:906928457@qq.com)  
47

48  
49 Yufan Liang: [yufan1524@163.com](mailto:yufan1524@163.com)  
50

51  
52 Linhui Hu: [hulinhui@live.cn](mailto:hulinhui@live.cn)

53  
54 Jing Xu: [xjxiaodaifu@163.com](mailto:xjxiaodaifu@163.com)  
55

56  
57 Heng Fang: [1330928862@qq.com](mailto:1330928862@qq.com)

58  
59 Ying Li: [572257002@qq.com](mailto:572257002@qq.com)  
60

Chunbo Chen: gghccm@163.com

For peer review only

1  
2  
3  
4  
5  
6  
7  
8  
9  
10  
11  
12  
13  
14  
15  
16  
17  
18  
19  
20  
21  
22  
23  
24  
25  
26  
27  
28  
29  
30  
31  
32  
33  
34  
35  
36  
37  
38  
39  
40  
41  
42  
43  
44  
45  
46  
47  
48  
49  
50  
51  
52  
53  
54  
55  
56  
57  
58  
59  
60

## Abstract

**Objective** Serum N-terminal pro-B-type natriuretic peptide (NT-proBNP) and cystatin C (sCysC) are available clinically and beneficial in diagnosing AKI. Our purpose is to identify the performance of their combined diagnosis for AKI in critically ill patients.

**Design** A prospectively-recruited, observational study was performed.

**Setting** Adults admitted to the intensive care unit of a grade A tertiary hospital in China.

**Participants** A total of 1222 critically ill patients were enrolled in the study.

**Main outcome measures** To identify the performance of the combined diagnosis of serum NT-proBNP and sCysC for AKI in critically ill patients. The area under the receiver operating characteristic curve (AUC-ROC), category-free net reclassification index (NRI), and incremental discrimination improvement (IDI) were utilized for comparing the discriminative powers of NT-proBNP, sCysC and their combination for diagnosing AKI with or without a clinical model.

## Results

AKI was detected in 256 out of 1222 included patients (20.9%). AUC-ROC for NT-proBNP plus sCysC panel to detect AKI had a significantly higher accuracy than any individual biomarker ( $P < 0.05$ ). After multivariate adjustment, a level of serum NT-proBNP  $\geq 204$  pg/mL was associated with 3.5-fold higher odds for AKI compared with that below the cutoff value. Similar results were obtained for sCysC levels ( $P < 0.001$ ). To detect AKI, adding NT-proBNP and sCysC to a clinical model further increased the AUC-ROC to 0.859 beyond that of the clinical model with or without sCysC ( $P < 0.05$ ). Moreover, the addition of this panel to the clinical model significantly augmented risk

1  
2  
3  
4 reclassification of AKI beyond that of the clinical model alone or with single biomarker  
5  
6 ( $P < 0.05$ ), as measured by NRI and IDI.  
7  
8

### 9 **Conclusions**

10  
11 In critically ill individuals, serum NT-proBNP, sCysC, and clinical risk factor  
12  
13 combination improve the discriminative power for diagnosing AKI.  
14  
15  
16

### 17 **Keywords**

18  
19 Acute kidney injury, N-terminal pro-B-type natriuretic peptide, Serum cystatin C,  
20  
21  
22 Intensive care unit  
23  
24  
25  
26  
27  
28  
29  
30  
31  
32  
33  
34  
35  
36  
37  
38  
39  
40  
41  
42  
43  
44  
45  
46  
47  
48  
49  
50  
51  
52  
53  
54  
55  
56  
57  
58  
59  
60



### Strengths and limitations of this study

This is the first study to identify the performance of serum NT-proBNP and sCysC combined diagnosis in detecting AKI.

This prospectively-recruited, observational study was of a long duration and had an adequate sample size.

A limitation of this study was that the relationship between NT-proBNP and sCysC could not be dynamically assessed because we only measured their levels at the time of admission.

□

## Introduction

Acute kidney injury (AKI) is a predominant clinical syndrome affecting more than 50% of patients who underwent treatment at intensive care unit (ICU)<sup>[1-3]</sup>. Increased morbidity, mortality, hospitalization length, and cost are extremely related to AKI<sup>[4-6]</sup>, so AKI early recognition is critical to guiding management. Urine production and serum creatinine were employed as diagnostic criteria for AKI in accordance with the recommendations of Kidney Disease Improving Global Outcomes (KDIGO) guidelines<sup>[7]</sup>. Changes in sCr or urine production cannot recognize early renal tubular injury prior to a reduction in glomerular filtration rate<sup>[8,9]</sup>. Therefore, early and reliable AKI biomarkers are necessary to promote timely intervention and minimize complications. However, it is impossible for an individual biomarker to adequately evaluate the risk of AKI as a complex multifactorial syndrome<sup>[3,10]</sup>. Combining diverse biomarkers in a clinical model evaluation could enhance early detection of AKI in critically ill patients<sup>[5,11,12]</sup>.

A hemodynamic marker stress, N-terminal pro-B-type natriuretic peptide (NT-proBNP), has recently received attention as a potential predictor of AKI in a wide diversity of clinical settings<sup>[13-17]</sup>. High serum NT-proBNP level reflects hemodynamic instability, myocardial wall stress, myocardial ischemia, volume overload, sympathetic nervous system and renin-angiotensin-aldosterone system activation, all of which may contribute to AKI incidence<sup>[18-20]</sup>. However, there are finite data on clinical use of NT-proBNP for detecting AKI among critically ill patients.

Serum Cystatin C (sCysC), a 122-amino acid low-molecular-weight protein (13 kDa),

1  
2  
3  
4 is a marker of glomerular filtration<sup>[9]</sup>. CysC has a half-life of about one-third that of  
5  
6 sCr, causing CysC to reach homeostasis three times faster. These properties promote  
7  
8 sCysC as an alternative marker of renal function<sup>[8]</sup>. To date, sCysC has been displayed  
9  
10 to be conducive for the early identification of all-cause AKI<sup>[21]</sup>.  
11  
12  
13

14 Although serum NT-proBNP and sCysC are mainly used for the prognosis  
15  
16 assessment of heart disease and the prediction of acute cardiac events with AKI <sup>[22-26]</sup>,  
17  
18 the diagnostic accuracy of their combination for AKI in ICU remains unknown. We  
19  
20 performed a prospective study in the present research to evaluate the performance of  
21  
22 serum NT-proBNP and sCysC at ICU admission, both independently and in  
23  
24 combination, for AKI determination among critically ill adults.  
25  
26  
27  
28  
29  
30  
31  
32  
33  
34  
35  
36  
37  
38  
39  
40  
41  
42  
43  
44  
45  
46  
47  
48  
49  
50  
51  
52  
53  
54  
55  
56  
57  
58  
59  
60

## Methods

### Study design and participants

At Guangdong Provincial People's Hospital in China, a tertiary care hospital, a prospectively recruited observational research was performed in a mixed medical-surgical ICU. From December 2016 to December 2017, we consecutively enrolled patients aged 18 and up in a row. Pregnancy, renal replacement therapy (RRT) prior to ICU admittance, nephrectomy, end-stage renal disease (ESRD), renal transplant, rejection of consent, or missing admission information were all exclusion criteria. The study protocol strengthened the reporting requirements of observational studies in epidemiology<sup>[27]</sup> and standards for the reporting of diagnostic accuracy<sup>[28]</sup>. This study protocol was authorized by ethics committee of Guangdong Provincial People's Hospital. Additionally, all procedures were carried out consistent with applicable regulations and guidelines. All patients provided written informed consent.

### Data collection

Clinical baseline data were collected prospectively. Within 1 h following ICU admission, blood samples were collected contemporaneously to determine sCr, serum NT-proBNP, and sCysC. Within 24 h after collection, all samples were analyzed in the Guangdong Provincial People's Hospital central laboratory utilizing standard protocol. When a patient is admitted to the ICU, sCr was measured and subsequently done at least once a day until discharge as part of routine clinical care. Throughout admission to ICU, urine production was also been recorded. We evaluated the following clinical variables: age, gender, body mass index (BMI), preexisting clinical conditions, sepsis,

1  
2  
3  
4 admission type, baseline sCr, baseline estimated glomerular filtration rate (eGFR),  
5  
6 Acute Physiology and Chronic Health Evaluation (APACHE) II score, ICU mortality,  
7  
8 in-hospital mortality, duration of ICU admittance, length of hospitalization, ICU costs,  
9  
10 and total costs. The outcome was the incidence of AKI following ICU enrollment  
11  
12 within 1 week. To calculate eGFR, we employed the Chronic Kidney Disease  
13  
14 Epidemiology Collaboration (CKD-EPI) creatinine equation [29].  
15  
16  
17  
18

### 19 **Definitions**

20  
21  
22 The KDIGO classification criteria were utilized to define AKI: as a rise in sCr  
23  
24 by  $\geq 0.3$  mg/dL (26.5 $\mu$ mol/L) within 48 h or a rise in sCr to  $\geq 1.5$  times the  
25  
26 baseline within 1 week, or urine output  $< 0.5$  mL/kg/h for 6 h after ICU  
27  
28 admission<sup>[7]</sup>.  
29  
30  
31

32  
33 Relying on following principles, ranked in descending order of preference, a  
34  
35 baseline sCr was affirmed<sup>[30]</sup>: (1) prior to ICU admittance, the most recent pre-  
36  
37 ICU value between 30 and 365 days; (2) a stable pre-ICU value  $> 365$  days prior  
38  
39 to ICU admittance for patients  $< 40$  years of age (stable definition is being within  
40  
41 15% of the lowest ICU measurement); (3) pre-ICU value  $> 365$  days prior to  
42  
43 ICU admittance and lower than the initial sCr at ICU admission; (4) a pre-ICU  
44  
45 value (within 3 and 39 days prior to ICU admittance) lower than or equal to the  
46  
47 initial sCr upon ICU admittance not obviously during AKI; (5) the least sCr  
48  
49 value obtained at initial ICU admittance, the most recent ICU value, or the  
50  
51 lowest value achieved to a 365-day follow up.  
52  
53  
54  
55  
56  
57

### 58 **Biomarker measurement**

1  
2  
3  
4 The levels of sCysC and sCr were quantified through the UniCel DxC 800 Synchron  
5  
6 system usage in compliance with the manufacturer's instructions (Beckman Coulter,  
7  
8 Brea, CA, USA). For sCysC, the intra- and inter-assay variation coefficients were 10%  
9  
10 and 5%, respectively. Levels of serum NT-proBNP were quantified through an  
11  
12 electrochemiluminescence immunoassay employing a Cobas® e602 system usage  
13  
14 (Roche Diagnostics, Germany). For NT-proBNP, the uppermost limit of normal for  
15  
16 those who seem to be healthy (95th percentage) has been 125 pg/mL. The coefficient  
17  
18 of interassay variation for NT-proBNP was < 5%. Each patient's clinical features were  
19  
20 blinded to the personnel measuring the biomarkers.  
21  
22  
23  
24  
25

### 26 27 **Patient and public involvement**

28  
29 Patients were not involved in the study.  
30  
31

### 32 33 **Statistical analysis**

34  
35 For statistical analyses, we utilized SPSS version 21.0 (SPSS, Chicago, IL, USA),  
36  
37 MedCalc version 18.2.1 (MedCalc Software, Ostend, Belgium) and R version 4.1.1 (R  
38  
39 Foundation for Statistical Computing, Vienna, Austria). The mean  $\pm$  standard deviation  
40  
41 or median had been utilized to express continuous variables (25th to 75th percentage,  
42  
43 interquartile range). Numbers (percent) were utilized to represent categorical variables.  
44  
45  
46 For nonnormally distributed continuous variables, the Wilcoxon rank-sum test was  
47  
48 employed for intergroup difference measurement, and for categorical variables, the chi-  
49  
50 square or Fisher's exact test was deployed.  
51  
52  
53

54  
55  
56 NT-proBNP concentrations were extremely skewed and therefore were log<sub>10</sub>  
57  
58 transformed before inclusion in the models. Areas under the receiver operating  
59  
60

1  
2  
3  
4 characteristic curves (AUC-ROCs) were computed. The method exploited by DeLong  
5  
6 et al. was used to compare AUC-ROCs between groups<sup>[31]</sup>. The biomarkers' sensitivity,  
7  
8 specificity, positive and negative predictive values, positive and negative likelihood  
9  
10 ratios of the biomarkers were calculated. Youden's index for AKI detection identified  
11  
12 the optimal cutoff values for individual biomarkers and their combination<sup>[32]</sup>.  
13  
14

15  
16  
17 Logistic analysis was utilized to compute the odds ratios (ORs) and 95% confidence  
18  
19 intervals for each factor: to identify the independent risk factors of AKI, the clinical  
20  
21 variables with  $P < 0.10$  in univariate analysis were incorporated into the multivariate  
22  
23 logistic model. A forward stepwise method was used to select variables. We categorized  
24  
25 NT-proBNP and sCysC levels according to their cutoff values and then performed  
26  
27 logistic regression on the created variables. We conducted multiple logistic regression  
28  
29 analyses to calculate the adjusted ORs of AKI. The selection of covariates for the  
30  
31 adjusted models was based on the clinical risk factors that detect AKI.  
32  
33  
34  
35  
36

37  
38 The performance of AKI detection after adding NT-proBNP and sCysC, or any of  
39  
40 them, into the clinical model as categorical variables was assessed by AUC-ROC,  
41  
42 category-free net reclassification improvement (NRI) index and integrated  
43  
44 discrimination improvement (IDI) index, as described previously<sup>[33, 34]</sup>. All the tests  
45  
46 were 2-tailed, and  $P < 0.05$  was regarded statistically significant.  
47  
48  
49  
50  
51  
52  
53  
54  
55  
56  
57  
58  
59  
60

## Results

### Clinical data and outcomes

A total of 150 (10.9 %) of the 1372 adult patients enrolled in the study were excluded (Figure 1). Therefore, 1222 patients were enrolled and AKI occurred in 256 patients (20.9%). Patient baseline variables and outcomes are exhibited in Table 1. In comparison to patients without AKI, patients with AKI were elderly and were observed more frequently in those with comorbidities, including chronic kidney disease (CKD), hypertension, coronary artery disease (CAD), diabetes mellitus (DM), heart failure (HF), cerebrovascular disease and chronic obstructive pulmonary disease (COPD). Increased sCr, serum NT-proBNP and sCysC levels at admission, as well as increased APACHE II scores, were more prevalent in AKI patients. The baseline sCr and eGFR did not show significant differences between the two groups.

Indeed, AKI patients had a higher risk of adverse outcomes, a higher percentage of ICU and in-hospital mortality, higher expenses, a longer hospitalization duration, and a longer stay in ICU ( $P < 0.001$ ) compared to those without AKI.

### Detective abilities of the two biomarkers for AKI

To demonstrate the ability of these biomarkers for AKI detection, we used AUC-ROCs to calculate the two biomarkers, respectively, and in combination. AUC-ROCs for NT-proBNP and sCysC were computed for AKI detection (0.821 and 0.766, respectively). For AKI detection, NT-proBNP had a sensitivity of 78% and a specificity of 75%, while sCysC had high specificity but limited sensitivity. The cutoff values for NT-proBNP and sCysC were 204 pg/mL and 1.02 mg/L, respectively, yielding good sensitivity and specificity. The AUC-ROCs for AKI presented a better performance by NT-proBNP plus sCysC than by any individual biomarker ( $P < 0.05$ , Table 2 and Figure 2).



### **Multivariate logistic regression analyses of the two biomarkers for AKI detection**

We stratified patients based on the two cutoff values of serum NT-proBNP and sCysC levels into two categories, respectively. Compared with those with serum NT-proBNP < 204 pg/mL, patients with serum NT-proBNP  $\geq$  204 pg/mL on admission exhibited a higher incidence of AKI (7.2% versus 45.1%,  $P < 0.001$ ). AKI was found to have higher incidence (46.5%) in patients with sCysC  $\geq$  1.02 mg/L compared to those with sCysC < 1.02 mg/L (10.2%) ( $P < 0.001$ ). Following clinical variables adjustment (including CKD, HF, sepsis, admission type, sCr at admission, and APACHE II scores, Table 3), a level of serum NT-proBNP  $\geq$  204 pg/mL was associated with 3.5-fold higher odds for AKI compared with NT-proBNP level below the cutoff value ( $P < 0.001$ ). Similarly, patients with sCysC  $\geq$  1.02 mg/L were linked to 2.6-fold greater odds of AKI compared to those with sCysC < 1.02 mg/L ( $P < 0.001$ ) (Table 4).

### **Discrimination and reclassification of the combination of biomarkers and clinical models for AKI**

Considering the effect of adding NT-proBNP and sCysC, or any of them, to a clinical model as categorical variables for AKI detection, logistic regression analysis was employed. On ICU admittance for AKI diagnosis, potential available variables including age, sepsis, admission type, sCr, and APACHE II scores as well as comorbidities, including hypertension, DM, CKD, cerebrovascular disease, COPD, CAD, and HF were considered. The clinical model for detecting AKI involved CKD, HF, sepsis, admission type, sCr at admission, and APACHE II scores (Table 3).

To evaluate the enhancement of discriminative capacity, a panel of NT-proBNP plus sCysC was introduced to the above-mentioned model. As shown in Table 5, compared with the clinical

1  
2  
3  
4 model, the addition of NT-proBNP to the clinical model had a higher AUC-ROC ( $P < 0.05$ ),  
5  
6 and no statistically significant variation existed when sCyC was added to the clinical model.  
7  
8  
9 However, the risk reclassification was markedly improved through the addition of NT-proBNP  
10  
11 or sCyC to the clinical model, as measured by category-free NRI and IDI ( $P < 0.05$ ). Adding  
12  
13 NT-proBNP and sCysC to a clinical model for AKI detection further increased the AUC-ROC  
14  
15 to 0.859 beyond that of the clinical model with or without sCysC ( $P < 0.05$ ) (Figure 3).  
16  
17 Moreover, this panel addition to the clinical model significantly enhanced the risk  
18  
19 reclassification of AKI beyond that of the clinical model with or without any individual  
20  
21 biomarkers ( $P < 0.05$ ), with maximum NRI (0.531) and IDI (0.038).  
22  
23  
24  
25  
26  
27  
28  
29  
30  
31  
32  
33  
34  
35  
36  
37  
38  
39  
40  
41  
42  
43  
44  
45  
46  
47  
48  
49  
50  
51  
52  
53  
54  
55  
56  
57  
58  
59  
60

**Table 1** Clinical data and outcomes

| Characteristics                              | Total (n=1222)            | AKI (n=256)                 | No AKI (n=966)            | P value |
|----------------------------------------------|---------------------------|-----------------------------|---------------------------|---------|
| Age, years                                   | 57 (45-67)                | 63.5 (52-72)                | 55 (44-65)                | <0.001  |
| Male, n (%)                                  | 666 (54.5)                | 151 (59.0)                  | 515 (53.3)                | 0.105   |
| BMI, kg/m <sup>2</sup>                       | 22 (19.6-24.7)            | 22.3 (19.9-25.0)            | 21.9 (19.6-24.6)          | 0.395   |
| <b>Preexisting clinical conditions</b>       |                           |                             |                           |         |
| Hypertension, n (%)                          | 252 (20.6)                | 81 (31.6)                   | 171 (17.7)                | <0.001  |
| Diabetes mellitus, n (%)                     | 121 (9.9)                 | 52 (20.3)                   | 69 (7.1)                  | <0.001  |
| Chronic kidney disease, n (%)                | 26 (2.1)                  | 21 (8.2)                    | 5 (0.5)                   | <0.001  |
| Cerebrovascular disease, n (%)               | 127 (10.4)                | 50 (19.5)                   | 77 (8.0)                  | <0.001  |
| Chronic obstructive pulmonary disease, n (%) | 35 (2.9)                  | 18 (7.0)                    | 17 (1.8)                  | <0.001  |
| Coronary artery disease, n (%)               | 53 (4.3)                  | 24 (9.4)                    | 29 (3.0)                  | <0.001  |
| Heart failure, n (%)                         | 31 (2.5)                  | 22 (8.6)                    | 9 (0.9)                   | <0.001  |
| Cancer, n (%)                                | 227 (18.6)                | 50 (19.5)                   | 177 (18.3)                | 0.659   |
| Sepsis, n (%)                                | 98 (8.0)                  | 70 (27.3)                   | 28 (2.9)                  | <0.001  |
| <b>Admission type, n (%)</b>                 |                           |                             |                           |         |
| Elective surgical, n (%)                     | 863 (70.6)                | 84 (32.8)                   | 779 (80.6)                | <0.001  |
| Emergency surgical, n (%)                    | 83 (6.8)                  | 33 (12.9)                   | 50 (5.2)                  | <0.001  |
| Medical, n (%)                               | 276 (22.6)                | 139 (54.3)                  | 137 (14.2)                | <0.001  |
| Baseline serum creatinine, mg/dL             | 0.78 (0.64-0.96)          | 0.76 (0.58-1.09)            | 0.79 (0.65-0.94)          | 0.949   |
| Baseline eGFR, mL/min/1.73 m <sup>2</sup>    | 119.4 (97.6-145.4)        | 122.9 (83.3-158.7)          | 118.7 (100.4-142.9)       | 0.950   |
| <b>Parameters at ICU admission</b>           |                           |                             |                           |         |
| Cr, mg/dl                                    | 0.87 (0.72-1.07)          | 0.97 (0.72-1.55)            | 0.85 (0.72-1.02)          | <0.001  |
| NT-proBNP, pg/mL                             | 97.1 (29.4-464.4)         | 871.0 (225.8-2919.3)        | 66.2 (23.7-206.2)         | <0.001  |
| sCysC, mg/L                                  | 0.78 (0.61-1.06)          | 1.15 (0.83-1.85)            | 0.75 (0.58-0.94)          | <0.001  |
| APACHE II score                              | 7 (4-10)                  | 11 (8-16)                   | 6 (4-9)                   | <0.001  |
| UP, ml/kg/h                                  | 1.67 (1.20-2.26)          | 1.37 (0.89-2.20)            | 1.73 (1.26-2.27)          | <0.001  |
| <b>Outcomes</b>                              |                           |                             |                           |         |
| ICU mortality, n (%)                         | 40 (3.3)                  | 33 (12.9)                   | 7 (0.7)                   | <0.001  |
| In-hospital mortality, n (%)                 | 53 (4.3)                  | 40 (15.6)                   | 13 (1.3)                  | <0.001  |
| ICU stay, days                               | 2 (2-4)                   | 6 (3-13.3)                  | 2 (2-3)                   | <0.001  |
| Hospital stay, days                          | 16 (12-23)                | 22 (13-33.3)                | 15 (11-21)                | <0.001  |
| ICU costs, CNY                               | 39461.7 (28966.2-59437.2) | 66140.1 (36526.0-131843.8)  | 37667.5 (27881.5-48238.4) | <0.001  |
| Total costs, CNY                             | 58295.3 (44201.6-98602.8) | 128945.6 (71506.8-199685.4) | 52773.8 (40856.2-78718.9) | <0.001  |

Abbreviations: AKI, acute kidney injury; BMI, body mass index; eGFR, estimated glomerular filtration rate; ICU, intensive care unit; sCr, serum creatinine, NT-proBNP, N-terminal pro-B-type natriuretic peptide; sCysC, serum cystatin C; APACHE II score, acute physiology and chronic health evaluation II score; UP, Urine production first 24 h after admission; CNY, Chinese yuan.

Continuous variables are expressed as mean  $\pm$  standard deviation or median (25th to 75th percentile, interquartile range). Categorical variables are expressed as a n (%).

**Table 2** Detective characteristics of the two biomarkers for AKI

| Logistic regression models | AUC-ROC <sup>a</sup> (95%CI)     | Cutoff <sup>b</sup> | Sensitivity | Specificity | (+) LR | (-) LR | PPV  | NPV  |
|----------------------------|----------------------------------|---------------------|-------------|-------------|--------|--------|------|------|
| sCysC                      | 0.766 (0.741-0.789)              | 1.02 mg/L           | 0.66        | 0.80        | 3.28   | 0.43   | 0.47 | 0.90 |
| NT-proBNP                  | 0.821 (0.799-0.842) <sup>c</sup> | 204.00 pg/mL        | 0.78        | 0.75        | 3.12   | 0.29   | 0.45 | 0.93 |
| NT-proBNP+ sCysC           | 0.832 (0.809-0.852) <sup>d</sup> | 0.15 <sup>e</sup>   | 0.84        | 0.69        | 2.69   | 0.23   | 0.42 | 0.94 |

Abbreviations: AKI, acute kidney injury; AUC-ROC, area under the receiver operating characteristic curve; CI, confidence interval; (+) LR, Positive likelihood ratio; (-) LR, negative likelihood ratio; PPV, Positive predictive value; NPV, Negative predictive value; sCysC, Serum cystatin C; NT-proBNP, N-terminal pro-B-type natriuretic peptide.

<sup>a</sup> Values are presented as AUC-ROC (95% CI)

<sup>b</sup> Ideal cutoff value according to Youden's index

<sup>c</sup>  $P < 0.05$  vs. sCysC

<sup>d</sup>  $P < 0.05$  vs. NT-proBNP, sCysC

<sup>e</sup> Cutoff points of the biomarker panels were the predicted probabilities generated from the multiple logistic regression model

**Table 3** Logistic analyses of clinical risk factors for AKI detection

| Variables                             | Univariate analysis   |                | Multivariate model   |                |
|---------------------------------------|-----------------------|----------------|----------------------|----------------|
|                                       | OR (95% CI)           | <i>P</i> value | OR (95% CI)          | <i>P</i> value |
| Age                                   | 1.029 (1.019-1.038)   | <0.001         |                      |                |
| Hypertension                          | 2.152 (1.577-2.937)   | <0.001         |                      |                |
| Diabetes mellitus                     | 3.314 (2.242-4.898)   | <0.001         |                      |                |
| Chronic kidney disease                | 17.175 (6.410-46.023) | <0.001         | 4.182 (1.250-13.998) | 0.020          |
| Cerebrovascular disease               | 2.802 (1.903-4.126)   | <0.001         |                      |                |
| Chronic obstructive pulmonary disease | 4.222 (2.143-8.316)   | <0.001         |                      |                |
| Coronary artery disease               | 3.342 (1.910-5.849)   | <0.001         |                      |                |
| Heart failure                         | 9.997 (4.544-21.997)  | <0.001         | 3.487 (1.365-8.911)  | 0.009          |
| Sepsis                                | 12.608 (7.914-20.084) | <0.001         | 5.033 (2.914-8.692)  | <0.001         |
| Admission type                        |                       | <0.001         |                      | <0.001         |
| Elective surgical                     | 1.0 (Referent)        |                | 1.0 (Referent)       |                |
| Emergency surgical                    | 6.121 (3.735-10.030)  | <0.001         | 3.493 (2.023-6.032)  | <0.001         |
| Medical                               | 9.409 (6.791-13.037)  | <0.001         | 3.237 (2.157-4.858)  | <0.001         |
| sCr                                   | 3.135 (2.385-4.120)   | <0.001         | 1.538 (1.149-2.058)  | 0.004          |
| APACHE II score                       | 1.215 (1.182-1.249)   | <0.001         | 1.101 (1.066-1.137)  | <0.001         |

Abbreviations: AKI, acute kidney injury; OR, odds ratio; CI, confidence interval; sCr, serum creatinine; APACHE II score, acute physiology and chronic health evaluation II score.

**Table 4** Multivariate logistic regression analyses of the two biomarkers for AKI detection

| Variables                                    | AKI, % | Unadjusted OR (95% CI) | <i>P</i> value | Adjusted OR <sup>a</sup> (95% CI) | <i>P</i> value |
|----------------------------------------------|--------|------------------------|----------------|-----------------------------------|----------------|
| NT-proBNP (pg/mL, n)                         |        |                        |                |                                   |                |
| <204, 779                                    | 7.2    | 1.0 (Referent)         |                | 1.0 (Referent)                    |                |
| ≥204, 443                                    | 45.1   | 10.626 (7.639-14.781)  | <0.001         | 3.460 (2.307-5.189)               | <0.001         |
| sCysC layered by the cut-off value (mg/L, n) |        |                        |                |                                   |                |
| <1.02, 861                                   | 10.2   | 1.0 (Referent)         |                | 1.0 (Referent)                    |                |
| ≥1.02, 361                                   | 46.5   | 7.646 (5.651-10.345)   | <0.001         | 2.649 (1.842-3.810)               | <0.001         |

Abbreviations: AKI, acute kidney injury; OR, odds ratio; CI, confidence interval, NT-proBNP, N-terminal pro-B-type natriuretic peptide; sCysC, Serum cystatin C.

<sup>a</sup> Adjusted for chronic kidney disease, heart failure, sepsis, admission type, serum creatinine at admission and acute physiology and chronic health evaluation II score.

**Table 5** Discrimination and reclassification of the combination of biomarkers and clinical model for AKI

|                                                                     | AUC-ROC (95%CI)     | <i>P</i> value <sup>a</sup> | Category-Free NRI (95%CI) | <i>P</i> value <sup>a</sup> | IDI (95%CI)         | <i>P</i> value <sup>a</sup> |
|---------------------------------------------------------------------|---------------------|-----------------------------|---------------------------|-----------------------------|---------------------|-----------------------------|
| Clinical model <sup>b</sup>                                         | 0.840 (0.812-0.868) |                             |                           |                             |                     |                             |
| Clinical model + sCysC                                              | 0.847 (0.819-0.874) | 0.163                       | 0.193 (0.052-0.405)       | 0.036                       | 0.017 (0.009-0.026) | <0.001                      |
| Clinical model + NT-proBNP                                          | 0.855 (0.828-0.882) | 0.013                       | 0.462 (0.196-0.747)       | 0.001                       | 0.028 (0.016-0.039) | <0.001                      |
| Clinical model + NT-proBNP + sCysC                                  | 0.859 (0.832-0.885) | 0.006                       | 0.531 (0.238-0.741)       | <0.001                      | 0.038 (0.025-0.051) | <0.001                      |
| Clinical model + NT-proBNP + sCysC vs<br>Clinical model + sCysC     | -                   | 0.015                       | 0.328 (0.139-0.553)       | 0.002                       | 0.021 (0.010-0.031) | <0.001                      |
| Clinical model + NT-proBNP + sCysC vs<br>Clinical model + NT-proBNP | -                   | 0.223                       | 0.167 (0.013-0.285)       | 0.017                       | 0.011 (0.004-0.018) | 0.003                       |

Abbreviations: AUC-ROC, area under the receiver operating characteristic curve; NRI, net reclassification index; IDI, incremental discrimination improvement; AKI, acute kidney injury; CI, confidence interval; sCysC, serum cystatin C; NT-proBNP, N-terminal pro-B-type natriuretic peptide.

a Biomarker + clinical model versus clinical model.

b The clinical model for detecting AKI is composed of chronic kidney disease, heart failure, sepsis, Admission type, serum creatinine at admission and acute physiology and chronic health evaluation II score.

## Discussion

The study's key finding was that the combination of NT-proBNP and sCysC yields greater discriminative ability for AKI detection at ICU admission with or without a clinical model in critically ill adults. The finding indicates that assessing both serum NT-proBNP and sCysC levels on admission may assist with the early diagnosis and risk stratification of AKI in critically ill adults.

One of the most prevalent complications occurring in a variety of clinical settings is AKI, especially for critically ill patients<sup>[4, 6, 35, 36]</sup>. The development of AKI, as the same as its severity, is strongly associated with increased mortality<sup>[3, 35]</sup>. However, early identification is challenging when sCr or urine production changes are used to detect AKI<sup>[37]</sup>, and precise clinical predictors are not widely known. Numerous studies have found and confirmed the accuracy and additional clinical benefits of these renal biomarkers for early AKI diagnosis, such as insulin-like growth factor-binding protein, matrix metalloproteinase-7, tissue inhibitor metalloproteinase-2, angiotensinogen, sCysC, neutrophil gelatinase-associated lipocalin and so on<sup>[5, 9, 12, 38, 39]</sup>. However, some novel biomarkers are not being used in clinical practice, due to insufficient evidence or previously unavailable commercially. Thus, the rational application of clinically available biomarkers is more practical and economical.

NT-proBNP, a widely used marker of hemodynamic stress, is a polypeptide secreted by the ventricles and its role is to facilitate natriuresis<sup>[17, 40]</sup>. In patients with elevated CVP, the raised pressure may be transmitted to the renal veins, resulting in renal congestion and reduced glomerular filtration<sup>[14, 41, 42]</sup>. It makes sense that NT-proBNP is associated with the development of AKI. The clinical application of serum NT-proBNP in cardiac disease has been



1  
2  
3  
4 extensively confirmed and finds its predictive value for AKI development in patients with HF,  
5  
6 coronary angiography, or percutaneous coronary intervention [19, 23, 43, 44]. Several studies have  
7  
8 elucidated the link between NT-proBNP and AKI incidence after cardiac or noncardiac  
9  
10 surgery<sup>[13, 45-47]</sup>. However, its utility for AKI detection has not been fully evaluated in general  
11  
12 ICU, and it is necessary to verify the reliability and universality of NT-proBNP in  
13  
14 heterogeneous populations. The data demonstrated herein not only maintain NT-proBNP as a  
15  
16 risk factor for AKI but also indicate that it can enhance the risk reclassification and  
17  
18 discrimination for AKI in ICU.  
19  
20  
21  
22  
23

24  
25 A single biomarker is insufficient to express the multiple pathophysiological mechanisms of  
26  
27 AKI, especially for critically ill patients, as AKI is a heterogeneous syndrome<sup>[9, 10]</sup>. There is no  
28  
29 consensus on which specific markers should be combined to detect AKI. Numerous studies  
30  
31 have revealed that combining different biomarkers utilized to detect AKI can improve  
32  
33 predictive abilities<sup>[5, 48, 49]</sup>. Naruse et al. showed that combining urinary liver-type fatty-acid  
34  
35 binding protein and serum NT-proBNP can enhance early prediction of AKI in patients in  
36  
37 medical cardiac ICUs<sup>[15]</sup>. Similar to such studies, we identified that the combination of two  
38  
39 markers, serum NT-proBNP and sCysC, improved the diagnostic performance of AKI.  
40  
41  
42  
43  
44

45  
46 CysC is a glomerular filtration biomarker that can be utilized to anticipate the development  
47  
48 of AKI and undesirable outcomes<sup>[8, 9]</sup>. The application and performance of CysC for AKI  
49  
50 prediction have been demonstrated in various clinical settings<sup>[5, 11, 50-52]</sup>. In individuals with ST-  
51  
52 segment elevation myocardial infarction, a combination of B-type natriuretic peptide and CysC  
53  
54 may contribute to risk stratification for AKI<sup>[25]</sup>. In the present cohort, sCysC had a slightly  
55  
56 higher specificity than NT-proBNP in the detection of AKI, but its sensitivity is limited. The  
57  
58  
59  
60

1  
2  
3  
4 ability of sCysC for detecting AKI was fine, but its AUC-ROC was not as great as NT-proBNP.  
5  
6 Moreover, the combination of serum NT-proBNP and sCysC at ICU admission had the highest  
7  
8 AUC-ROC. These data indicate that the simultaneous measurement of serum NT-proBNP and  
9  
10 sCysC at ICU admission could improve the early identification of AKI.  
11  
12

13  
14 Biomarkers for AKI, which indicates the various underlying pathophysiological mechanisms  
15  
16 involved in AKI incidence, might be superior to individual biomarkers alone<sup>[3, 6]</sup>. It is also  
17  
18 important that these biomarkers profit from being easily measurable, readily accessible,  
19  
20 comparatively cheap, and with an elevated level of sensitivity and specificity. In the present  
21  
22 study, for AKI detection NT-proBNP acted as a hemodynamic stress biomarker with high  
23  
24 sensitivity and specificity, and sCysC had high specificity as a functional biomarker. Even after  
25  
26 clinical risk variables adjustment, elevated NT-proBNP is an independent risk factor for AKI.  
27  
28 The NT-proBNP addition to the clinical model significantly enhanced risk reclassification, as  
29  
30 demonstrated by category-free NRI and IDI. Moreover, our results identified that the addition  
31  
32 of NT-proBNP to sCysC markedly improved their detective abilities as biomarkers. Adding  
33  
34 biomarkers to the clinical model further improved the diagnostic accuracy of AKI, as measured  
35  
36 by AUC-ROCs. These data suggest that a single biomarker is insufficient for early diagnosis of  
37  
38 AKI. Therefore, the method of combining different biomarkers may be of greater use.  
39  
40  
41  
42  
43  
44  
45  
46  
47

48 There are some limitations for this study. First, it was a single-center study, with an unproven  
49  
50 external validity. Second, there were only 26 patients with CKD patients and 31 HF patients  
51  
52 enrolled, and hence we were unable to stratify our group relying on eGFR or cardiac function  
53  
54 at baseline. Accordingly, future studies should be administrated in these subgroups. Last, we  
55  
56 did not accomplish routine echocardiography in all patients to associate NT-proBNP levels with  
57  
58  
59  
60

1  
2  
3  
4 ventricular dilatation or other pathways that may promote NT-proBNP release. Despite these  
5  
6 limitations, we believe that our findings have clinical implications and should facilitate further  
7  
8  
9 research to confirm our results.

### 10 **Conclusion**

11  
12 Simultaneous measurement of NT-proBNP and sCysC at ICU admission increases the early  
13  
14 identification of AKI beyond that of biomarker in isolation, and that the combination of the two  
15  
16 biomarkers and clinical risk factors improves the discriminative ability for AKI detection in  
17  
18  
19  
20  
21  
22  
23  
24  
25  
26  
27  
28  
29  
30  
31  
32  
33  
34  
35  
36  
37  
38  
39  
40  
41  
42  
43  
44  
45  
46  
47  
48  
49  
50  
51  
52  
53  
54  
55  
56  
57  
58  
59  
60

## Abbreviations

(-) LR, negative likelihood ratios

(+) LR, positive likelihood ratios

AKI, Acute kidney injury

APACHE II score, Acute Physiology and Chronic Health Evaluation II score

AUC-ROC, area under the receiver operating characteristic curve

BMI, body mass index

CAD, coronary artery disease

CI, confidence interval

CNY, Chinese yuan

CKD, chronic kidney disease

CKD-EPI, Chronic Kidney Disease Epidemiology Collaboration

COPD, chronic obstructive pulmonary disease

DM, diabetes mellitus

eGFR, estimated glomerular filtration rate

ESRD, end-stage renal disease

HF, heart failure

ICU, intensive care unit

IDI, incremental discrimination improvement

KDIGO, Kidney Disease Improving Global Outcomes

NPV, negative predictive values

NRI net reclassification index

1  
2  
3  
4 NT-proBNP, N-terminal pro-B-type natriuretic peptide  
5

6 ORs, odds ratios  
7  
8

9 PPV, positive predictive values  
10

11 RRT, renal replacement therapy  
12

13  
14 sCr, serum creatinine  
15

16  
17 sCysC, serum cystatin C  
18

19 UP, Urine production first 24 h after admission  
20  
21  
22

### 23 24 **Acknowledgements**

25  
26  
27 The authors thank all the doctors, nurses, technicians, and patients at the Guangdong Provincial  
28  
29 People's Hospital for their dedication in the study.  
30  
31  
32

### 33 34 35 **Authors' contributions**

36  
37 JD, LLH, YFL and LHH equally contributed to the design of the research, analysis and  
38  
39 interpretation of the data. CBC and JD contributed to the conception and design of the research  
40  
41 as well as interpretation of the data, and critically revised the manuscript. JD, LLH, YFL, LHH,  
42  
43 JX, HF and YL performed the research and collected data. All authors contributed to the  
44  
45 acquisition and analysis of the data, drafted the manuscript, and agree to be fully accountable  
46  
47 for ensuring the integrity and accuracy of the work. All authors read and approved the final  
48  
49 manuscript.  
50  
51  
52  
53  
54  
55  
56  
57  
58  
59  
60

### **Funding**

1  
2  
3  
4 The study was supported by Chunbo Chen's research grants from the National Natural Science  
5  
6 Foundation of China [82172162], the Major Program of Summit Project, Guangdong Province  
7  
8 High-level Hospital Construction Project of Guangdong Provincial People's Hospital,  
9  
10 Guangdong Academy of Medical Sciences [DFJH2020028] and the Office of Talent Work  
11  
12 Leading Group in Maoming (number of MaoRenCaiBan [2020]24).  
13  
14  
15

### 16 **Availability of data and materials**

17  
18  
19 The datasets generated and/or analyzed during this study are not publicly available, owing to  
20  
21 currently ongoing research studies, but the data are available from the corresponding author on  
22  
23 reasonable request.  
24  
25  
26  
27  
28  
29

### 30 **Ethics approval and consent to participate**

31  
32 The ethics committee of the Guangdong Provincial People's Hospital approved the study design,  
33  
34 protocol, ethical issue, and data and sample collection (No. GDREC2015396H(R1)). Written  
35  
36 informed consent was obtained from each patient or from the appropriate surrogates.  
37  
38  
39

### 40 **Patient consent for publication**

41  
42 Not required.  
43  
44

### 45 **Patient and public involvement**

46  
47 Patients and/or the public were not involved in the design, or conduct, or reporting, or  
48  
49 dissemination plans of this research.  
50  
51  
52

### 53 **Consent for publication**

54  
55 Not applicable. No individual personal data are included in the study. All patients provided  
56  
57 necessary consent to participate in the present study.  
58  
59  
60

## Competing interests

The authors declare that they have no competing interests.

## Uncategorized References

1. Hoste EA, Bagshaw SM, Bellomo R, Cely CM, Colman R, Cruz DN, Edipidis K, Forni LG, Gomersall CD, Govil D *et al*: **Epidemiology of acute kidney injury in critically ill patients: the multinational AKI-EPI study**. *Intensive care medicine* 2015, **41**(8):1411-1423.
2. Srisawat N, Kulvichit W, Mahamitra N, Hurst C, Praditpornsilpa K, Lumlertgul N, Chuasuwan A, Trongtrakul K, Tasnarong A, Champunot R *et al*: **The epidemiology and characteristics of acute kidney injury in the Southeast Asia intensive care unit: a prospective multicentre study**. *Nephrology, dialysis, transplantation : official publication of the European Dialysis and Transplant Association - European Renal Association* 2020, **35**(10):1729-1738.
3. Ronco C, Bellomo R, Kellum JA: **Acute kidney injury**. *Lancet (London, England)* 2019, **394**(10212):1949-1964.
4. Levey AS, James MT: **Acute Kidney Injury**. *Annals of internal medicine* 2017, **167**(9):Itc66-itc80.
5. Deng Y, Chi R, Chen S, Ye H, Yuan J, Wang L, Zhai Y, Gao L, Zhang D, Hu L *et al*: **Evaluation of clinically available renal biomarkers in critically ill adults: a prospective multicenter observational study**. *Critical care (London, England)* 2017, **21**(1):46.
6. Liu KD, Goldstein SL, Vijayan A, Parikh CR, Kashani K, Okusa MD, Agarwal A, Cerdá J: **AKI!Now Initiative: Recommendations for Awareness, Recognition, and Management of AKI**. *Clinical journal of the American Society of Nephrology : CJASN* 2020, **15**(12):1838-1847.
7. **Kidney Disease: Improving Global Outcomes (KDIGO) Acute Kidney Injury Work Group. KDIGO Clinical Practice Guideline for Acute Kidney Injury**. 2012.
8. Teo SH, Endre ZH: **Biomarkers in acute kidney injury (AKI)**. *Best practice & research Clinical anaesthesiology* 2017, **31**(3):331-344.
9. Albert C, Haase M, Albert A, Zapf A, Braun-Dullaeus RC, Haase-Fielitz A: **Biomarker-Guided Risk Assessment for Acute Kidney Injury: Time for Clinical Implementation?** *Annals of laboratory medicine* 2021, **41**(1):1-15.
10. McCullough PA, Shaw AD, Haase M, Bouchard J, Waikar SS, Siew ED, Murray PT, Mehta RL, Ronco C: **Diagnosis of acute kidney injury using functional and injury biomarkers: workgroup statements from the tenth Acute Dialysis Quality Initiative Consensus Conference**. *Contributions to nephrology* 2013, **182**:13-29.
11. Deng Y, Ma J, Hou Y, Zhou D, Hou T, Li J, Liang S, Tan N, Chen C: **Combining Serum Cystatin C and Urinary N-Acetyl-Beta-D-Glucosaminidase Improves the**

- 1  
2  
3  
4  
5  
6  
7  
8  
9  
10  
11  
12  
13  
14  
15  
16  
17  
18  
19  
20  
21  
22  
23  
24  
25  
26  
27  
28  
29  
30  
31  
32  
33  
34  
35  
36  
37  
38  
39  
40  
41  
42  
43  
44  
45  
46  
47  
48  
49  
50  
51  
52  
53  
54  
55  
56  
57  
58  
59  
60
- Precision for Acute Kidney Injury Diagnosis after Resection of Intracranial Space-Occupying Lesions.** *Kidney & blood pressure research* 2020, **45**(1):142-156.
12. Yang X, Chen C, Tian J, Zha Y, Xiong Y, Sun Z, Chen P, Li J, Yang T, Ma C *et al*: **Urinary Angiotensinogen Level Predicts AKI in Acute Decompensated Heart Failure: A Prospective, Two-Stage Study.** *Journal of the American Society of Nephrology : JASN* 2015, **26**(8):2032-2041.
13. Cardinale D, Cosentino N, Moltrasio M, Sandri MT, Petrella F, Colombo A, Bacchiani G, Tessitore A, Bonomi A, Veglia F *et al*: **Acute kidney injury after lung cancer surgery: Incidence and clinical relevance, predictors, and role of N-terminal pro B-type natriuretic peptide.** *Lung cancer (Amsterdam, Netherlands)* 2018, **123**:155-159.
14. Haines R, Crichton S, Wilson J, Treacher D, Ostermann M: **Cardiac biomarkers are associated with maximum stage of acute kidney injury in critically ill patients: a prospective analysis.** *Critical care (London, England)* 2017, **21**(1):88.
15. Naruse H, Ishii J, Takahashi H, Kitagawa F, Nishimura H, Kawai H, Muramatsu T, Harada M, Yamada A, Motoyama S *et al*: **Predicting acute kidney injury using urinary liver-type fatty-acid binding protein and serum N-terminal pro-B-type natriuretic peptide levels in patients treated at medical cardiac intensive care units.** *Critical care (London, England)* 2018, **22**(1):197.
16. Schaub JA, Coca SG, Moledina DG, Gentry M, Testani JM, Parikh CR: **Amino-Terminal Pro-B-Type Natriuretic Peptide for Diagnosis and Prognosis in Patients With Renal Dysfunction: A Systematic Review and Meta-Analysis.** *JACC Heart failure* 2015, **3**(12):977-989.
17. Wiese S, Breyer T, Dragu A, Wakili R, Burkard T, Schmidt-Schweda S, Füchtbauer EM, Dohrmann U, Beyersdorf F, Radicke D *et al*: **Gene expression of brain natriuretic peptide in isolated atrial and ventricular human myocardium: influence of angiotensin II and diastolic fiber length.** *Circulation* 2000, **102**(25):3074-3079.
18. Damman K, Testani JM: **The kidney in heart failure: an update.** *European heart journal* 2015, **36**(23):1437-1444.
19. Goussot S, Mousson C, Guenancia C, Stamboul K, Brunel P, Brunet D, Touzery C, Cottin Y, Zeller M: **N-Terminal Fragment of Pro B-type Natriuretic Peptide as a Marker of Contrast-Induced Nephropathy After Primary Percutaneous Coronary Intervention for ST-Segment Elevation Myocardial Infarction.** *The American journal of cardiology* 2015, **116**(6):865-871.
20. Yamashita T, Seino Y, Ogawa A, Ogata K, Fukushima M, Tanaka K, Mizuno K: **N-terminal pro-BNP is a novel biomarker for integrated cardio-renal burden and early risk stratification in patients admitted for cardiac emergency.** *Journal of cardiology* 2010, **55**(3):377-383.
21. Herget-Rosenthal S, Marggraf G, Hüsing J, Göring F, Pietruck F, Janssen O, Philipp T, Kribben A: **Early detection of acute renal failure by serum cystatin C.** *Kidney international* 2004, **66**(3):1115-1122.
22. Carrasco-Sánchez FJ, Pérez-Calvo JI, Morales-Rull JL, Galisteo-Almeda L, Páez-Rubio I, Barón-Franco B, Aguayo-Canela M, Pujol-De la llave E: **Heart failure mortality**



- 1  
2  
3  
4 according to acute variations in N-terminal pro B-type natriuretic peptide and  
5 cystatin C levels. *Journal of cardiovascular medicine (Hagerstown, Md)* 2014,  
6 **15**(2):115-121.
- 7 23. Linzbach S, Samigullin A, Yilmaz S, Tsioga M, Zeiher AM, Spyridopoulos I: **Role of**  
8 **N-terminal pro-brain natriuretic peptide and cystatin C to estimate renal function**  
9 **in patients with and without heart failure.** *The American journal of cardiology* 2009,  
10 **103**(8):1128-1133.
- 11 24. Ruan ZB, Zhu L, Yin YG, Chen GC: **Cystatin C, N-terminal probrain natriuretic**  
12 **peptides and outcomes in acute heart failure with acute kidney injury in a 12-**  
13 **month follow-up: Insights into the cardiorenal syndrome.** *Journal of research in*  
14 *medical sciences : the official journal of Isfahan University of Medical Sciences* 2014,  
15 **19**(5):404-409.
- 16 25. Tung YC, Chang CH, Chen YC, Chu PH: **Combined biomarker analysis for risk of**  
17 **acute kidney injury in patients with ST-segment elevation myocardial infarction.**  
18 *PloS one* 2015, **10**(4):e0125282.
- 19 26. Wang C, Han S, Tong F, Li Y, Li Z, Sun Z: **Predictive Value of the Serum Cystatin**  
20 **C/Prealbumin Ratio in Combination With NT-proBNP Levels for Long-Term**  
21 **Prognosis in Chronic Heart Failure Patients: A Retrospective Cohort Study.**  
22 *Frontiers in cardiovascular medicine* 2021, **8**:684919.
- 23 27. von Elm E, Altman DG, Egger M, Pocock SJ, Gøtzsche PC, Vandenbroucke JP: **The**  
24 **Strengthening the Reporting of Observational Studies in Epidemiology (STROBE)**  
25 **statement: guidelines for reporting observational studies.** *Annals of internal*  
26 *medicine* 2007, **147**(8):573-577.
- 27 28. Bossuyt PM, Reitsma JB, Bruns DE, Gatsonis CA, Glasziou PP, Irwig LM, Lijmer JG,  
28 Moher D, Rennie D, de Vet HC: **Toward complete and accurate reporting of studies**  
29 **of diagnostic accuracy: the STARD initiative.** *Academic radiology* 2003, **10**(6):664-  
30 669.
- 31 29. Levey AS, Stevens LA, Schmid CH, Zhang YL, Castro AF, 3rd, Feldman HI, Kusek  
32 JW, Eggers P, Van Lente F, Greene T *et al*: **A new equation to estimate glomerular**  
33 **filtration rate.** *Annals of internal medicine* 2009, **150**(9):604-612.
- 34 30. Endre ZH, Walker RJ, Pickering JW, Shaw GM, Frampton CM, Henderson SJ,  
35 Hutchison R, Mehrtens JE, Robinson JM, Schollum JB *et al*: **Early intervention with**  
36 **erythropoietin does not affect the outcome of acute kidney injury (the EARLYARF**  
37 **trial).** *Kidney international* 2010, **77**(11):1020-1030.
- 38 31. DeLong ER, DeLong DM, Clarke-Pearson DL: **Comparing the areas under two or**  
39 **more correlated receiver operating characteristic curves: a nonparametric**  
40 **approach.** *Biometrics* 1988, **44**(3):837-845.
- 41 32. Youden WJ: **Index for rating diagnostic tests.** *Cancer* 1950, **3**(1):32-35.
- 42 33. Cook NR: **Statistical evaluation of prognostic versus diagnostic models: beyond the**  
43 **ROC curve.** *Clinical chemistry* 2008, **54**(1):17-23.
- 44 34. Pencina MJ, D'Agostino RB, Sr., D'Agostino RB, Jr., Vasan RS: **Evaluating the added**  
45 **predictive ability of a new marker: from area under the ROC curve to**  
46 **reclassification and beyond.** *Statistics in medicine* 2008, **27**(2):157-172; discussion  
47 207-112.
- 48  
49  
50  
51  
52  
53  
54  
55  
56  
57  
58  
59  
60

- 1  
2  
3  
4  
5  
6  
7  
8  
9  
10  
11  
12  
13  
14  
15  
16  
17  
18  
19  
20  
21  
22  
23  
24  
25  
26  
27  
28  
29  
30  
31  
32  
33  
34  
35  
36  
37  
38  
39  
40  
41  
42  
43  
44  
45  
46  
47  
48  
49  
50  
51  
52  
53  
54  
55  
56  
57  
58  
59  
60
35. Xu X, Nie S, Liu Z, Chen C, Xu G, Zha Y, Qian J, Liu B, Han S, Xu A *et al*: **Epidemiology and Clinical Correlates of AKI in Chinese Hospitalized Adults.** *Clinical journal of the American Society of Nephrology : CJASN* 2015, **10**(9):1510-1518.
  36. Xu X, Nie S, Zhang A, Mao J, Liu HP, Xia H, Xu H, Liu Z, Feng S, Zhou W *et al*: **Acute Kidney Injury among Hospitalized Children in China.** *Clinical journal of the American Society of Nephrology : CJASN* 2018, **13**(12):1791-1800.
  37. Martins CB, De Bels D, Honore PM, Redant S: **Early Prediction of Acute Kidney Injury by Machine Learning: Should We Add the Urine Output Criterion to Improve this New Tool?** *Journal of translational internal medicine* 2020, **8**(4):201-202.
  38. Chen C, Yang X, Lei Y, Zha Y, Liu H, Ma C, Tian J, Chen P, Yang T, Hou FF: **Urinary Biomarkers at the Time of AKI Diagnosis as Predictors of Progression of AKI among Patients with Acute Cardiorenal Syndrome.** *Clinical journal of the American Society of Nephrology : CJASN* 2016, **11**(9):1536-1544.
  39. Yang X, Chen C, Teng S, Fu X, Zha Y, Liu H, Wang L, Tian J, Zhang X, Liu Y *et al*: **Urinary Matrix Metalloproteinase-7 Predicts Severe AKI and Poor Outcomes after Cardiac Surgery.** *Journal of the American Society of Nephrology : JASN* 2017, **28**(11):3373-3382.
  40. Daniels LB, Maisel AS: **Natriuretic peptides.** *Journal of the American College of Cardiology* 2007, **50**(25):2357-2368.
  41. Gambardella I, Gaudino M, Ronco C, Lau C, Ivascu N, Girardi LN: **Congestive kidney failure in cardiac surgery: the relationship between central venous pressure and acute kidney injury.** *Interactive cardiovascular and thoracic surgery* 2016, **23**(5):800-805.
  42. Redant S, Honoré PM, De Bels D: **Fifty Shades of Central Venous Pressure in the Cardiorenal Syndrome.** *Journal of translational internal medicine* 2020, **8**(1):1-2.
  43. Li X, Liu C, Mao Z, Qi S, Song R, Zhou F: **Brain Natriuretic Peptide for Predicting Contrast-Induced Acute Kidney Injury in Patients with Acute Coronary Syndrome Undergoing Coronary Angiography: A Systematic Review and Meta-Analysis.** *Journal of interventional cardiology* 2020, **2020**:1035089.
  44. Lin KY, Wu ZY, You ZB, Zheng WP, Lin CJ, Jiang H, Ruan JM, Guo YS, Zhu PL: **Pre-Procedural N-Terminal Pro-B Type Natriuretic Peptide Predicts Contrast-Induced Acute Kidney Injury and Long-Term Outcome in Elderly Patients After Elective Percutaneous Coronary Intervention.** *International heart journal* 2018, **59**(5):926-934.
  45. Greenberg JH, Parsons M, Zappitelli M, Jia Y, Thiessen-Philbrook HR, Devarajan P, Everett AD, Parikh CR: **Cardiac Biomarkers for Risk Stratification of Acute Kidney Injury After Pediatric Cardiac Surgery.** *The Annals of thoracic surgery* 2021, **111**(1):191-198.
  46. Patel UD, Garg AX, Krumholz HM, Shlipak MG, Coca SG, Sint K, Thiessen-Philbrook H, Koyner JL, Swaminathan M, Passik CS *et al*: **Preoperative serum brain natriuretic peptide and risk of acute kidney injury after cardiac surgery.** *Circulation* 2012, **125**(11):1347-1355.
  47. Zhao BC, Zhuang PP, Lei SH, Qiu SD, Yang X, Li C, Liu WF, Liu KX: **Pre-operative**

- 1  
2  
3  
4  
5  
6  
7  
8  
9  
10  
11  
12  
13  
14  
15  
16  
17  
18  
19  
20  
21  
22  
23  
24  
25  
26  
27  
28  
29  
30  
31  
32  
33  
34  
35  
36  
37  
38  
39  
40  
41  
42  
43  
44  
45  
46  
47  
48  
49  
50  
51  
52  
53  
54  
55  
56  
57  
58  
59  
60
- N-terminal pro-B-type natriuretic peptide for prediction of acute kidney injury after noncardiac surgery: A retrospective cohort study.** *European journal of anaesthesiology* 2021, **38**(6):591-599.
48. Basu RK, Wong HR, Krawczeski CD, Wheeler DS, Manning PB, Chawla LS, Devarajan P, Goldstein SL: **Combining functional and tubular damage biomarkers improves diagnostic precision for acute kidney injury after cardiac surgery.** *Journal of the American College of Cardiology* 2014, **64**(25):2753-2762.
49. Yang CH, Chang CH, Chen TH, Fan PC, Chang SW, Chen CC, Chu PH, Chen YT, Yang HY, Yang CW *et al*: **Combination of Urinary Biomarkers Improves Early Detection of Acute Kidney Injury in Patients With Heart Failure.** *Circulation journal : official journal of the Japanese Circulation Society* 2016, **80**(4):1017-1023.
50. Deng Y, Wang L, Hou Y, Ma J, Chi R, Ye H, Zhai Y, Zhang D, Gao L, Hu L *et al*: **The influence of glycemic status on the performance of cystatin C for acute kidney injury detection in the critically ill.** *Renal failure* 2019, **41**(1):139-149.
51. Liang S, Shi M, Bai Y, Deng Y, Fang M, Li J, Wu Y, Peng W, Hou Y, Fang H *et al*: **The effect of glucocorticoids on serum cystatin C in identifying acute kidney injury: a propensity-matched cohort study.** *BMC nephrology* 2020, **21**(1):519.
52. Zhang D, Gao L, Ye H, Chi R, Wang L, Hu L, Ouyang X, Hou Y, Deng Y, Long Y *et al*: **Impact of thyroid function on cystatin C in detecting acute kidney injury: a prospective, observational study.** *BMC nephrology* 2019, **20**(1):41.

### Figure legends

**Figure 1.** Flowchart for patient selection. ICU, intensive care unit; AKI, acute kidney injury; ESRD, end-stage renal disease; RRT, renal replacement therapy.

**Figure 2.** ROC analysis of the two biomarkers for AKI detection. Among 1222 patients, 256 were diagnosed as AKI. ROC, receiver operating characteristic; AKI, acute kidney injury; AUC, area under the receiver operating characteristic curve; CI, confidence interval; NT-proBNP, N-terminal pro-B-type natriuretic peptide; sCysC, serum cystatin C.

**Figure 3.** ROC analysis when two biomarkers were added to the clinical model for AKI detection. Among 1222 patients, 256 were diagnosed as AKI. ROC, receiver operating characteristic; AKI, acute kidney injury; AUC, area under the receiver operating characteristic curve; CI, confidence interval; sCysC, serum cystatin C; NT-proBNP, N-terminal pro-B-type natriuretic peptide.

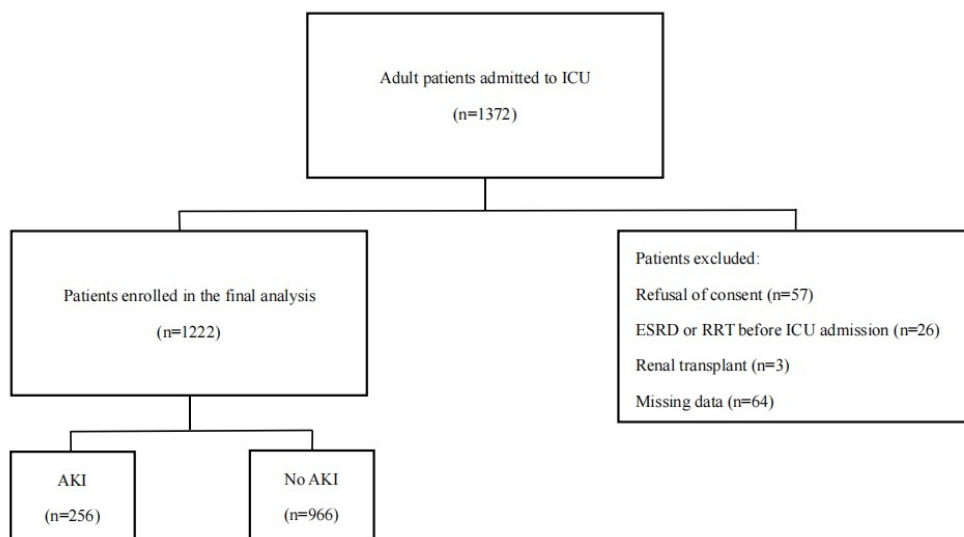

Flowchart for patient selection. ICU, intensive care unit; AKI, acute kidney injury; ESRD, end-stage renal disease; RRT, renal replacement therapy.

170x103mm (144 x 144 DPI)

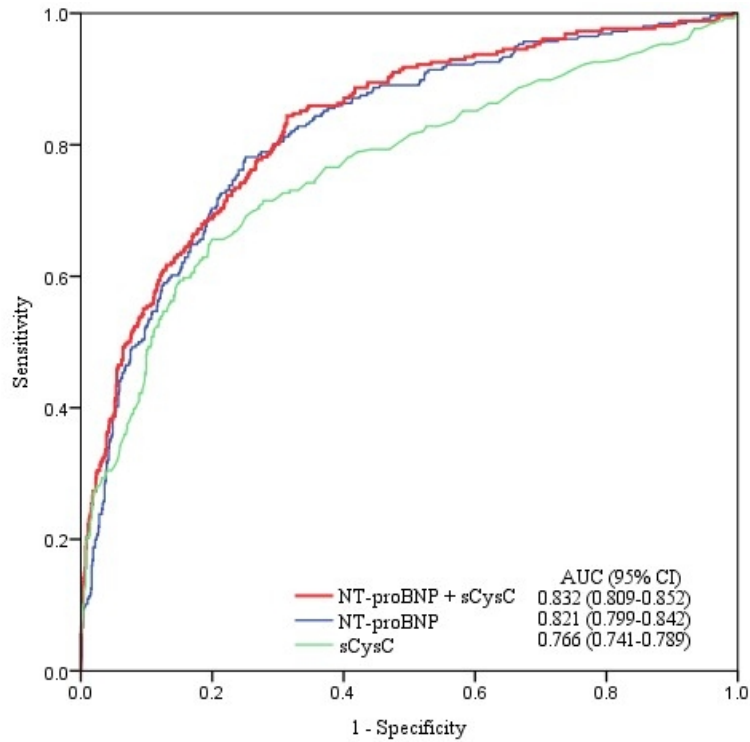

ROC analysis of the two biomarkers for AKI detection. Among 1222 patients, 256 were diagnosed as AKI. ROC, receiver operating characteristic; AKI, acute kidney injury; AUC, area under the receiver operating characteristic curve; CI, confidence interval; NT-proBNP, N-terminal pro-B-type natriuretic peptide; sCysC, serum cystatin C.

165x132mm (96 x 96 DPI)

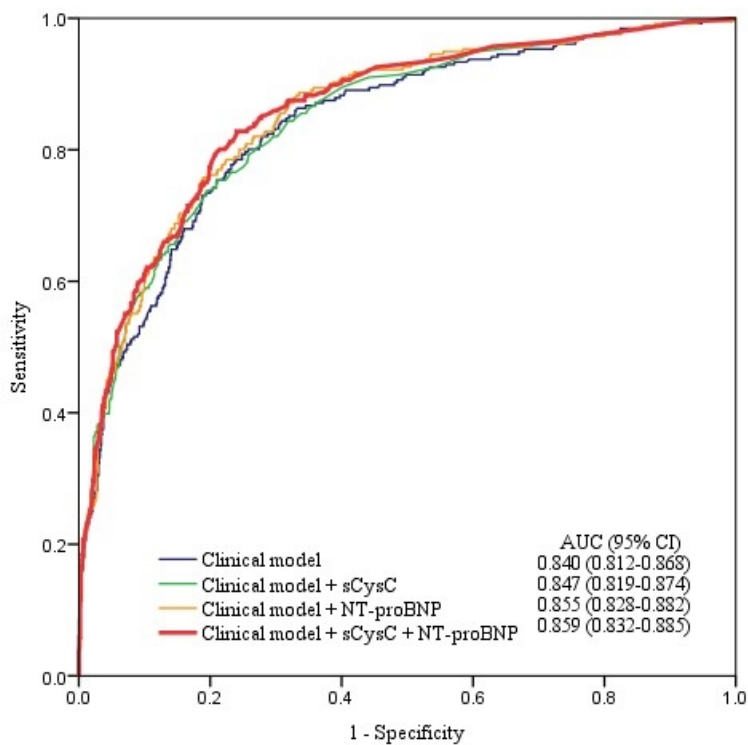

ROC analysis when two biomarkers were added to the clinical model for AKI detection. Among 1222 patients, 256 were diagnosed as AKI. ROC, receiver operating characteristic; AKI, acute kidney injury; AUC, area under the receiver operating characteristic curve; CI, confidence interval; sCysC, serum cystatin C; NT-proBNP, N-terminal pro-B-type natriuretic peptide.

165x132mm (96 x 96 DPI)

STROBE Statement—Checklist of items that should be included in reports of *cohort studies*

|                              | Item No | Recommendation                                                                                                                                                                                    | Page No        |
|------------------------------|---------|---------------------------------------------------------------------------------------------------------------------------------------------------------------------------------------------------|----------------|
| <b>Title and abstract</b>    | 1       | (a) Indicate the study's design with a commonly used term in the title or the abstract                                                                                                            | P1             |
|                              |         | (b) Provide in the abstract an informative and balanced summary of what was done and what was found                                                                                               | P4             |
| <b>Introduction</b>          |         |                                                                                                                                                                                                   |                |
| Background/rationale         | 2       | Explain the scientific background and rationale for the investigation being reported                                                                                                              | P7             |
| Objectives                   | 3       | State specific objectives, including any prespecified hypotheses                                                                                                                                  | P8             |
| <b>Methods</b>               |         |                                                                                                                                                                                                   |                |
| Study design                 | 4       | Present key elements of study design early in the paper                                                                                                                                           | P9             |
| Setting                      | 5       | Describe the setting, locations, and relevant dates, including periods of recruitment, exposure, follow-up, and data collection                                                                   | P9             |
| Participants                 | 6       | (a) Give the eligibility criteria, and the sources and methods of selection of participants. Describe methods of follow-up                                                                        | P9             |
|                              |         | (b) For matched studies, give matching criteria and number of exposed and unexposed                                                                                                               | P9             |
| Variables                    | 7       | Clearly define all outcomes, exposures, predictors, potential confounders, and effect modifiers. Give diagnostic criteria, if applicable                                                          | P9-10          |
| Data sources/<br>measurement | 8*      | For each variable of interest, give sources of data and details of methods of assessment (measurement). Describe comparability of assessment methods if there is more than one group              | P10-11         |
| Bias                         | 9       | Describe any efforts to address potential sources of bias                                                                                                                                         | P11            |
| Study size                   | 10      | Explain how the study size was arrived at                                                                                                                                                         | P9             |
| Quantitative variables       | 11      | Explain how quantitative variables were handled in the analyses. If applicable, describe which groupings were chosen and why                                                                      | P11            |
| Statistical methods          | 12      | (a) Describe all statistical methods, including those used to control for confounding                                                                                                             | P11            |
|                              |         | (b) Describe any methods used to examine subgroups and interactions                                                                                                                               | P11            |
|                              |         | (c) Explain how missing data were addressed                                                                                                                                                       | P9             |
|                              |         | (d) If applicable, explain how loss to follow-up was addressed                                                                                                                                    | P11            |
|                              |         | (e) Describe any sensitivity analyses                                                                                                                                                             | P11            |
| <b>Results</b>               |         |                                                                                                                                                                                                   |                |
| Participants                 | 13*     | (a) Report numbers of individuals at each stage of study—eg numbers potentially eligible, examined for eligibility, confirmed eligible, included in the study, completing follow-up, and analysed | P13            |
|                              |         | (b) Give reasons for non-participation at each stage                                                                                                                                              | P13            |
|                              |         | (c) Consider use of a flow diagram                                                                                                                                                                | P13            |
| Descriptive data             | 14*     | (a) Give characteristics of study participants (eg demographic, clinical, social) and information on exposures and potential confounders                                                          | P13            |
|                              |         | (b) Indicate number of participants with missing data for each variable of interest                                                                                                               | Not Applicable |
|                              |         | (c) Summarise follow-up time (eg, average and total amount)                                                                                                                                       | Not Applicable |
| Outcome data                 | 15*     | Report numbers of outcome events or summary measures over time                                                                                                                                    | P13-15         |



|    |                          |    |                                                                                                                                                                                                              |        |
|----|--------------------------|----|--------------------------------------------------------------------------------------------------------------------------------------------------------------------------------------------------------------|--------|
| 1  | Main results             | 16 | (a) Give unadjusted estimates and, if applicable, confounder-adjusted estimates and their precision (eg, 95% confidence interval). Make clear which confounders were adjusted for and why they were included | P13-15 |
| 2  |                          |    | (b) Report category boundaries when continuous variables were categorized                                                                                                                                    | P14    |
| 3  |                          |    | (c) If relevant, consider translating estimates of relative risk into absolute risk for a meaningful time period                                                                                             |        |
| 4  |                          |    |                                                                                                                                                                                                              |        |
| 5  |                          |    |                                                                                                                                                                                                              |        |
| 6  |                          |    |                                                                                                                                                                                                              |        |
| 7  |                          |    |                                                                                                                                                                                                              |        |
| 8  |                          |    |                                                                                                                                                                                                              |        |
| 9  | Other analyses           | 17 | Report other analyses done—eg analyses of subgroups and interactions, and sensitivity analyses                                                                                                               | P15    |
| 10 |                          |    |                                                                                                                                                                                                              |        |
| 11 | <b>Discussion</b>        |    |                                                                                                                                                                                                              |        |
| 12 |                          |    |                                                                                                                                                                                                              |        |
| 13 | Key results              | 18 | Summarise key results with reference to study objectives                                                                                                                                                     | P21    |
| 14 | Limitations              | 19 | Discuss limitations of the study, taking into account sources of potential bias or imprecision. Discuss both direction and magnitude of any potential bias                                                   | P23    |
| 15 |                          |    |                                                                                                                                                                                                              |        |
| 16 |                          |    |                                                                                                                                                                                                              |        |
| 17 | Interpretation           | 20 | Give a cautious overall interpretation of results considering objectives, limitations, multiplicity of analyses, results from similar studies, and other relevant evidence                                   | P21-24 |
| 18 |                          |    |                                                                                                                                                                                                              |        |
| 19 | Generalisability         | 21 | Discuss the generalisability (external validity) of the study results                                                                                                                                        | P22-23 |
| 20 |                          |    |                                                                                                                                                                                                              |        |
| 21 | <b>Other information</b> |    |                                                                                                                                                                                                              |        |
| 22 |                          |    |                                                                                                                                                                                                              |        |
| 23 | Funding                  | 22 | Give the source of funding and the role of the funders for the present study and, if applicable, for the original study on which the present article is based                                                | P27    |
| 24 |                          |    |                                                                                                                                                                                                              |        |

\*Give information separately for exposed and unexposed groups.

**Note:** An Explanation and Elaboration article discusses each checklist item and gives methodological background and published examples of transparent reporting. The STROBE checklist is best used in conjunction with this article (freely available on the Web sites of PLoS Medicine at <http://www.plosmedicine.org/>, Annals of Internal Medicine at <http://www.annals.org/>, and Epidemiology at <http://www.epidem.com/>). Information on the STROBE Initiative is available at <http://www.strobe-statement.org>.



# BMJ Open

## Serum N-terminal pro-B-type natriuretic peptide and cystatin C for acute kidney injury detection in critically ill adults: A prospective, observational study

|                                 |                                                                                                                                                                                                                                                                                                                                                                                                                                                                                                                                                                                                                                                                                                                                                                                                                                                                                                                                                                                                                                                                                                                                                                                                                                                                                                                                                                                      |
|---------------------------------|--------------------------------------------------------------------------------------------------------------------------------------------------------------------------------------------------------------------------------------------------------------------------------------------------------------------------------------------------------------------------------------------------------------------------------------------------------------------------------------------------------------------------------------------------------------------------------------------------------------------------------------------------------------------------------------------------------------------------------------------------------------------------------------------------------------------------------------------------------------------------------------------------------------------------------------------------------------------------------------------------------------------------------------------------------------------------------------------------------------------------------------------------------------------------------------------------------------------------------------------------------------------------------------------------------------------------------------------------------------------------------------|
| Journal:                        | <i>BMJ Open</i>                                                                                                                                                                                                                                                                                                                                                                                                                                                                                                                                                                                                                                                                                                                                                                                                                                                                                                                                                                                                                                                                                                                                                                                                                                                                                                                                                                      |
| Manuscript ID                   | bmjopen-2022-063896.R1                                                                                                                                                                                                                                                                                                                                                                                                                                                                                                                                                                                                                                                                                                                                                                                                                                                                                                                                                                                                                                                                                                                                                                                                                                                                                                                                                               |
| Article Type:                   | Original research                                                                                                                                                                                                                                                                                                                                                                                                                                                                                                                                                                                                                                                                                                                                                                                                                                                                                                                                                                                                                                                                                                                                                                                                                                                                                                                                                                    |
| Date Submitted by the Author:   | 16-Nov-2022                                                                                                                                                                                                                                                                                                                                                                                                                                                                                                                                                                                                                                                                                                                                                                                                                                                                                                                                                                                                                                                                                                                                                                                                                                                                                                                                                                          |
| Complete List of Authors:       | Deng, Jia; Southern Medical University, The Second School of Clinical Medicine; The Second Hospital of Dalian Medical University, Critical Care Medicine<br>He, Linling; Guangdong Academy of Medical Sciences, Department of Intensive Care Unit of Cardiovascular Surgery; Guangdong Academy of Medical Sciences, Department of Critical Care Medicine<br>Liang, Yufan; Maoming People's Hospital, Department of Emergency; Guangdong Medical University<br>Hu, Linhui; Maoming People's Hospital, Department of Critical Care Medicine<br>Xu, Jing; Guangdong Academy of Medical Sciences, Department of Intensive Care Unit of Cardiovascular Surgery; Guangdong Academy of Medical Sciences, Department of Critical Care Medicine<br>Fang, Heng; Guangdong Academy of Medical Sciences, Department of Critical Care Medicine; Guangdong Academy of Medical Sciences, Department of Intensive Care Unit of Cardiovascular Surgery<br>Li, Ying; Guangdong Academy of Medical Sciences, Department of Critical Care Medicine; Guangdong Academy of Medical Sciences, Department of Intensive Care Unit of Cardiovascular Surgery<br>Chen, Chunbo; Southern Medical University, The Second School of Clinical Medicine; Guangdong Cardiovascular Institute, Guangdong General Hospital, Guangdong Academy of Medical Sciences, Department of Intensive Care Unit of Cardiac Surgery |
| <b>Primary Subject Heading</b>: | Intensive care                                                                                                                                                                                                                                                                                                                                                                                                                                                                                                                                                                                                                                                                                                                                                                                                                                                                                                                                                                                                                                                                                                                                                                                                                                                                                                                                                                       |
| Secondary Subject Heading:      | Renal medicine                                                                                                                                                                                                                                                                                                                                                                                                                                                                                                                                                                                                                                                                                                                                                                                                                                                                                                                                                                                                                                                                                                                                                                                                                                                                                                                                                                       |
| Keywords:                       | Acute renal failure < NEPHROLOGY, Adult intensive & critical care < INTENSIVE & CRITICAL CARE, Nephrology < INTERNAL MEDICINE                                                                                                                                                                                                                                                                                                                                                                                                                                                                                                                                                                                                                                                                                                                                                                                                                                                                                                                                                                                                                                                                                                                                                                                                                                                        |
|                                 |                                                                                                                                                                                                                                                                                                                                                                                                                                                                                                                                                                                                                                                                                                                                                                                                                                                                                                                                                                                                                                                                                                                                                                                                                                                                                                                                                                                      |

SCHOLARONE™  
Manuscripts



I, the Submitting Author has the right to grant and does grant on behalf of all authors of the Work (as defined in the below author licence), an exclusive licence and/or a non-exclusive licence for contributions from authors who are: i) UK Crown employees; ii) where BMJ has agreed a CC-BY licence shall apply, and/or iii) in accordance with the terms applicable for US Federal Government officers or employees acting as part of their official duties; on a worldwide, perpetual, irrevocable, royalty-free basis to BMJ Publishing Group Ltd ("BMJ") its licensees and where the relevant Journal is co-owned by BMJ to the co-owners of the Journal, to publish the Work in this journal and any other BMJ products and to exploit all rights, as set out in our [licence](#).

The Submitting Author accepts and understands that any supply made under these terms is made by BMJ to the Submitting Author unless you are acting as an employee on behalf of your employer or a postgraduate student of an affiliated institution which is paying any applicable article publishing charge ("APC") for Open Access articles. Where the Submitting Author wishes to make the Work available on an Open Access basis (and intends to pay the relevant APC), the terms of reuse of such Open Access shall be governed by a Creative Commons licence – details of these licences and which [Creative Commons](#) licence will apply to this Work are set out in our licence referred to above.

Other than as permitted in any relevant BMJ Author's Self Archiving Policies, I confirm this Work has not been accepted for publication elsewhere, is not being considered for publication elsewhere and does not duplicate material already published. I confirm all authors consent to publication of this Work and authorise the granting of this licence.

**Title****Serum N-terminal pro-B-type natriuretic peptide and cystatin C for acute kidney injury detection in critically ill adults: A prospective, observational study**

Jia Deng<sup>1,2,3†</sup>, Linling He<sup>2,4,5†</sup>, Yufan Liang<sup>6,7†</sup>, Linhui Hu<sup>8†</sup>, Jing Xu<sup>2,4</sup>, Heng Fang<sup>2,4</sup>, Ying Li<sup>2,4</sup>, Chunbo Chen<sup>1,2,4,9\*</sup>

1. The Second School of Clinical Medicine, Southern Medical University, Guangzhou 510515, Guangdong, China

2. Department of Critical Care Medicine, Guangdong Provincial People's Hospital, Guangdong Academy of Medical Sciences, 106 Zhongshan Er Road, Guangzhou 510080, Guangdong, China.

3. Department of Critical Care Medicine, The Second Hospital of Dalian Medical University, Dalian 116023, Liaoning, China

4. Department of Intensive Care Unit of Cardiovascular Surgery, Guangdong Cardiovascular Institute, Guangdong Provincial People's Hospital, Guangdong Academy of Medical Sciences, Laboratory of South China Structural Heart Disease, 96 Dongchuan Road, Guangzhou 510080, Guangdong, China.

5. Shantou University Medical College, Shantou 515063, Guangdong, China.

6. Department of Emergency, Maoming People's Hospital, 101 Weimin Road, Maoming 525000, Guangdong, China.

7. Guangdong Medical University, Zhanjiang 524023, Guangdong, China

8. Department of Critical Care Medicine, Maoming People's Hospital, 101 Weimin Road, Maoming 525000, Guangdong, China.

9. National Clinical Research Center for Kidney Disease, State Key Laboratory of Organ Failure Research, Nanfang Hospital, Southern Medical University, Guangzhou 510515, Guangdong, China.

1  
2  
3  
4  
5  
6 \* Corresponding author:  
7

8  
9 Chunbo Chen

10  
11 Department of Intensive Care Unit of Cardiovascular Surgery, Guangdong  
12  
13 Cardiovascular Institute, Guangdong Provincial People's Hospital, Guangdong  
14  
15 Academy of Medical Sciences, 96 Dongchuan Road, Guangzhou 510080, Guangdong  
16  
17 Province, People's Republic of China.  
18  
19

20  
21  
22 Email: [gghccm@163.com](mailto:gghccm@163.com)  
23  
24  
25

26  
27 † Jia Deng, Linling He, Yufan Liang and Linhui Hu these authors contributed equally  
28  
29 to this study, Co-first author.  
30  
31

32  
33 1 The Second School of Clinical Medicine, Southern Medical University, Guangzhou  
34  
35 510515, Guangdong, China  
36  
37  
38  
39

40 Email addresses for all authors:

41  
42  
43 Jia Deng: [dengjia19881001@126.com](mailto:dengjia19881001@126.com)  
44

45  
46 Linling He: [906928457@qq.com](mailto:906928457@qq.com)  
47

48  
49 Yufan Liang: [yufan1524@163.com](mailto:yufan1524@163.com)  
50

51  
52 Linhui Hu: [hulinhui@live.cn](mailto:hulinhui@live.cn)

53  
54 Jing Xu: [xjxiaodaifu@163.com](mailto:xjxiaodaifu@163.com)  
55

56  
57 Heng Fang: [1330928862@qq.com](mailto:1330928862@qq.com)

58  
59 Ying Li: [572257002@qq.com](mailto:572257002@qq.com)  
60

Chunbo Chen: gghccm@163.com

For peer review only

1  
2  
3  
4  
5  
6  
7  
8  
9  
10  
11  
12  
13  
14  
15  
16  
17  
18  
19  
20  
21  
22  
23  
24  
25  
26  
27  
28  
29  
30  
31  
32  
33  
34  
35  
36  
37  
38  
39  
40  
41  
42  
43  
44  
45  
46  
47  
48  
49  
50  
51  
52  
53  
54  
55  
56  
57  
58  
59  
60

## Abstract

**Objective** Serum N-terminal pro-B-type natriuretic peptide (NT-proBNP) and cystatin C (sCysC) are available clinically and beneficial in diagnosing AKI. Our purpose is to identify the performance of their combined diagnosis for AKI in critically ill patients.

**Design** A prospectively-recruited, observational study was performed.

**Setting** Adults admitted to the intensive care unit of a tertiary hospital in China.

**Participants** A total of 1222 critically ill patients were enrolled in the study.

**Main outcome measures** To identify the performance of the combined diagnosis of serum NT-proBNP and sCysC for AKI in critically ill patients. The area under the receiver operating characteristic curve (AUC-ROC), category-free net reclassification index (NRI), and incremental discrimination improvement (IDI) were utilized for comparing the discriminative powers of a combined and single biomarker adjusted model of clinical variables enriched with NTproBNP and Cystatin C for AKI.

## Results

AKI was detected in 256 out of 1222 included patients (20.9%). AUC-ROC for NT-proBNP and sCysC to detect AKI had a significantly higher accuracy than any individual biomarker ( $P < 0.05$ ). After multivariate adjustment, a level of serum NT-proBNP  $\geq 204$  pg/mL was associated with 3.5-fold higher odds for AKI compared with those below the cutoff value. Similar results were obtained for sCysC levels ( $P < 0.001$ ). To detect AKI, adding NT-proBNP and sCysC to a clinical model further increased the AUC-ROC to 0.859 beyond that of the clinical model with or without sCysC ( $P < 0.05$ ). Moreover, the addition of these two to the clinical model significantly improved risk

1  
2  
3  
4 reclassification of AKI beyond that of the clinical model alone or with single biomarker  
5  
6 ( $P < 0.05$ ), as measured by NRI and IDI.  
7  
8

### 9 **Conclusions**

10  
11 In critically ill individuals, serum NT-proBNP, sCysC, and clinical risk factors  
12  
13 combination improve the discriminative power for diagnosing AKI.  
14  
15  
16

### 17 **Keywords**

18  
19 Acute kidney injury, N-terminal pro-B-type natriuretic peptide, Serum cystatin C,  
20  
21  
22 Intensive care unit  
23  
24  
25  
26  
27  
28  
29  
30  
31  
32  
33  
34  
35  
36  
37  
38  
39  
40  
41  
42  
43  
44  
45  
46  
47  
48  
49  
50  
51  
52  
53  
54  
55  
56  
57  
58  
59  
60

### Strengths and limitations of this study

This is the first study to identify the performance of serum NT-proBNP and sCysC combined diagnosis in detecting AKI.

This prospectively-recruited, observational study was of a long duration and had an adequate sample size.

We evaluated the ability of NT-proBNP and sCysC to diagnose AKI primarily by calculating area under the curve and category-free net reclassification index, and incremental discrimination improvement.

A limitation of this study was that the relationship between NT-proBNP and sCysC could not be dynamically assessed because we only measured their levels at the time of admission.

□



## Introduction

Acute kidney injury (AKI) is a predominant clinical syndrome affecting more than 50% of patients who underwent treatment at intensive care unit (ICU)<sup>[1-3]</sup>. Increased morbidity, mortality, hospitalization length, and cost are extremely related to AKI<sup>[4-6]</sup>, so early recognition of AKI is critical to guiding management. Urine production and serum creatinine were employed as diagnostic criteria for AKI in accordance with the recommendations of Kidney Disease Improving Global Outcomes (KDIGO) guidelines<sup>[7]</sup>. Changes in sCr or urine production cannot recognize early renal tubular injury prior to a reduction in glomerular filtration rate<sup>[8,9]</sup>. Therefore, early and reliable AKI biomarkers are necessary to promote timely intervention and minimize complications. However, it is impossible for an individual biomarker to adequately evaluate the risk of AKI as a complex multifactorial syndrome<sup>[3,10]</sup>. Combining diverse biomarkers in a clinical model evaluation could enhance early detection of AKI in critically ill patients<sup>[5,11,12]</sup>.

A hemodynamic marker stress, N-terminal pro-B-type natriuretic peptide (NT-proBNP), has recently received attention as a potential predictor of AKI in a wide diversity of clinical settings<sup>[13-17]</sup>. High serum NT-proBNP level reflects hemodynamic instability, myocardial wall stress, myocardial ischemia, volume overload, sympathetic nervous system and renin-angiotensin-aldosterone system activation, all of which may contribute to AKI incidence<sup>[18-20]</sup>. However, there are finite data on clinical use of NT-proBNP for detecting AKI among critically ill patients.

Serum Cystatin C (sCysC), a 122-amino acid low-molecular-weight protein (13 kDa),

1  
2  
3  
4 is a marker of glomerular filtration<sup>[9]</sup>. CysC has a half-life of about one-third that of  
5  
6 sCr, causing CysC to reach homeostasis three times faster. These properties promote  
7  
8 sCysC as an alternative marker of renal function<sup>[8]</sup>. To date, sCysC has been displayed  
9  
10 to be conducive for the early identification of all-cause AKI<sup>[21]</sup>.  
11  
12

13  
14 Although serum NT-proBNP and sCysC are mainly used for the prognosis  
15  
16 assessment of heart disease and the prediction of acute cardiac events with AKI <sup>[22-26]</sup>,  
17  
18 the diagnostic accuracy of their combination for AKI in ICU remains unknown. We  
19  
20 performed a prospective study in the present research to evaluate the performance of  
21  
22 serum NT-proBNP and sCysC at ICU admission, both independently and in  
23  
24 combination, for AKI determination among critically ill adults.  
25  
26  
27  
28  
29  
30  
31  
32  
33  
34  
35  
36  
37  
38  
39  
40  
41  
42  
43  
44  
45  
46  
47  
48  
49  
50  
51  
52  
53  
54  
55  
56  
57  
58  
59  
60

## Methods

### Study design and participants

At Guangdong Provincial People's Hospital in China, a tertiary care hospital, a prospectively recruited observational research was performed in a mixed medical-surgical ICU. From December 2016 to December 2017, we consecutively enrolled patients aged 18 and up in a row. Pregnancy, renal replacement therapy (RRT) prior to ICU admittance, nephrectomy, end-stage renal disease (ESRD), renal transplant, rejection of consent, or missing admission information were all exclusion criteria. The study protocol strengthened the reporting requirements of observational studies in epidemiology<sup>[27]</sup> and standards for the reporting of diagnostic accuracy<sup>[28]</sup>. This study protocol was authorized by ethics committee of Guangdong Provincial People's Hospital. Additionally, all procedures were carried out consistent with applicable regulations and guidelines. All patients provided written informed consent.

### Data collection

Clinical baseline data were collected prospectively. Within 1 h following ICU admission, blood samples were collected contemporaneously to determine sCr, serum NT-proBNP, and sCysC. Within 24 h after collection, all samples were analyzed in the Guangdong Provincial People's Hospital central laboratory utilizing standard protocol. When a patient is admitted to the ICU, sCr was measured and subsequently done at least once a day until discharge as part of routine clinical care. Throughout admission to ICU, urine production was also been recorded. We evaluated the following clinical variables: age, gender, body mass index (BMI), preexisting clinical conditions, sepsis,

1  
2  
3  
4 admission type, baseline sCr, baseline estimated glomerular filtration rate (eGFR),  
5  
6 Acute Physiology and Chronic Health Evaluation (APACHE) II score, ICU mortality,  
7  
8 in-hospital mortality, duration of ICU admittance, length of hospitalization, ICU costs,  
9  
10 and total costs. The outcome was the incidence of AKI following ICU enrollment  
11  
12 within 1 week. To calculate eGFR, we employed the Chronic Kidney Disease  
13  
14 Epidemiology Collaboration (CKD-EPI) creatinine equation [29].  
15  
16  
17  
18

### 19 **Definitions**

20  
21  
22 The KDIGO classification criteria were utilized to define AKI: as a rise in sCr  
23  
24 by  $\geq 0.3$  mg/dL (26.5  $\mu\text{mol/L}$ ) within 48 h or a rise in sCr to  $\geq 1.5$  times the  
25  
26 baseline within 1 week, or urine output  $< 0.5$  mL/kg/h for 6 h after ICU  
27  
28 admission<sup>[7]</sup>.  
29  
30  
31

32  
33 Relying on following principles, ranked in descending order of preference, a  
34  
35 baseline sCr was affirmed<sup>[30]</sup>: (1) prior to ICU admittance, the most recent pre-  
36  
37 ICU value between 30 and 365 days; (2) a stable pre-ICU value  $> 365$  days prior  
38  
39 to ICU admittance for patients  $< 40$  years of age (stable definition is being within  
40  
41 15% of the lowest ICU measurement); (3) pre-ICU value  $> 365$  days prior to  
42  
43 ICU admittance and lower than the initial sCr at ICU admission; (4) a pre-ICU  
44  
45 value (within 3 and 39 days prior to ICU admittance) lower than or equal to the  
46  
47 initial sCr upon ICU admittance not obviously during AKI; (5) the least sCr  
48  
49 value obtained at initial ICU admittance, the most recent ICU value, or the  
50  
51 lowest value achieved to a 365-day follow up.  
52  
53  
54  
55  
56  
57

### 58 **Biomarker measurement**

1  
2  
3  
4 The levels of sCysC and sCr were quantified through the UniCel DxC 800 Synchron  
5  
6 system usage in compliance with the manufacturer's instructions (Beckman Coulter,  
7  
8 Brea, CA, USA). For sCysC, the intra- and inter-assay variation coefficients were 10%  
9  
10 and 5%, respectively. Levels of serum NT-proBNP were quantified through an  
11  
12 electrochemiluminescence immunoassay employing a Cobas® e602 system usage  
13  
14 (Roche Diagnostics, Germany). For NT-proBNP, the uppermost limit of normal for  
15  
16 those who seem to be healthy (95th percentage) has been 125 pg/mL. The coefficient  
17  
18 of interassay variation for NT-proBNP was < 5%. Each patient's clinical features were  
19  
20 blinded to the personnel measuring the biomarkers.  
21  
22  
23  
24  
25

### 26 27 **Patient and public involvement**

28  
29 Patients and/or the public were not involved in the design, or conduct, or reporting, or  
30  
31 dissemination plans of this research.  
32  
33  
34

### 35 36 **Statistical analysis**

37  
38 For statistical analyses, we utilized SPSS version 21.0 (SPSS, Chicago, IL, USA),  
39  
40 MedCalc version 18.2.1 (MedCalc Software, Ostend, Belgium) and R version 4.1.1 (R  
41  
42 Foundation for Statistical Computing, Vienna, Austria). The mean  $\pm$  standard deviation  
43  
44 or median (25th to 75th percentage, interquartile range) had been utilized to express  
45  
46 continuous variables. Numbers (percent) were utilized to represent categorical variables.  
47  
48 For nonnormally distributed continuous variables, the Wilcoxon rank-sum test was  
49  
50 employed for intergroup difference measurement, and for categorical variables, the chi-  
51  
52 square or Fisher's exact test was deployed.  
53  
54  
55  
56

57  
58 NT-proBNP concentrations were extremely skewed and therefore were log<sub>10</sub>  
59  
60

1  
2  
3  
4 transformed before inclusion in the models. Areas under the receiver operating  
5  
6 characteristic curves (AUC-ROCs) were computed. The method exploited by DeLong  
7  
8 et al. was used to compare AUC-ROCs between groups<sup>[31]</sup>. The biomarkers' sensitivity,  
9  
10 specificity, positive and negative predictive values, positive and negative likelihood  
11  
12 ratios of the biomarkers were calculated. Youden's index for AKI detection identified  
13  
14 the optimal cutoff values for individual biomarkers and their combination<sup>[32]</sup>.  
15  
16  
17  
18

19  
20 Logistic analysis was utilized to compute the odds ratios (ORs) and 95% confidence  
21  
22 intervals for each factor: to identify the independent risk factors of AKI, with a forward  
23  
24 stepwise method, in which the clinical variables with  $P < 0.10$  in univariate analysis  
25  
26 were incorporated into the multivariate logistic model. We categorized NT-proBNP and  
27  
28 sCysC levels according to their cutoff values and then performed logistic regression on  
29  
30 the created variables. We conducted multiple logistic regression analyses to calculate  
31  
32 the adjusted ORs of AKI, which was based on the clinical risk factors for AKI.  
33  
34  
35  
36

37  
38 The performance of AKI detection after adding NT-proBNP and sCysC, or any of  
39  
40 them, into the clinical model as categorical variables was assessed by AUC-ROC,  
41  
42 category-free net reclassification improvement (NRI) index and integrated  
43  
44 discrimination improvement (IDI) index, as described previously<sup>[33, 34]</sup>. To better  
45  
46 quantify how accurately the reference and reclassification model would perform with  
47  
48 independent data, we adopted a 10-fold cross-validation<sup>[35]</sup>. All the tests were 2-tailed,  
49  
50 and  $P < 0.05$  was regarded statistically significant.  
51  
52  
53  
54  
55  
56  
57  
58  
59  
60

## Results

### Clinical data and outcomes

A total of 150 (10.9 %) of the 1372 adult patients enrolled in the study were excluded (Figure 1). Therefore, 1222 patients were enrolled and AKI occurred in 256 patients (20.9%). Patient baseline variables and outcomes are exhibited in Table 1. In comparison to patients without AKI, patients with AKI were elderly and were observed more frequently in those with comorbidities, including chronic kidney disease (CKD), hypertension, coronary artery disease (CAD), diabetes mellitus (DM), heart failure (HF), cerebrovascular disease and chronic obstructive pulmonary disease (COPD). Increased sCr, serum NT-proBNP and sCysC levels at admission, as well as increased APACHE II scores, were more prevalent in AKI patients. The baseline sCr and eGFR did not show significant differences between the two groups.

Indeed, AKI patients had a higher risk of adverse outcomes, a higher percentage of ICU and in-hospital mortality, higher expenses, a longer hospitalization duration, and a longer stay in ICU ( $P < 0.001$ ) compared to those without AKI.

### Detective abilities of the two biomarkers for AKI

To demonstrate the ability of these biomarkers for AKI detection, we used AUC-ROCs to calculate the two biomarkers, respectively, and in combination. AUC-ROCs for NT-proBNP and sCysC were computed for AKI detection (0.821 and 0.766, respectively). For AKI detection, NT-proBNP had a sensitivity of 78% and a specificity of 75%, while sCysC had high specificity but limited sensitivity. The cutoff values for NT-proBNP and sCysC were 204 pg/mL and 1.02 mg/L, respectively, yielding good sensitivity and specificity. We included NT-proBNP and sCysC in a multivariate logistic regression model to derived their combined AUC for comparison with the single biomarker's. The AUC-ROCs for AKI presented a better

1  
2  
3  
4 performance by NT-proBNP and sCysC (0.832) than any individual biomarker ( $P < 0.05$ , Table  
5  
6 2 and Figure 2).

### 9 **Multivariate logistic regression analyses of the two biomarkers for AKI detection**

10  
11 We stratified patients based on the two cutoff values of serum NT-proBNP and sCysC levels  
12  
13 into two categories, respectively. Compared to those with serum NT-proBNP  $< 204$  pg/mL,  
14  
15 patients with serum NT-proBNP  $\geq 204$  pg/mL on admission exhibited a higher incidence of  
16  
17 AKI (7.2% versus 45.1%,  $P < 0.001$ ). AKI was found to have higher incidence (46.5%) in  
18  
19 patients with sCysC  $\geq 1.02$  mg/L compared to those with sCysC  $< 1.02$  mg/L (10.2%) ( $P <$   
20  
21 0.001). Following clinical variables adjustment (including CKD, HF, sepsis, admission type,  
22  
23 sCr at admission, and APACHE II scores, Table 3), a level of serum NT-proBNP  $\geq 204$  pg/mL  
24  
25 was associated with 3.5-fold higher odds for AKI compared with NT-proBNP level below the  
26  
27 cutoff value ( $P < 0.001$ ). Similarly, patients with sCysC  $\geq 1.02$  mg/L were linked to 2.6-fold  
28  
29 greater odds for AKI compared to those with sCysC  $< 1.02$  mg/L ( $P < 0.001$ ) (Table 4).

### 37 **Discrimination and reclassification of the combination of biomarkers and clinical models** 38 39 **for AKI**

40  
41  
42 Considering the effect of adding NT-proBNP and sCysC, or any of them, to a clinical model as  
43  
44 categorical variables for AKI detection, logistic regression analysis was employed. On ICU  
45  
46 admittance for AKI diagnosis, potential available variables including age, sepsis, admission  
47  
48 type, sCr, and APACHE II scores as well as comorbidities, including hypertension, DM, CKD,  
49  
50 cerebrovascular disease, COPD, CAD, and HF were considered. The clinical model for  
51  
52 detecting AKI involved CKD, HF, sepsis, admission type, sCr at admission, and APACHE II  
53  
54 scores (Table 3). The cross-validated baseline performance characterized by accuracy and  
55  
56  
57  
58  
59  
60



1  
2  
3  
4 Kappa for the clinical model was 0.844 and 0.448.  
5

6 To evaluate the enhancement of discriminative capacity, a panel of NT-proBNP and sCysC  
7  
8 was introduced to the above-mentioned model. As shown in Table 5, compared with the clinical  
9  
10 model, the addition of NT-proBNP to the clinical model had a higher AUC-ROC ( $P < 0.05$ ),  
11  
12 and no statistically significant variation existed when sCyC was added to the clinical model.  
13  
14 However, the risk reclassification was markedly improved through the addition of NT-proBNP  
15  
16 or sCyC to the clinical model, as measured by category-free NRI and IDI ( $P < 0.05$ ). Adding  
17  
18 NT-proBNP and sCysC to a clinical model for AKI detection further increased the AUC-ROC  
19  
20 to 0.859 beyond that of the clinical model with or without sCysC ( $P < 0.05$ ) (Figure 3). The  
21  
22 cross-validated baseline performance characterized by accuracy and Kappa for the clinical  
23  
24 model enriched with NTproBNP and Cystatin C was 0.848 and 0.475. Moreover, this panel  
25  
26 addition to the clinical model significantly enhanced the risk reclassification of AKI beyond  
27  
28 that of the clinical model with or without any individual biomarkers ( $P < 0.05$ ), with maximum  
29  
30 NRI (0.531) and IDI (0.038).  
31  
32  
33  
34  
35  
36  
37  
38  
39  
40  
41  
42  
43  
44  
45  
46  
47  
48  
49  
50  
51  
52  
53  
54  
55  
56  
57  
58  
59  
60

**Table 1** Clinical data and outcomes

| Characteristics                              | Total (n=1222)            | AKI (n=256)                 | No AKI (n=966)            | P value |
|----------------------------------------------|---------------------------|-----------------------------|---------------------------|---------|
| Age, years                                   | 57 (45-67)                | 63.5 (52-72)                | 55 (44-65)                | <0.001  |
| Male, n (%)                                  | 666 (54.5)                | 151 (59.0)                  | 515 (53.3)                | 0.105   |
| BMI, kg/m <sup>2</sup>                       | 22 (19.6-24.7)            | 22.3 (19.9-25.0)            | 21.9 (19.6-24.6)          | 0.395   |
| <b>Preexisting clinical conditions</b>       |                           |                             |                           |         |
| Hypertension, n (%)                          | 252 (20.6)                | 81 (31.6)                   | 171 (17.7)                | <0.001  |
| Diabetes mellitus, n (%)                     | 121 (9.9)                 | 52 (20.3)                   | 69 (7.1)                  | <0.001  |
| Chronic kidney disease, n (%)                | 26 (2.1)                  | 21 (8.2)                    | 5 (0.5)                   | <0.001  |
| Cerebrovascular disease, n (%)               | 127 (10.4)                | 50 (19.5)                   | 77 (8.0)                  | <0.001  |
| Chronic obstructive pulmonary disease, n (%) | 35 (2.9)                  | 18 (7.0)                    | 17 (1.8)                  | <0.001  |
| Coronary artery disease, n (%)               | 53 (4.3)                  | 24 (9.4)                    | 29 (3.0)                  | <0.001  |
| Heart failure, n (%)                         | 31 (2.5)                  | 22 (8.6)                    | 9 (0.9)                   | <0.001  |
| Cancer, n (%)                                | 227 (18.6)                | 50 (19.5)                   | 177 (18.3)                | 0.659   |
| Sepsis, n (%)                                | 98 (8.0)                  | 70 (27.3)                   | 28 (2.9)                  | <0.001  |
| <b>Admission type, n (%)</b>                 |                           |                             |                           |         |
| Elective surgical, n (%)                     | 863 (70.6)                | 84 (32.8)                   | 779 (80.6)                | <0.001  |
| Emergency surgical, n (%)                    | 83 (6.8)                  | 33 (12.9)                   | 50 (5.2)                  | <0.001  |
| Medical, n (%)                               | 276 (22.6)                | 139 (54.3)                  | 137 (14.2)                | <0.001  |
| Baseline serum creatinine, mg/dL             | 0.78 (0.64-0.96)          | 0.76 (0.58-1.09)            | 0.79 (0.65-0.94)          | 0.949   |
| Baseline eGFR, mL/min/1.73 m <sup>2</sup>    | 119.4 (97.6-145.4)        | 122.9 (83.3-158.7)          | 118.7 (100.4-142.9)       | 0.950   |
| <b>Parameters at ICU admission</b>           |                           |                             |                           |         |
| Cr, mg/dl                                    | 0.87 (0.72-1.07)          | 0.97 (0.72-1.55)            | 0.85 (0.72-1.02)          | <0.001  |
| NT-proBNP, pg/mL                             | 97.1 (29.4-464.4)         | 871.0 (225.8-2919.3)        | 66.2 (23.7-206.2)         | <0.001  |
| sCysC, mg/L                                  | 0.78 (0.61-1.06)          | 1.15 (0.83-1.85)            | 0.75 (0.58-0.94)          | <0.001  |
| APACHE II score                              | 7 (4-10)                  | 11 (8-16)                   | 6 (4-9)                   | <0.001  |
| UP, ml/kg/h                                  | 1.67 (1.20-2.26)          | 1.37 (0.89-2.20)            | 1.73 (1.26-2.27)          | <0.001  |
| <b>Outcomes</b>                              |                           |                             |                           |         |
| ICU mortality, n (%)                         | 40 (3.3)                  | 33 (12.9)                   | 7 (0.7)                   | <0.001  |
| In-hospital mortality, n (%)                 | 53 (4.3)                  | 40 (15.6)                   | 13 (1.3)                  | <0.001  |
| ICU stay, days                               | 2 (2-4)                   | 6 (3-13.3)                  | 2 (2-3)                   | <0.001  |
| Hospital stay, days                          | 16 (12-23)                | 22 (13-33.3)                | 15 (11-21)                | <0.001  |
| ICU costs, CNY                               | 39461.7 (28966.2-59437.2) | 66140.1 (36526.0-131843.8)  | 37667.5 (27881.5-48238.4) | <0.001  |
| Total costs, CNY                             | 58295.3 (44201.6-98602.8) | 128945.6 (71506.8-199685.4) | 52773.8 (40856.2-78718.9) | <0.001  |

Abbreviations: AKI, acute kidney injury; BMI, body mass index; eGFR, estimated glomerular filtration rate; ICU, intensive care unit; sCr, serum creatinine, NT-proBNP, N-terminal pro-B-type natriuretic peptide; sCysC, serum cystatin C; APACHE II score, acute physiology and chronic health evaluation II score; UP, Urine production first 24 h after admission; CNY, Chinese yuan.

Continuous variables are expressed as mean  $\pm$  standard deviation or median (25th to 75th percentile, interquartile range). Categorical variables are expressed as a n (%).

**Table 2** Detective characteristics of the two biomarkers for AKI

| Logistic regression models | AUC-ROC <sup>a</sup> (95%CI)     | Cutoff <sup>b</sup> | Sensitivity | Specificity | (+) LR | (-) LR | PPV  | NPV  |
|----------------------------|----------------------------------|---------------------|-------------|-------------|--------|--------|------|------|
| sCysC                      | 0.766 (0.741-0.789)              | 1.02 mg/L           | 0.66        | 0.80        | 3.28   | 0.43   | 0.47 | 0.90 |
| NT-proBNP                  | 0.821 (0.799-0.842) <sup>c</sup> | 204.00 pg/mL        | 0.78        | 0.75        | 3.12   | 0.29   | 0.45 | 0.93 |
| NT-proBNP+ sCysC           | 0.832 (0.809-0.852) <sup>d</sup> | 0.15 <sup>e</sup>   | 0.84        | 0.69        | 2.69   | 0.23   | 0.42 | 0.94 |

Abbreviations: AKI, acute kidney injury; AUC-ROC, area under the receiver operating characteristic curve; CI, confidence interval; (+) LR, Positive likelihood ratio; (-) LR, negative likelihood ratio; PPV, Positive predictive value; NPV, Negative predictive value; sCysC, Serum cystatin C; NT-proBNP, N-terminal pro-B-type natriuretic peptide.

<sup>a</sup> Values are presented as AUC-ROC (95% CI)

<sup>b</sup> Ideal cutoff value according to Youden's index

<sup>c</sup>  $P < 0.05$  vs. sCysC ( $P=0.0011$ )

<sup>d</sup>  $P < 0.05$  vs. NT-proBNP ( $P=0.0145$ ), sCysC ( $P<0.0001$ )

<sup>e</sup> Cutoff points of the biomarker panels were the predicted probabilities generated from the multiple logistic regression model

**Table 3** Logistic analyses of clinical risk factors for AKI detection

| Variables                             | Univariate analysis   |                | Multivariate model   |                |
|---------------------------------------|-----------------------|----------------|----------------------|----------------|
|                                       | OR (95% CI)           | <i>P</i> value | OR (95% CI)          | <i>P</i> value |
| Age                                   | 1.029 (1.019-1.038)   | <0.001         |                      |                |
| Hypertension                          | 2.152 (1.577-2.937)   | <0.001         |                      |                |
| Diabetes mellitus                     | 3.314 (2.242-4.898)   | <0.001         |                      |                |
| Chronic kidney disease                | 17.175 (6.410-46.023) | <0.001         | 4.182 (1.250-13.998) | 0.020          |
| Cerebrovascular disease               | 2.802 (1.903-4.126)   | <0.001         |                      |                |
| Chronic obstructive pulmonary disease | 4.222 (2.143-8.316)   | <0.001         |                      |                |
| Coronary artery disease               | 3.342 (1.910-5.849)   | <0.001         |                      |                |
| Heart failure                         | 9.997 (4.544-21.997)  | <0.001         | 3.487 (1.365-8.911)  | 0.009          |
| Sepsis                                | 12.608 (7.914-20.084) | <0.001         | 5.033 (2.914-8.692)  | <0.001         |
| Admission type                        |                       | <0.001         |                      | <0.001         |
| Elective surgical                     | 1.0 (Referent)        |                | 1.0 (Referent)       |                |
| Emergency surgical                    | 6.121 (3.735-10.030)  | <0.001         | 3.493 (2.023-6.032)  | <0.001         |
| Medical                               | 9.409 (6.791-13.037)  | <0.001         | 3.237 (2.157-4.858)  | <0.001         |
| sCr                                   | 3.135 (2.385-4.120)   | <0.001         | 1.538 (1.149-2.058)  | 0.004          |
| APACHE II score                       | 1.215 (1.182-1.249)   | <0.001         | 1.101 (1.066-1.137)  | <0.001         |

Abbreviations: AKI, acute kidney injury; OR, odds ratio; CI, confidence interval; sCr, serum creatinine; APACHE II score, acute physiology and chronic health evaluation II score.

**Table 4** Multivariate logistic regression analyses of the two biomarkers for AKI detection

| Variables                                    | AKI, % | Unadjusted OR (95% CI) | P value | Adjusted OR <sup>a</sup> (95% CI) | P value |
|----------------------------------------------|--------|------------------------|---------|-----------------------------------|---------|
| NT-proBNP (pg/mL, n)                         |        |                        |         |                                   |         |
| <204, 779                                    | 7.2    | 1.0 (Referent)         |         | 1.0 (Referent)                    |         |
| ≥204, 443                                    | 45.1   | 10.626 (7.639-14.781)  | <0.001  | 3.460 (2.307-5.189)               | <0.001  |
| sCysC layered by the cut-off value (mg/L, n) |        |                        |         |                                   |         |
| <1.02, 861                                   | 10.2   | 1.0 (Referent)         |         | 1.0 (Referent)                    |         |
| ≥1.02, 361                                   | 46.5   | 7.646 (5.651-10.345)   | <0.001  | 2.649 (1.842-3.810)               | <0.001  |

Abbreviations: AKI, acute kidney injury; OR, odds ratio; CI, confidence interval, NT-proBNP, N-terminal pro-B-type natriuretic peptide; sCysC, Serum cystatin C.

<sup>a</sup> Adjusted for chronic kidney disease, heart failure, sepsis, admission type, serum creatinine at admission and acute physiology and chronic health evaluation II score.

**Table 5** Discrimination and reclassification of the combination of biomarkers and clinical model for AKI

|                                                                     | AUC-ROC (95%CI)     | <i>P</i> value <sup>a</sup> | Category-Free NRI (95%CI) | <i>P</i> value <sup>a</sup> | IDI (95%CI)         | <i>P</i> value <sup>a</sup> |
|---------------------------------------------------------------------|---------------------|-----------------------------|---------------------------|-----------------------------|---------------------|-----------------------------|
| Clinical model <sup>b</sup>                                         | 0.840 (0.812-0.868) |                             |                           |                             |                     |                             |
| Clinical model + sCysC                                              | 0.847 (0.819-0.874) | 0.163                       | 0.193 (0.052-0.405)       | 0.036                       | 0.017 (0.009-0.026) | <0.001                      |
| Clinical model + NT-proBNP                                          | 0.855 (0.828-0.882) | 0.013                       | 0.462 (0.196-0.747)       | 0.001                       | 0.028 (0.016-0.039) | <0.001                      |
| Clinical model + NT-proBNP + sCysC                                  | 0.859 (0.832-0.885) | 0.006                       | 0.531 (0.238-0.741)       | <0.001                      | 0.038 (0.025-0.051) | <0.001                      |
| Clinical model + NT-proBNP + sCysC vs<br>Clinical model + sCysC     | -                   | 0.015                       | 0.328 (0.139-0.553)       | 0.002                       | 0.021 (0.010-0.031) | <0.001                      |
| Clinical model + NT-proBNP + sCysC vs<br>Clinical model + NT-proBNP | -                   | 0.223                       | 0.167 (0.013-0.285)       | 0.017                       | 0.011 (0.004-0.018) | 0.003                       |

Abbreviations: AUC-ROC, area under the receiver operating characteristic curve; NRI, net reclassification index; IDI, incremental discrimination improvement; AKI, acute kidney injury; CI, confidence interval; sCysC, serum cystatin C; NT-proBNP, N-terminal pro-B-type natriuretic peptide.

a Biomarker + clinical model versus clinical model.

b The clinical model for detecting AKI is composed of chronic kidney disease, heart failure, sepsis, Admission type, serum creatinine at admission and acute physiology and chronic health evaluation II score.

Hosmer–Lemeshow goodness-of-fit test: for clinical model, chi-squared value=14.249(P=0.075); for clinical model + sCysC, chi-squared value=6.971 (P=0.54); for clinical model + NT-proBNP, chi-squared value=9.362 (P=0.313); or clinical model + NT-proBNP +sCysC, chi-squared value=4.245 (P=0.834).

## Discussion

The study's key finding was that the combination of NT-proBNP and sCysC yields greater discriminative ability for AKI detection at ICU admission with or without a clinical model in critically ill adults. The finding indicates that assessing both serum NT-proBNP and sCysC levels on admission may assist with the early diagnosis and risk stratification of AKI in critically ill adults.

One of the most prevalent complications occurring in a variety of clinical settings is AKI, especially for critically ill patients<sup>[4, 6, 36, 37]</sup>. The development of AKI, as the same as its severity, is strongly associated with increased mortality<sup>[3, 36]</sup>. However, early identification is challenging when sCr or urine production changes are used to detect AKI<sup>[38]</sup>, and precise clinical predictors are not widely known. Numerous studies have found and confirmed the accuracy and additional clinical benefits of these renal biomarkers for early AKI diagnosis, such as insulin-like growth factor-binding protein, matrix metalloproteinase-7, tissue inhibitor metalloproteinase-2, angiotensinogen, sCysC, neutrophil gelatinase-associated lipocalin and so on<sup>[5, 9, 12, 39, 40]</sup>. However, some novel biomarkers are not being used in clinical practice, due to insufficient evidence or previously unavailable commercially. Thus, the rational application of clinically available biomarkers is more practical and economical.

NT-proBNP, a widely used marker of hemodynamic stress, is a polypeptide secreted by the ventricles and its role is to facilitate natriuresis<sup>[17, 41]</sup>. In patients with elevated CVP, the raised pressure may be transmitted to the renal veins, resulting in renal congestion and reduced glomerular filtration<sup>[14, 42, 43]</sup>. It makes sense that NT-proBNP is associated with the development of AKI. The clinical application of serum NT-proBNP in cardiac disease has been

1  
2  
3  
4 extensively confirmed and finds its predictive value for AKI development in patients with HF,  
5  
6 coronary angiography, or percutaneous coronary intervention [19, 23, 44, 45]. Several studies have  
7  
8 elucidated the link between NT-proBNP and AKI incidence after cardiac or noncardiac  
9  
10 surgery<sup>[13, 46-48]</sup>. However, its utility for AKI detection has not been fully evaluated in general  
11  
12 ICU, and it is necessary to verify the reliability and universality of NT-proBNP in  
13  
14 heterogeneous populations. The data demonstrated herein not only maintain NT-proBNP as a  
15  
16 risk factor for AKI but also indicate that it can enhance the risk reclassification and  
17  
18 discrimination for AKI in ICU.  
19  
20  
21  
22  
23

24  
25 A single biomarker is insufficient to express the multiple pathophysiological mechanisms of  
26  
27 AKI, especially for critically ill patients, as AKI is a heterogeneous syndrome<sup>[9, 10]</sup>. There is no  
28  
29 consensus on which specific markers should be combined to detect AKI. Numerous studies  
30  
31 have revealed that combining different biomarkers utilized to detect AKI can improve  
32  
33 predictive abilities<sup>[5, 49, 50]</sup>. Naruse et al. showed that combining urinary liver-type fatty-acid  
34  
35 binding protein and serum NT-proBNP can enhance early prediction of AKI in patients in  
36  
37 medical cardiac ICUs<sup>[15]</sup>. Similar to such studies, we identified that the combination of two  
38  
39 markers, serum NT-proBNP and sCysC, improved the diagnostic performance of AKI.  
40  
41  
42  
43  
44

45  
46 CysC is a glomerular filtration biomarker that can be utilized to anticipate the development  
47  
48 of AKI and undesirable outcomes<sup>[8, 9]</sup>. The application and performance of CysC for AKI  
49  
50 prediction have been demonstrated in various clinical settings<sup>[5, 11, 51-53]</sup>. In individuals with ST-  
51  
52 segment elevation myocardial infarction, a combination of B-type natriuretic peptide and CysC  
53  
54 may contribute to risk stratification for AKI<sup>[25]</sup>. In the present cohort, sCysC had a slightly  
55  
56 higher specificity than NT-proBNP in the detection of AKI, but its sensitivity is limited. The  
57  
58  
59  
60



1  
2  
3  
4 ability of sCysC for detecting AKI was fine, but its AUC-ROC was not as great as NT-proBNP.  
5  
6 Moreover, the combination of serum NT-proBNP and sCysC at ICU admission had the highest  
7  
8 AUC-ROC. These data indicate that the simultaneous measurement of serum NT-proBNP and  
9  
10 sCysC at ICU admission could improve the early identification of AKI.  
11  
12

13  
14 Biomarkers for AKI, which indicates the various underlying pathophysiological mechanisms  
15  
16 involved in AKI incidence, might be superior to individual biomarkers alone<sup>[3, 6]</sup>. It is also  
17  
18 important that these biomarkers profit from being easily measurable, readily accessible,  
19  
20 comparatively cheap, and with an elevated level of sensitivity and specificity. In the present  
21  
22 study, for AKI detection NT-proBNP acted as a hemodynamic stress biomarker with high  
23  
24 sensitivity and specificity, and sCysC had high specificity as a functional biomarker. Even after  
25  
26 clinical risk variables adjustment, elevated NT-proBNP is an independent risk factor for AKI.  
27  
28 The NT-proBNP addition to the clinical model significantly enhanced risk reclassification, as  
29  
30 demonstrated by category-free NRI and IDI. Moreover, our results identified that the addition  
31  
32 of NT-proBNP to sCysC markedly improved their detective abilities as biomarkers. Adding  
33  
34 biomarkers to the clinical model further improved the diagnostic accuracy of AKI, as measured  
35  
36 by AUC-ROCs. These data suggest that a single biomarker is insufficient for early diagnosis of  
37  
38 AKI. Therefore, the method of combining different biomarkers may be of greater use.  
39  
40  
41  
42  
43  
44  
45  
46

47  
48 There are some limitations for this study. First, it was a single-center study, with an unproven  
49  
50 external validity. Second, there were only 26 patients with CKD patients and 31 HF patients  
51  
52 enrolled, and hence we were unable to stratify our group relying on eGFR or cardiac function  
53  
54 at baseline. Accordingly, future studies should be administrated in these subgroups. Last, we  
55  
56 did not accomplish routine echocardiography in all patients to associate NT-proBNP levels with  
57  
58  
59  
60

1  
2  
3  
4 ventricular dilatation or other pathways that may promote NT-proBNP release. Despite these  
5  
6 limitations, we believe that our findings have clinical implications and should facilitate further  
7  
8 research to confirm our results.  
9

## 10 **Conclusion**

11  
12 In the present cohort, simultaneous measurement of NT-proBNP and sCysC at ICU admission  
13  
14 increases the early identification of AKI beyond that of biomarker in isolation, and that the  
15  
16 combination of the two biomarkers and clinical risk factors improves the discriminative ability  
17  
18 for AKI detection in critically ill adults.  
19  
20  
21  
22  
23  
24  
25  
26  
27  
28  
29  
30  
31  
32  
33  
34  
35  
36  
37  
38  
39  
40  
41  
42  
43  
44  
45  
46  
47  
48  
49  
50  
51  
52  
53  
54  
55  
56  
57  
58  
59  
60

## Abbreviations

(-) LR, negative likelihood ratios

(+) LR, positive likelihood ratios

AKI, Acute kidney injury

APACHE II score, Acute Physiology and Chronic Health Evaluation II score

AUC-ROC, area under the receiver operating characteristic curve

BMI, body mass index

CAD, coronary artery disease

CI, confidence interval

CNY, Chinese yuan

CKD, chronic kidney disease

CKD-EPI, Chronic Kidney Disease Epidemiology Collaboration

COPD, chronic obstructive pulmonary disease

DM, diabetes mellitus

eGFR, estimated glomerular filtration rate

ESRD, end-stage renal disease

HF, heart failure

ICU, intensive care unit

IDI, incremental discrimination improvement

KDIGO, Kidney Disease Improving Global Outcomes

NPV, negative predictive values

NRI net reclassification index

1  
2  
3  
4 NT-proBNP, N-terminal pro-B-type natriuretic peptide  
5

6 ORs, odds ratios  
7

8  
9 PPV, positive predictive values  
10

11 RRT, renal replacement therapy  
12

13  
14 sCr, serum creatinine  
15

16  
17 sCysC, serum cystatin C  
18

19 UP, Urine production first 24 h after admission  
20  
21  
22  
23

## 24 **Acknowledgements**

25  
26  
27 The authors thank all the doctors, nurses, technicians, and patients at the Guangdong Provincial  
28  
29 People's Hospital for their dedication in the study.  
30  
31  
32  
33  
34

## 35 **Authors' contributions**

36  
37 JD, LLH, YFL and LHH equally contributed to the design of the research, analysis and  
38  
39 interpretation of the data. CBC and JD contributed to the conception and design of the research  
40  
41 as well as interpretation of the data, and critically revised the manuscript. JD, LLH, YFL, LHH,  
42  
43 JX, HF and YL performed the research and collected data. All authors contributed to the  
44  
45 acquisition and analysis of the data, drafted the manuscript, and agree to be fully accountable  
46  
47 for ensuring the integrity and accuracy of the work. All authors read and approved the final  
48  
49 manuscript.  
50  
51  
52  
53  
54  
55  
56  
57  
58  
59  
60

## **Funding**

The study was supported by Chunbo Chen's research grants from the National Natural Science Foundation of China [82172162], the Major Program of Summit Project, Guangdong Province High-level Hospital Construction Project of Guangdong Provincial People's Hospital, Guangdong Academy of Medical Sciences [DFJH2020028] and the Office of Talent Work Leading Group in Maoming (number of MaoRenCaiBan [2020]24).

## **Availability of data and materials**

The datasets generated and/or analyzed during this study are not publicly available, owing to currently ongoing research studies, but the data are available from the corresponding author on reasonable request.

## **Ethics approval and consent to participate**

The ethics committee of the Guangdong Provincial People's Hospital approved the study design, protocol, ethical issue, and data and sample collection (No. GDREC2015396H(R1)). Written informed consent was obtained from each patient or from the appropriate surrogates.

## **Patient consent for publication**

Not required.

## **Consent for publication**

Not applicable. No individual personal data are included in the study. All patients provided necessary consent to participate in the present study.

## **Competing interests**

1  
2  
3  
4 The authors declare that they have no competing interests.  
5  
6  
7  
8

9  
10 **Uncategorized References**  
11

- 12  
13 1. Hoste EA, Bagshaw SM, Bellomo R, Cely CM, Colman R, Cruz DN, Edipidis K, Forni LG,  
14  
15 Gomersall CD, Govil D *et al*: **Epidemiology of acute kidney injury in critically ill patients: the**  
16  
17 **multinational AKI-EPI study**. *Intensive care medicine* 2015, **41**(8):1411-1423.  
18  
19  
20 2. Srisawat N, Kulvichit W, Mahamitra N, Hurst C, Praditpornsilpa K, Lumlertgul N, Chuasuwan A,  
21  
22 Trongtrakul K, Tasnarong A, Champunot R *et al*: **The epidemiology and characteristics of acute**  
23  
24 **kidney injury in the Southeast Asia intensive care unit: a prospective multicentre study**.  
25  
26 *Nephrology, dialysis, transplantation : official publication of the European Dialysis and*  
27  
28 *Transplant Association - European Renal Association* 2020, **35**(10):1729-1738.  
29  
30  
31 3. Ronco C, Bellomo R, Kellum JA: **Acute kidney injury**. *Lancet (London, England)* 2019,  
32  
33 **394**(10212):1949-1964.  
34  
35  
36 4. Levey AS, James MT: **Acute Kidney Injury**. *Annals of internal medicine* 2017, **167**(9):itc66-itc80.  
37  
38  
39 5. Deng Y, Chi R, Chen S, Ye H, Yuan J, Wang L, Zhai Y, Gao L, Zhang D, Hu L *et al*: **Evaluation**  
40  
41 **of clinically available renal biomarkers in critically ill adults: a prospective multicenter**  
42  
43 **observational study**. *Critical care (London, England)* 2017, **21**(1):46.  
44  
45  
46 6. Liu KD, Goldstein SL, Vijayan A, Parikh CR, Kashani K, Okusa MD, Agarwal A, Cerdá J:  
47  
48 **AKI!Now Initiative: Recommendations for Awareness, Recognition, and Management of AKI**.  
49  
50 *Clinical journal of the American Society of Nephrology : CJASN* 2020, **15**(12):1838-1847.  
51  
52  
53 7. **Kidney Disease: Improving Global Outcomes (KDIGO) Acute Kidney Injury Work Group. KDIGO**  
54  
55 **Clinical Practice Guideline for Acute Kidney Injury**. 2012.  
56  
57  
58  
59  
60

- 1  
2  
3  
4 8. Teo SH, Endre ZH: **Biomarkers in acute kidney injury (AKI)**. *Best practice & research Clinical*  
5  
6 *anaesthesiology* 2017, **31**(3):331-344.  
7  
8  
9 9. Albert C, Haase M, Albert A, Zapf A, Braun-Dullaeus RC, Haase-Fielitz A: **Biomarker-Guided**  
10  
11 **Risk Assessment for Acute Kidney Injury: Time for Clinical Implementation?** *Annals of laboratory*  
12  
13 *medicine* 2021, **41**(1):1-15.  
14  
15  
16 10. McCullough PA, Shaw AD, Haase M, Bouchard J, Waikar SS, Siew ED, Murray PT, Mehta RL,  
17  
18 Ronco C: **Diagnosis of acute kidney injury using functional and injury biomarkers: workgroup**  
19  
20 **statements from the tenth Acute Dialysis Quality Initiative Consensus Conference**. *Contributions*  
21  
22 *to nephrology* 2013, **182**:13-29.  
23  
24  
25 11. Deng Y, Ma J, Hou Y, Zhou D, Hou T, Li J, Liang S, Tan N, Chen C: **Combining Serum Cystatin**  
26  
27 **C and Urinary N-Acetyl-Beta-D-Glucosaminidase Improves the Precision for Acute Kidney**  
28  
29 **Injury Diagnosis after Resection of Intracranial Space-Occupying Lesions**. *Kidney & blood*  
30  
31 *pressure research* 2020, **45**(1):142-156.  
32  
33  
34 12. Yang X, Chen C, Tian J, Zha Y, Xiong Y, Sun Z, Chen P, Li J, Yang T, Ma C *et al*: **Urinary**  
35  
36 **Angiotensinogen Level Predicts AKI in Acute Decompensated Heart Failure: A Prospective,**  
37  
38 **Two-Stage Study**. *Journal of the American Society of Nephrology : JASN* 2015, **26**(8):2032-  
39  
40 2041.  
41  
42  
43 13. Cardinale D, Cosentino N, Moltrasio M, Sandri MT, Petrella F, Colombo A, Bacchiani G,  
44  
45 Tessitore A, Bonomi A, Veglia F *et al*: **Acute kidney injury after lung cancer surgery: Incidence**  
46  
47 **and clinical relevance, predictors, and role of N-terminal pro B-type natriuretic peptide**. *Lung*  
48  
49 *cancer (Amsterdam, Netherlands)* 2018, **123**:155-159.  
50  
51  
52  
53 14. Haines R, Crichton S, Wilson J, Treacher D, Ostermann M: **Cardiac biomarkers are associated**  
54  
55  
56  
57  
58  
59  
60

- 1  
2  
3  
4 with maximum stage of acute kidney injury in critically ill patients: a prospective analysis. *Critical*  
5  
6 *care (London, England)* 2017, **21**(1):88.  
7  
8
- 9 15. Naruse H, Ishii J, Takahashi H, Kitagawa F, Nishimura H, Kawai H, Muramatsu T, Harada M,  
10  
11 Yamada A, Motoyama S *et al.* Predicting acute kidney injury using urinary liver-type fatty-acid  
12  
13 binding protein and serum N-terminal pro-B-type natriuretic peptide levels in patients treated at  
14  
15 medical cardiac intensive care units. *Critical care (London, England)* 2018, **22**(1):197.  
16  
17
- 18 16. Schaub JA, Coca SG, Moledina DG, Gentry M, Testani JM, Parikh CR: Amino-Terminal Pro-B-  
19  
20 Type Natriuretic Peptide for Diagnosis and Prognosis in Patients With Renal Dysfunction: A  
21  
22 Systematic Review and Meta-Analysis. *JACC Heart failure* 2015, **3**(12):977-989.  
23  
24  
25
- 26 17. Wiese S, Breyer T, Dragu A, Wakili R, Burkard T, Schmidt-Schweda S, Füchtbauer EM,  
27  
28 Dohrmann U, Beyersdorf F, Radicke D *et al.* Gene expression of brain natriuretic peptide in  
29  
30 isolated atrial and ventricular human myocardium: influence of angiotensin II and diastolic fiber  
31  
32 length. *Circulation* 2000, **102**(25):3074-3079.  
33  
34  
35
- 36 18. Damman K, Testani JM: The kidney in heart failure: an update. *European heart journal* 2015,  
37  
38 **36**(23):1437-1444.  
39  
40  
41
- 42 19. Goussot S, Mousson C, Guenancia C, Stamboul K, Brunel P, Brunet D, Touzery C, Cottin Y,  
43  
44 Zeller M: N-Terminal Fragment of Pro B-type Natriuretic Peptide as a Marker of Contrast-  
45  
46 Induced Nephropathy After Primary Percutaneous Coronary Intervention for ST-Segment  
47  
48 Elevation Myocardial Infarction. *The American journal of cardiology* 2015, **116**(6):865-871.  
49  
50  
51
- 52 20. Yamashita T, Seino Y, Ogawa A, Ogata K, Fukushima M, Tanaka K, Mizuno K: N-terminal pro-  
53  
54 BNP is a novel biomarker for integrated cardio-renal burden and early risk stratification in  
55  
56 patients admitted for cardiac emergency. *Journal of cardiology* 2010, **55**(3):377-383.  
57  
58  
59  
60



- 1  
2  
3  
4 21. Herget-Rosenthal S, Marggraf G, Hüsing J, Göring F, Pietruck F, Janssen O, Philipp T, Kribben  
5  
6 A: **Early detection of acute renal failure by serum cystatin C.** *Kidney international* 2004,  
7  
8 **66(3):1115-1122.**  
9  
10  
11 22. Carrasco-Sánchez FJ, Pérez-Calvo JI, Morales-Rull JL, Galisteo-Almeda L, Páez-Rubio I,  
12  
13 Barón-Franco B, Aguayo-Canela M, Pujol-De la llave E: **Heart failure mortality according to**  
14  
15 **acute variations in N-terminal pro B-type natriuretic peptide and cystatin C levels.** *Journal of*  
16  
17 *cardiovascular medicine (Hagerstown, Md)* 2014, **15(2):115-121.**  
18  
19  
20 23. Linzbach S, Samigullin A, Yilmaz S, Tsioga M, Zeiher AM, Spyridopoulos I: **Role of N-terminal**  
21  
22 **pro-brain natriuretic peptide and cystatin C to estimate renal function in patients with and without**  
23  
24 **heart failure.** *The American journal of cardiology* 2009, **103(8):1128-1133.**  
25  
26  
27 24. Ruan ZB, Zhu L, Yin YG, Chen GC: **Cystatin C, N-terminal probrain natriuretic peptides and**  
28  
29 **outcomes in acute heart failure with acute kidney injury in a 12-month follow-up: Insights into**  
30  
31 **the cardiorenal syndrome.** *Journal of research in medical sciences : the official journal of Isfahan*  
32  
33 *University of Medical Sciences* 2014, **19(5):404-409.**  
34  
35  
36 25. Tung YC, Chang CH, Chen YC, Chu PH: **Combined biomarker analysis for risk of acute kidney**  
37  
38 **injury in patients with ST-segment elevation myocardial infarction.** *PloS one* 2015,  
39  
40 **10(4):e0125282.**  
41  
42  
43 26. Wang C, Han S, Tong F, Li Y, Li Z, Sun Z: **Predictive Value of the Serum Cystatin C/Prealbumin**  
44  
45 **Ratio in Combination With NT-proBNP Levels for Long-Term Prognosis in Chronic Heart Failure**  
46  
47 **Patients: A Retrospective Cohort Study.** *Frontiers in cardiovascular medicine* 2021, **8:684919.**  
48  
49  
50 27. von Elm E, Altman DG, Egger M, Pocock SJ, Gøtzsche PC, Vandenbroucke JP: **The**  
51  
52 **Strengthening the Reporting of Observational Studies in Epidemiology (STROBE) statement:**  
53  
54  
55  
56  
57  
58  
59  
60

- 1  
2  
3  
4 **guidelines for reporting observational studies.** *Annals of internal medicine* 2007, **147**(8):573-577.  
5  
6  
7 28. Bossuyt PM, Reitsma JB, Bruns DE, Gatsonis CA, Glasziou PP, Irwig LM, Lijmer JG, Moher D,  
8  
9 Rennie D, de Vet HC: **Toward complete and accurate reporting of studies of diagnostic accuracy:**  
10  
11 **the STARD initiative.** *Academic radiology* 2003, **10**(6):664-669.  
12  
13  
14 29. Levey AS, Stevens LA, Schmid CH, Zhang YL, Castro AF, 3rd, Feldman HI, Kusek JW, Eggers  
15  
16 P, Van Lente F, Greene T *et al.* **A new equation to estimate glomerular filtration rate.** *Annals of*  
17  
18 *internal medicine* 2009, **150**(9):604-612.  
19  
20  
21  
22 30. Endre ZH, Walker RJ, Pickering JW, Shaw GM, Frampton CM, Henderson SJ, Hutchison R,  
23  
24 Mehrtens JE, Robinson JM, Schollum JB *et al.* **Early intervention with erythropoietin does not**  
25  
26 **affect the outcome of acute kidney injury (the EARLYARF trial).** *Kidney international* 2010,  
27  
28 **77**(11):1020-1030.  
29  
30  
31  
32 31. DeLong ER, DeLong DM, Clarke-Pearson DL: **Comparing the areas under two or more**  
33  
34 **correlated receiver operating characteristic curves: a nonparametric approach.** *Biometrics* 1988,  
35  
36 **44**(3):837-845.  
37  
38  
39  
40 32. Youden WJ: **Index for rating diagnostic tests.** *Cancer* 1950, **3**(1):32-35.  
41  
42  
43 33. Cook NR: **Statistical evaluation of prognostic versus diagnostic models: beyond the ROC curve.**  
44  
45 *Clinical chemistry* 2008, **54**(1):17-23.  
46  
47  
48 34. Pencina MJ, D'Agostino RB, Sr., D'Agostino RB, Jr., Vasan RS: **Evaluating the added predictive**  
49  
50 **ability of a new marker: from area under the ROC curve to reclassification and beyond.** *Statistics*  
51  
52 *in medicine* 2008, **27**(2):157-172; discussion 207-112.  
53  
54  
55  
56 35. Albert C, Haase M, Albert A, Kropf S, Bellomo R, Westphal S, Westerman M, Braun-Dullaeus  
57  
58 RC, Haase-Fielitz A: **Urinary Biomarkers may Complement the Cleveland Score for Prediction**  
59  
60

- 1  
2  
3  
4 **of Adverse Kidney Events After Cardiac Surgery: A Pilot Study.** *Annals of laboratory medicine*  
5  
6 2020, **40**(2):131-141.  
7  
8
- 9 36. Xu X, Nie S, Liu Z, Chen C, Xu G, Zha Y, Qian J, Liu B, Han S, Xu A *et al.* **Epidemiology and**  
10  
11 **Clinical Correlates of AKI in Chinese Hospitalized Adults.** *Clinical journal of the American*  
12  
13 *Society of Nephrology : CJASN* 2015, **10**(9):1510-1518.  
14  
15
- 16 37. Xu X, Nie S, Zhang A, Mao J, Liu HP, Xia H, Xu H, Liu Z, Feng S, Zhou W *et al.* **Acute Kidney**  
17  
18 **Injury among Hospitalized Children in China.** *Clinical journal of the American Society of*  
19  
20 *Nephrology : CJASN* 2018, **13**(12):1791-1800.  
21  
22
- 23 38. Martins CB, De Bels D, Honore PM, Redant S: **Early Prediction of Acute Kidney Injury by**  
24  
25 **Machine Learning: Should We Add the Urine Output Criterion to Improve this New Tool?** *Journal*  
26  
27 *of translational internal medicine* 2020, **8**(4):201-202.  
28  
29
- 30 39. Chen C, Yang X, Lei Y, Zha Y, Liu H, Ma C, Tian J, Chen P, Yang T, Hou FF: **Urinary Biomarkers**  
31  
32 **at the Time of AKI Diagnosis as Predictors of Progression of AKI among Patients with Acute**  
33  
34 **Cardiorenal Syndrome.** *Clinical journal of the American Society of Nephrology : CJASN* 2016,  
35  
36 **11**(9):1536-1544.  
37  
38
- 39 40. Yang X, Chen C, Teng S, Fu X, Zha Y, Liu H, Wang L, Tian J, Zhang X, Liu Y *et al.* **Urinary**  
40  
41 **Matrix Metalloproteinase-7 Predicts Severe AKI and Poor Outcomes after Cardiac Surgery.**  
42  
43 *Journal of the American Society of Nephrology : JASN* 2017, **28**(11):3373-3382.  
44  
45
- 46 41. Daniels LB, Maisel AS: **Natriuretic peptides.** *Journal of the American College of Cardiology* 2007,  
47  
48 **50**(25):2357-2368.  
49  
50
- 51 42. Gambardella I, Gaudino M, Ronco C, Lau C, Ivascu N, Girardi LN: **Congestive kidney failure in**  
52  
53 **cardiac surgery: the relationship between central venous pressure and acute kidney injury.**  
54  
55  
56  
57  
58  
59  
60

- 1  
2  
3  
4 *Interactive cardiovascular and thoracic surgery* 2016, **23**(5):800-805.
- 5  
6  
7 43. Redant S, Honoré PM, De Bels D: **Fifty Shades of Central Venous Pressure in the Cardiorenal**  
8  
9 **Syndrome.** *Journal of translational internal medicine* 2020, **8**(1):1-2.
- 10  
11  
12 44. Li X, Liu C, Mao Z, Qi S, Song R, Zhou F: **Brain Natriuretic Peptide for Predicting Contrast-**  
13  
14 **Induced Acute Kidney Injury in Patients with Acute Coronary Syndrome Undergoing Coronary**  
15  
16 **Angiography: A Systematic Review and Meta-Analysis.** *Journal of interventional cardiology*  
17  
18 2020, **2020**:1035089.
- 19  
20  
21  
22 45. Lin KY, Wu ZY, You ZB, Zheng WP, Lin CJ, Jiang H, Ruan JM, Guo YS, Zhu PL: **Pre-Procedural**  
23  
24 **N-Terminal Pro-B Type Natriuretic Peptide Predicts Contrast-Induced Acute Kidney Injury and**  
25  
26 **Long-Term Outcome in Elderly Patients After Elective Percutaneous Coronary Intervention.**  
27  
28 *International heart journal* 2018, **59**(5):926-934.
- 29  
30  
31  
32 46. Greenberg JH, Parsons M, Zappitelli M, Jia Y, Thiessen-Philbrook HR, Devarajan P, Everett  
33  
34 AD, Parikh CR: **Cardiac Biomarkers for Risk Stratification of Acute Kidney Injury After Pediatric**  
35  
36 **Cardiac Surgery.** *The Annals of thoracic surgery* 2021, **111**(1):191-198.
- 37  
38  
39  
40 47. Patel UD, Garg AX, Krumholz HM, Shlipak MG, Coca SG, Sint K, Thiessen-Philbrook H, Koyner  
41  
42 JL, Swaminathan M, Passik CS *et al.* **Preoperative serum brain natriuretic peptide and risk of**  
43  
44 **acute kidney injury after cardiac surgery.** *Circulation* 2012, **125**(11):1347-1355.
- 45  
46  
47  
48 48. Zhao BC, Zhuang PP, Lei SH, Qiu SD, Yang X, Li C, Liu WF, Liu KX: **Pre-operative N-terminal**  
49  
50 **pro-B-type natriuretic peptide for prediction of acute kidney injury after noncardiac surgery: A**  
51  
52 **retrospective cohort study.** *European journal of anaesthesiology* 2021, **38**(6):591-599.
- 53  
54  
55  
56 49. Basu RK, Wong HR, Krawczeski CD, Wheeler DS, Manning PB, Chawla LS, Devarajan P,  
57  
58 Goldstein SL: **Combining functional and tubular damage biomarkers improves diagnostic**  
59  
60

- 1  
2  
3  
4 precision for acute kidney injury after cardiac surgery. *Journal of the American College of*  
5  
6 *Cardiology* 2014, **64**(25):2753-2762.  
7  
8  
9 50. Yang CH, Chang CH, Chen TH, Fan PC, Chang SW, Chen CC, Chu PH, Chen YT, Yang HY,  
10  
11 Yang CW *et al.* **Combination of Urinary Biomarkers Improves Early Detection of Acute Kidney**  
12  
13 **Injury in Patients With Heart Failure.** *Circulation journal : official journal of the Japanese*  
14  
15 *Circulation Society* 2016, **80**(4):1017-1023.  
16  
17  
18 51. Deng Y, Wang L, Hou Y, Ma J, Chi R, Ye H, Zhai Y, Zhang D, Gao L, Hu L *et al.* **The influence**  
19  
20 **of glycemic status on the performance of cystatin C for acute kidney injury detection in the**  
21  
22 **critically ill.** *Renal failure* 2019, **41**(1):139-149.  
23  
24  
25 52. Liang S, Shi M, Bai Y, Deng Y, Fang M, Li J, Wu Y, Peng W, Hou Y, Fang H *et al.* **The effect of**  
26  
27 **glucocorticoids on serum cystatin C in identifying acute kidney injury: a propensity-matched**  
28  
29 **cohort study.** *BMC nephrology* 2020, **21**(1):519.  
30  
31  
32 53. Zhang D, Gao L, Ye H, Chi R, Wang L, Hu L, Ouyang X, Hou Y, Deng Y, Long Y *et al.* **Impact**  
33  
34 **of thyroid function on cystatin C in detecting acute kidney injury: a prospective, observational**  
35  
36 **study.** *BMC nephrology* 2019, **20**(1):41.  
37  
38  
39  
40  
41  
42  
43  
44  
45  
46  
47  
48  
49  
50  
51  
52  
53  
54  
55  
56  
57  
58  
59  
60

### Figure legends

**Figure 1.** Flowchart for patient selection. ICU, intensive care unit; AKI, acute kidney injury; ESRD, end-stage renal disease; RRT, renal replacement therapy.

**Figure 2.** ROC analysis of the two biomarkers for AKI detection. Among 1222 patients, 256 were diagnosed as AKI. ROC, receiver operating characteristic; AKI, acute kidney injury; AUC, area under the receiver operating characteristic curve; CI, confidence interval; NT-proBNP, N-terminal pro-B-type natriuretic peptide; sCysC, serum cystatin C.

**Figure 3.** ROC analysis when two biomarkers were added to the clinical model for AKI detection. Among 1222 patients, 256 were diagnosed as AKI. ROC, receiver operating characteristic; AKI, acute kidney injury; AUC, area under the receiver operating characteristic curve; CI, confidence interval; sCysC, serum cystatin C; NT-proBNP, N-terminal pro-B-type natriuretic peptide.

1  
2  
3  
4  
5  
6  
7  
8  
9  
10  
11  
12  
13  
14  
15  
16  
17  
18  
19  
20  
21  
22  
23  
24  
25  
26  
27  
28  
29  
30  
31  
32  
33  
34  
35  
36  
37  
38  
39  
40  
41  
42  
43  
44  
45  
46  
47  
48  
49  
50  
51  
52  
53  
54  
55  
56  
57  
58  
59  
60

For peer review only

1  
2  
3  
4  
5  
6  
7  
8  
9  
10  
11  
12  
13  
14  
15  
16  
17  
18  
19  
20  
21  
22  
23  
24  
25  
26  
27  
28  
29  
30  
31  
32  
33  
34  
35  
36  
37  
38  
39  
40  
41  
42  
43  
44  
45  
46  
47  
48  
49  
50  
51  
52  
53  
54  
55  
56  
57  
58  
59  
60

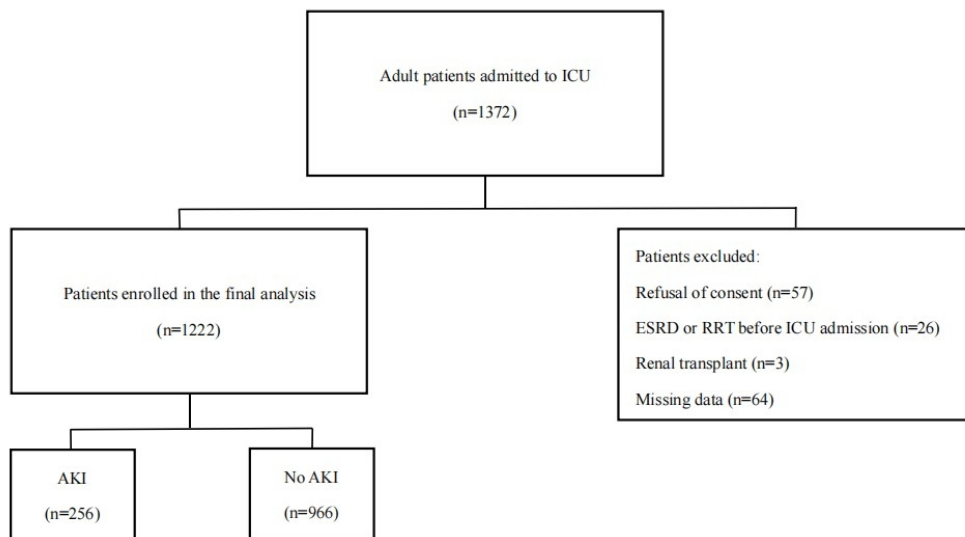

Flowchart for patient selection. ICU, intensive care unit; AKI, acute kidney injury; ESRD, end-stage renal disease; RRT, renal replacement therapy.

170x103mm (144 x 144 DPI)



ROC analysis of the two biomarkers for AKI detection. Among 1222 patients, 256 were diagnosed as AKI. ROC, receiver operating characteristic; AKI, acute kidney injury; AUC, area under the receiver operating characteristic curve; CI, confidence interval; NT-proBNP, N-terminal pro-B-type natriuretic peptide; sCysC, serum cystatin C.

165x132mm (96 x 96 DPI)





ROC analysis when two biomarkers were added to the clinical model for AKI detection. Among 1222 patients, 256 were diagnosed as AKI. ROC, receiver operating characteristic; AKI, acute kidney injury; AUC, area under the receiver operating characteristic curve; CI, confidence interval; sCysC, serum cystatin C; NT-proBNP, N-terminal pro-B-type natriuretic peptide.

165x132mm (96 x 96 DPI)

## TRIPOD Checklist: Prediction Model Development

| Section/Topic                | Item | Checklist Item                                                                                                                                                                                        | Page         |
|------------------------------|------|-------------------------------------------------------------------------------------------------------------------------------------------------------------------------------------------------------|--------------|
| <b>Title and abstract</b>    |      |                                                                                                                                                                                                       |              |
| Title                        | 1    | Identify the study as developing and/or validating a multivariable prediction model, the target population, and the outcome to be predicted.                                                          | 1            |
| Abstract                     | 2    | Provide a summary of objectives, study design, setting, participants, sample size, predictors, outcome, statistical analysis, results, and conclusions.                                               | 4-5          |
| <b>Introduction</b>          |      |                                                                                                                                                                                                       |              |
| Background and objectives    | 3a   | Explain the medical context (including whether diagnostic or prognostic) and rationale for developing or validating the multivariable prediction model, including references to existing models.      | 7-8          |
|                              | 3b   | Specify the objectives, including whether the study describes the development or validation of the model or both.                                                                                     | 8            |
| <b>Methods</b>               |      |                                                                                                                                                                                                       |              |
| Source of data               | 4a   | Describe the study design or source of data (e.g., randomized trial, cohort, or registry data), separately for the development and validation data sets, if applicable.                               | 9-10         |
|                              | 4b   | Specify the key study dates, including start of accrual; end of accrual; and, if applicable, end of follow-up.                                                                                        | 9-10         |
| Participants                 | 5a   | Specify key elements of the study setting (e.g., primary care, secondary care, general population) including number and location of centres.                                                          | 9            |
|                              | 5b   | Describe eligibility criteria for participants.                                                                                                                                                       | 9            |
|                              | 5c   | Give details of treatments received, if relevant.                                                                                                                                                     | NA           |
| Outcome                      | 6a   | Clearly define the outcome that is predicted by the prediction model, including how and when assessed.                                                                                                | 10           |
|                              | 6b   | Report any actions to blind assessment of the outcome to be predicted.                                                                                                                                | NA           |
| Predictors                   | 7a   | Clearly define all predictors used in developing or validating the multivariable prediction model, including how and when they were measured.                                                         | 9-10         |
|                              | 7b   | Report any actions to blind assessment of predictors for the outcome and other predictors.                                                                                                            | NA           |
| Sample size                  | 8    | Explain how the study size was arrived at.                                                                                                                                                            | 9            |
| Missing data                 | 9    | Describe how missing data were handled (e.g., complete-case analysis, single imputation, multiple imputation) with details of any imputation method.                                                  | 9            |
| Statistical analysis methods | 10a  | Describe how predictors were handled in the analyses.                                                                                                                                                 | 9            |
|                              | 10b  | Specify type of model, all model-building procedures (including any predictor selection), and method for internal validation.                                                                         | 11-12        |
|                              | 10d  | Specify all measures used to assess model performance and, if relevant, to compare multiple models.                                                                                                   | 12           |
| Risk groups                  | 11   | Provide details on how risk groups were created, if done.                                                                                                                                             | 11-12        |
| <b>Results</b>               |      |                                                                                                                                                                                                       |              |
| Participants                 | 13a  | Describe the flow of participants through the study, including the number of participants with and without the outcome and, if applicable, a summary of the follow-up time. A diagram may be helpful. | 13, figure 1 |
|                              | 13b  | Describe the characteristics of the participants (basic demographics, clinical features, available predictors), including the number of participants with missing data for predictors and outcome.    | 13           |
| Model development            | 14a  | Specify the number of participants and outcome events in each analysis.                                                                                                                               | 14-15        |
|                              | 14b  | If done, report the unadjusted association between each candidate predictor and outcome.                                                                                                              | 14           |
| Model specification          | 15a  | Present the full prediction model to allow predictions for individuals (i.e., all regression coefficients, and model intercept or baseline survival at a given time point).                           | 13-15        |
|                              | 15b  | Explain how to use the prediction model.                                                                                                                                                              | 14           |
| Model performance            | 16   | Report performance measures (with CIs) for the prediction model.                                                                                                                                      | 14-15        |
| <b>Discussion</b>            |      |                                                                                                                                                                                                       |              |
| Limitations                  | 18   | Discuss any limitations of the study (such as nonrepresentative sample, few events per predictor, missing data).                                                                                      | 23-24        |
| Interpretation               | 19b  | Give an overall interpretation of the results, considering objectives, limitations, and results from similar studies, and other relevant evidence.                                                    | 21-23        |
| Implications                 | 20   | Discuss the potential clinical use of the model and implications for future research.                                                                                                                 | 21-24        |
| <b>Other information</b>     |      |                                                                                                                                                                                                       |              |
| Supplementary information    | 21   | Provide information about the availability of supplementary resources, such as study protocol, Web calculator, and data sets.                                                                         | 25-32        |
| Funding                      | 22   | Give the source of funding and the role of the funders for the present study.                                                                                                                         | 27           |

We recommend using the TRIPOD Checklist in conjunction with the TRIPOD Explanation and Elaboration document.

# BMJ Open

## Serum N-terminal pro-B-type natriuretic peptide and cystatin C for acute kidney injury detection in critically ill adults: A prospective, observational study

|                                 |                                                                                                                                                                                                                                                                                                                                                                                                                                                                                                                                                                                                                                                                                                                                                                                                                                                                                                                                                                                                                                                                                                                                                                                                                                                                                                                                                                                      |
|---------------------------------|--------------------------------------------------------------------------------------------------------------------------------------------------------------------------------------------------------------------------------------------------------------------------------------------------------------------------------------------------------------------------------------------------------------------------------------------------------------------------------------------------------------------------------------------------------------------------------------------------------------------------------------------------------------------------------------------------------------------------------------------------------------------------------------------------------------------------------------------------------------------------------------------------------------------------------------------------------------------------------------------------------------------------------------------------------------------------------------------------------------------------------------------------------------------------------------------------------------------------------------------------------------------------------------------------------------------------------------------------------------------------------------|
| Journal:                        | <i>BMJ Open</i>                                                                                                                                                                                                                                                                                                                                                                                                                                                                                                                                                                                                                                                                                                                                                                                                                                                                                                                                                                                                                                                                                                                                                                                                                                                                                                                                                                      |
| Manuscript ID                   | bmjopen-2022-063896.R2                                                                                                                                                                                                                                                                                                                                                                                                                                                                                                                                                                                                                                                                                                                                                                                                                                                                                                                                                                                                                                                                                                                                                                                                                                                                                                                                                               |
| Article Type:                   | Original research                                                                                                                                                                                                                                                                                                                                                                                                                                                                                                                                                                                                                                                                                                                                                                                                                                                                                                                                                                                                                                                                                                                                                                                                                                                                                                                                                                    |
| Date Submitted by the Author:   | 07-Dec-2022                                                                                                                                                                                                                                                                                                                                                                                                                                                                                                                                                                                                                                                                                                                                                                                                                                                                                                                                                                                                                                                                                                                                                                                                                                                                                                                                                                          |
| Complete List of Authors:       | Deng, Jia; Southern Medical University, The Second School of Clinical Medicine; The Second Hospital of Dalian Medical University, Critical Care Medicine<br>He, Linling; Guangdong Academy of Medical Sciences, Department of Intensive Care Unit of Cardiovascular Surgery; Guangdong Academy of Medical Sciences, Department of Critical Care Medicine<br>Liang, Yufan; Maoming People's Hospital, Department of Emergency; Guangdong Medical University<br>Hu, Linhui; Maoming People's Hospital, Department of Critical Care Medicine<br>Xu, Jing; Guangdong Academy of Medical Sciences, Department of Intensive Care Unit of Cardiovascular Surgery; Guangdong Academy of Medical Sciences, Department of Critical Care Medicine<br>Fang, Heng; Guangdong Academy of Medical Sciences, Department of Critical Care Medicine; Guangdong Academy of Medical Sciences, Department of Intensive Care Unit of Cardiovascular Surgery<br>Li, Ying; Guangdong Academy of Medical Sciences, Department of Critical Care Medicine; Guangdong Academy of Medical Sciences, Department of Intensive Care Unit of Cardiovascular Surgery<br>Chen, Chunbo; Southern Medical University, The Second School of Clinical Medicine; Guangdong Cardiovascular Institute, Guangdong General Hospital, Guangdong Academy of Medical Sciences, Department of Intensive Care Unit of Cardiac Surgery |
| <b>Primary Subject Heading</b>: | Intensive care                                                                                                                                                                                                                                                                                                                                                                                                                                                                                                                                                                                                                                                                                                                                                                                                                                                                                                                                                                                                                                                                                                                                                                                                                                                                                                                                                                       |
| Secondary Subject Heading:      | Renal medicine                                                                                                                                                                                                                                                                                                                                                                                                                                                                                                                                                                                                                                                                                                                                                                                                                                                                                                                                                                                                                                                                                                                                                                                                                                                                                                                                                                       |
| Keywords:                       | Acute renal failure < NEPHROLOGY, Adult intensive & critical care < INTENSIVE & CRITICAL CARE, Nephrology < INTERNAL MEDICINE                                                                                                                                                                                                                                                                                                                                                                                                                                                                                                                                                                                                                                                                                                                                                                                                                                                                                                                                                                                                                                                                                                                                                                                                                                                        |
|                                 |                                                                                                                                                                                                                                                                                                                                                                                                                                                                                                                                                                                                                                                                                                                                                                                                                                                                                                                                                                                                                                                                                                                                                                                                                                                                                                                                                                                      |

SCHOLARONE™  
Manuscripts



I, the Submitting Author has the right to grant and does grant on behalf of all authors of the Work (as defined in the below author licence), an exclusive licence and/or a non-exclusive licence for contributions from authors who are: i) UK Crown employees; ii) where BMJ has agreed a CC-BY licence shall apply, and/or iii) in accordance with the terms applicable for US Federal Government officers or employees acting as part of their official duties; on a worldwide, perpetual, irrevocable, royalty-free basis to BMJ Publishing Group Ltd ("BMJ") its licensees and where the relevant Journal is co-owned by BMJ to the co-owners of the Journal, to publish the Work in this journal and any other BMJ products and to exploit all rights, as set out in our [licence](#).

The Submitting Author accepts and understands that any supply made under these terms is made by BMJ to the Submitting Author unless you are acting as an employee on behalf of your employer or a postgraduate student of an affiliated institution which is paying any applicable article publishing charge ("APC") for Open Access articles. Where the Submitting Author wishes to make the Work available on an Open Access basis (and intends to pay the relevant APC), the terms of reuse of such Open Access shall be governed by a Creative Commons licence – details of these licences and which [Creative Commons](#) licence will apply to this Work are set out in our licence referred to above.

Other than as permitted in any relevant BMJ Author's Self Archiving Policies, I confirm this Work has not been accepted for publication elsewhere, is not being considered for publication elsewhere and does not duplicate material already published. I confirm all authors consent to publication of this Work and authorise the granting of this licence.

**Title****Serum N-terminal pro-B-type natriuretic peptide and cystatin C for acute kidney injury detection in critically ill adults: A prospective, observational study**

Jia Deng<sup>1,2,3†</sup>, Linling He<sup>2,4,5†</sup>, Yufan Liang<sup>6,7†</sup>, Linhui Hu<sup>8†</sup>, Jing Xu<sup>2,4</sup>, Heng Fang<sup>2,4</sup>, Ying Li<sup>2,4</sup>, Chunbo Chen<sup>1,2,4,9\*</sup>

1. The Second School of Clinical Medicine, Southern Medical University, Guangzhou 510515, Guangdong, China

2. Department of Critical Care Medicine, Guangdong Provincial People's Hospital, Guangdong Academy of Medical Sciences, 106 Zhongshan Er Road, Guangzhou 510080, Guangdong, China.

3. Department of Critical Care Medicine, The Second Hospital of Dalian Medical University, Dalian 116023, Liaoning, China

4. Department of Intensive Care Unit of Cardiovascular Surgery, Guangdong Cardiovascular Institute, Guangdong Provincial People's Hospital, Guangdong Academy of Medical Sciences, Laboratory of South China Structural Heart Disease, 96 Dongchuan Road, Guangzhou 510080, Guangdong, China.

5. Shantou University Medical College, Shantou 515063, Guangdong, China.

6. Department of Emergency, Maoming People's Hospital, 101 Weimin Road, Maoming 525000, Guangdong, China.

7. Guangdong Medical University, Zhanjiang 524023, Guangdong, China

8. Department of Critical Care Medicine, Maoming People's Hospital, 101 Weimin Road, Maoming 525000, Guangdong, China.

9. National Clinical Research Center for Kidney Disease, State Key Laboratory of Organ Failure Research, Nanfang Hospital, Southern Medical University, Guangzhou 510515, Guangdong, China.

1  
2  
3  
4  
5  
6 \* Corresponding author:  
7

8  
9 Chunbo Chen

10  
11 Department of Intensive Care Unit of Cardiovascular Surgery, Guangdong  
12  
13 Cardiovascular Institute, Guangdong Provincial People's Hospital, Guangdong  
14  
15 Academy of Medical Sciences, 96 Dongchuan Road, Guangzhou 510080, Guangdong  
16  
17 Province, People's Republic of China.  
18  
19

20  
21  
22 Email: [gghccm@163.com](mailto:gghccm@163.com)  
23  
24  
25

26  
27 † Jia Deng, Linling He, Yufan Liang and Linhui Hu these authors contributed equally  
28  
29 to this study, Co-first author.  
30  
31

32  
33 1 The Second School of Clinical Medicine, Southern Medical University, Guangzhou  
34  
35 510515, Guangdong, China  
36  
37  
38  
39

40 Email addresses for all authors:

41  
42  
43 Jia Deng: [dengjia19881001@126.com](mailto:dengjia19881001@126.com)  
44

45  
46 Linling He: [906928457@qq.com](mailto:906928457@qq.com)  
47

48  
49 Yufan Liang: [yufan1524@163.com](mailto:yufan1524@163.com)  
50

51  
52 Linhui Hu: [hulinhui@live.cn](mailto:hulinhui@live.cn)

53  
54 Jing Xu: [xjxiaodaifu@163.com](mailto:xjxiaodaifu@163.com)

55  
56 Heng Fang: [1330928862@qq.com](mailto:1330928862@qq.com)  
57

58  
59 Ying Li: [572257002@qq.com](mailto:572257002@qq.com)  
60

Chunbo Chen: gghccm@163.com

For peer review only

1  
2  
3  
4  
5  
6  
7  
8  
9  
10  
11  
12  
13  
14  
15  
16  
17  
18  
19  
20  
21  
22  
23  
24  
25  
26  
27  
28  
29  
30  
31  
32  
33  
34  
35  
36  
37  
38  
39  
40  
41  
42  
43  
44  
45  
46  
47  
48  
49  
50  
51  
52  
53  
54  
55  
56  
57  
58  
59  
60

## Abstract

**Objective** Serum N-terminal pro-B-type natriuretic peptide (NT-proBNP) and cystatin C (sCysC) are available clinically and beneficial in diagnosing AKI. Our purpose is to identify the performance of their combined diagnosis for AKI in critically ill patients.

**Design** A prospectively-recruited, observational study was performed.

**Setting** Adults admitted to the intensive care unit of a tertiary hospital in China.

**Participants** A total of 1222 critically ill patients were enrolled in the study.

**Main outcome measures** To identify the performance of the combined diagnosis of serum NT-proBNP and sCysC for AKI in critically ill patients. The area under the receiver operating characteristic curve (AUC-ROC), category-free net reclassification index (NRI), and incremental discrimination improvement (IDI) were utilized for comparing the discriminative powers of a combined and single biomarker adjusted model of clinical variables enriched with NTproBNP and Cystatin C for AKI.

## Results

AKI was detected in 256 out of 1222 included patients (20.9%). AUC-ROC for NT-proBNP and sCysC to detect AKI had a significantly higher accuracy than any individual biomarker ( $P < 0.05$ ). After multivariate adjustment, a level of serum NT-proBNP  $\geq 204$  pg/mL was associated with 3.5-fold higher odds for AKI compared with those below the cutoff value. Similar results were obtained for sCysC levels ( $P < 0.001$ ). To detect AKI, adding NT-proBNP and sCysC to a clinical model further increased the AUC-ROC to 0.859 beyond that of the clinical model with or without sCysC ( $P < 0.05$ ). Moreover, the addition of these two to the clinical model significantly improved risk



1  
2  
3  
4 reclassification of AKI beyond that of the clinical model alone or with single biomarker  
5  
6 ( $P < 0.05$ ), as measured by NRI and IDI.  
7  
8

### 9 **Conclusions**

10  
11 In critically ill individuals, serum NT-proBNP, sCysC, and clinical risk factors  
12  
13 combination improve the discriminative power for diagnosing AKI.  
14  
15  
16

### 17 **Keywords**

18  
19 Acute kidney injury, N-terminal pro-B-type natriuretic peptide, Serum cystatin C,  
20  
21  
22 Intensive care unit  
23  
24  
25  
26  
27  
28  
29  
30  
31  
32  
33  
34  
35  
36  
37  
38  
39  
40  
41  
42  
43  
44  
45  
46  
47  
48  
49  
50  
51  
52  
53  
54  
55  
56  
57  
58  
59  
60

### Strengths and limitations of this study

This study is the first to evaluate the performance of serum NT-proBNP combined with sCysC in detecting AKI.

This prospective, observational study has a long duration and an adequate sample size.

We evaluated the combined efficacy of serum NT-proBNP and sCysC in the diagnosis of AKI by calculating area under the curve and category-free net reclassification index and incremental discrimination improvement.

The limitation of this study is that dynamic assessment of NT-proBNP and sCysC changes was not available as only measured their levels at admission. □

## Introduction

Acute kidney injury (AKI) is a predominant clinical syndrome affecting more than 50% of patients who underwent treatment at intensive care unit (ICU)<sup>[1-3]</sup>. Increased morbidity, mortality, hospitalization length, and cost are extremely related to AKI<sup>[4-6]</sup>, so early recognition of AKI is critical to guiding management. Urine production and serum creatinine were employed as diagnostic criteria for AKI in accordance with the recommendations of Kidney Disease Improving Global Outcomes (KDIGO) guidelines<sup>[7]</sup>. Changes in sCr or urine production cannot recognize early renal tubular injury prior to a reduction in glomerular filtration rate<sup>[8,9]</sup>. Therefore, early and reliable AKI biomarkers are necessary to promote timely intervention and minimize complications. However, it is impossible for an individual biomarker to adequately evaluate the risk of AKI as a complex multifactorial syndrome<sup>[3,10]</sup>. Combining diverse biomarkers in a clinical model evaluation could enhance early detection of AKI in critically ill patients<sup>[5,11,12]</sup>.

A hemodynamic marker stress, N-terminal pro-B-type natriuretic peptide (NT-proBNP), has recently received attention as a potential predictor of AKI in a wide diversity of clinical settings<sup>[13-17]</sup>. High serum NT-proBNP level reflects hemodynamic instability, myocardial wall stress, myocardial ischemia, volume overload, sympathetic nervous system and renin-angiotensin-aldosterone system activation, all of which may contribute to AKI incidence<sup>[18-20]</sup>. However, there are finite data on clinical use of NT-proBNP for detecting AKI among critically ill patients.

Serum Cystatin C (sCysC), a 122-amino acid low-molecular-weight protein (13 kDa),

1  
2  
3  
4 is a marker of glomerular filtration<sup>[9]</sup>. CysC has a half-life of about one-third that of  
5  
6 sCr, causing CysC to reach homeostasis three times faster. These properties promote  
7  
8 sCysC as an alternative marker of renal function<sup>[8]</sup>. To date, sCysC has been displayed  
9  
10 to be conducive for the early identification of all-cause AKI<sup>[21]</sup>.  
11  
12

13  
14 Although serum NT-proBNP and sCysC are mainly used for the prognosis  
15  
16 assessment of heart disease and the prediction of acute cardiac events with AKI <sup>[22-26]</sup>,  
17  
18 the diagnostic accuracy of their combination for AKI in ICU remains unknown. We  
19  
20 performed a prospective study in the present research to evaluate the performance of  
21  
22 serum NT-proBNP and sCysC at ICU admission, both independently and in  
23  
24 combination, for AKI determination among critically ill adults.  
25  
26  
27  
28  
29  
30  
31  
32  
33  
34  
35  
36  
37  
38  
39  
40  
41  
42  
43  
44  
45  
46  
47  
48  
49  
50  
51  
52  
53  
54  
55  
56  
57  
58  
59  
60

## Methods

### Study design and participants

At Guangdong Provincial People's Hospital in China, a tertiary care hospital, a prospectively recruited observational research was performed in a mixed medical-surgical ICU. From December 2016 to December 2017, we consecutively enrolled patients aged 18 and up in a row. Pregnancy, renal replacement therapy (RRT) prior to ICU admittance, nephrectomy, end-stage renal disease (ESRD), renal transplant, rejection of consent, or missing admission information were all exclusion criteria. The study protocol strengthened the reporting requirements of observational studies in epidemiology<sup>[27]</sup> and standards for the reporting of diagnostic accuracy<sup>[28]</sup>. This study protocol was authorized by ethics committee of Guangdong Provincial People's Hospital. Additionally, all procedures were carried out consistent with applicable regulations and guidelines. All patients provided written informed consent.

### Data collection

Clinical baseline data were collected prospectively. Within 1 h following ICU admission, blood samples were collected contemporaneously to determine sCr, serum NT-proBNP, and sCysC. Within 24 h after collection, all samples were analyzed in the Guangdong Provincial People's Hospital central laboratory utilizing standard protocol. When a patient is admitted to the ICU, sCr was measured and subsequently done at least once a day until discharge as part of routine clinical care. Throughout admission to ICU, urine production was also been recorded. We evaluated the following clinical variables: age, gender, body mass index (BMI), preexisting clinical conditions, sepsis,

1  
2  
3  
4 admission type, baseline sCr, baseline estimated glomerular filtration rate (eGFR),  
5  
6 Acute Physiology and Chronic Health Evaluation (APACHE) II score, ICU mortality,  
7  
8 in-hospital mortality, duration of ICU admittance, length of hospitalization, ICU costs,  
9  
10 and total costs. The outcome was the incidence of AKI following ICU enrollment  
11  
12 within 1 week. To calculate eGFR, we employed the Chronic Kidney Disease  
13  
14 Epidemiology Collaboration (CKD-EPI) creatinine equation [29].  
15  
16  
17  
18

### 19 **Definitions**

20  
21  
22 The KDIGO classification criteria were utilized to define AKI: as a rise in sCr  
23  
24 by  $\geq 0.3$  mg/dL (26.5  $\mu\text{mol/L}$ ) within 48 h or a rise in sCr to  $\geq 1.5$  times the  
25  
26 baseline within 1 week, or urine output  $< 0.5$  mL/kg/h for 6 h after ICU  
27  
28 admission<sup>[7]</sup>.  
29  
30  
31

32  
33 Relying on following principles, ranked in descending order of preference, a  
34  
35 baseline sCr was affirmed<sup>[30]</sup>: (1) prior to ICU admittance, the most recent pre-  
36  
37 ICU value between 30 and 365 days; (2) a stable pre-ICU value  $> 365$  days prior  
38  
39 to ICU admittance for patients  $< 40$  years of age (stable definition is being within  
40  
41 15% of the lowest ICU measurement); (3) pre-ICU value  $> 365$  days prior to  
42  
43 ICU admittance and lower than the initial sCr at ICU admission; (4) a pre-ICU  
44  
45 value (within 3 and 39 days prior to ICU admittance) lower than or equal to the  
46  
47 initial sCr upon ICU admittance not obviously during AKI; (5) the least sCr  
48  
49 value obtained at initial ICU admittance, the most recent ICU value, or the  
50  
51 lowest value achieved to a 365-day follow up.  
52  
53  
54  
55  
56  
57

### 58 **Biomarker measurement**

1  
2  
3  
4 The levels of sCysC and sCr were quantified through the UniCel DxC 800 Synchron  
5  
6 system usage in compliance with the manufacturer's instructions (Beckman Coulter,  
7  
8 Brea, CA, USA). For sCysC, the intra- and inter-assay variation coefficients were 10%  
9  
10 and 5%, respectively. Levels of serum NT-proBNP were quantified through an  
11  
12 electrochemiluminescence immunoassay employing a Cobas® e602 system usage  
13  
14 (Roche Diagnostics, Germany). For NT-proBNP, the uppermost limit of normal for  
15  
16 those who seem to be healthy (95th percentage) has been 125 pg/mL. The coefficient  
17  
18 of interassay variation for NT-proBNP was < 5%. Each patient's clinical features were  
19  
20 blinded to the personnel measuring the biomarkers.  
21  
22  
23  
24  
25

### 26 27 **Patient and public involvement**

28  
29 Patients and/or the public were not involved in the design, or conduct, or reporting, or  
30  
31 dissemination plans of this research.  
32  
33  
34

### 35 36 **Statistical analysis**

37  
38 For statistical analyses, we utilized SPSS version 21.0 (SPSS, Chicago, IL, USA),  
39  
40 MedCalc version 18.2.1 (MedCalc Software, Ostend, Belgium) and R version 4.1.1 (R  
41  
42 Foundation for Statistical Computing, Vienna, Austria). The mean  $\pm$  standard deviation  
43  
44 or median (25th to 75th percentage, interquartile range) had been utilized to express  
45  
46 continuous variables. Numbers (percent) were utilized to represent categorical variables.  
47  
48 For nonnormally distributed continuous variables, the Wilcoxon rank-sum test was  
49  
50 employed for intergroup difference measurement, and for categorical variables, the chi-  
51  
52 square or Fisher's exact test was deployed.  
53  
54  
55  
56

57  
58 NT-proBNP concentrations were extremely skewed and therefore were log<sub>10</sub>  
59  
60

1  
2  
3  
4 transformed before inclusion in the models. Areas under the receiver operating  
5  
6 characteristic curves (AUC-ROCs) were computed. The method exploited by DeLong  
7  
8 et al. was used to compare AUC-ROCs between groups<sup>[31]</sup>. The biomarkers' sensitivity,  
9  
10 specificity, positive and negative predictive values, positive and negative likelihood  
11  
12 ratios of the biomarkers were calculated. Youden's index for AKI detection identified  
13  
14 the optimal cutoff values for individual biomarkers and their combination<sup>[32]</sup>.  
15  
16  
17  
18

19  
20 Logistic analysis was utilized to compute the odds ratios (ORs) and 95% confidence  
21  
22 intervals for each factor: to identify the independent risk factors of AKI, with a forward  
23  
24 stepwise method, in which the clinical variables with  $P < 0.10$  in univariate analysis  
25  
26 were incorporated into the multivariate logistic model. We categorized NT-proBNP and  
27  
28 sCysC levels according to their cutoff values and then performed logistic regression on  
29  
30 the created variables. We conducted multiple logistic regression analyses to calculate  
31  
32 the adjusted ORs of AKI, which was based on the clinical risk factors for AKI.  
33  
34  
35  
36

37  
38 The performance of AKI detection after adding NT-proBNP and sCysC, or any of  
39  
40 them, into the clinical model as categorical variables was assessed by AUC-ROC,  
41  
42 category-free net reclassification improvement (NRI) index and integrated  
43  
44 discrimination improvement (IDI) index, as described previously<sup>[33, 34]</sup>. To better  
45  
46 quantify how accurately the reference and reclassification model would perform with  
47  
48 independent data, we adopted a 10-fold cross-validation<sup>[35]</sup>. All the tests were 2-tailed,  
49  
50 and  $P < 0.05$  was regarded statistically significant.  
51  
52  
53  
54  
55  
56  
57  
58  
59  
60



## Results

### Clinical data and outcomes

A total of 150 (10.9 %) of the 1372 adult patients enrolled in the study were excluded (Figure 1). Therefore, 1222 patients were enrolled and AKI occurred in 256 patients (20.9%). Patient baseline variables and outcomes are exhibited in Table 1. In comparison to patients without AKI, patients with AKI were elderly and were observed more frequently in those with comorbidities, including chronic kidney disease (CKD), hypertension, coronary artery disease (CAD), diabetes mellitus (DM), heart failure (HF), cerebrovascular disease and chronic obstructive pulmonary disease (COPD). Increased sCr, serum NT-proBNP and sCysC levels at admission, as well as increased APACHE II scores, were more prevalent in AKI patients. The baseline sCr and eGFR did not show significant differences between the two groups.

Indeed, AKI patients had a higher risk of adverse outcomes, a higher percentage of ICU and in-hospital mortality, higher expenses, a longer hospitalization duration, and a longer stay in ICU ( $P < 0.001$ ) compared to those without AKI.

### Detective abilities of the two biomarkers for AKI

To demonstrate the ability of these biomarkers for AKI detection, we used AUC-ROCs to calculate the two biomarkers, respectively, and in combination. AUC-ROCs for NT-proBNP and sCysC were computed for AKI detection (0.821 and 0.766, respectively). For AKI detection, NT-proBNP had a sensitivity of 78% and a specificity of 75%, while sCysC had high specificity but limited sensitivity. The cutoff values for NT-proBNP and sCysC were 204 pg/mL and 1.02 mg/L, respectively, yielding good sensitivity and specificity. We included NT-proBNP and sCysC in a multivariate logistic regression model to derived their combined AUC for comparison with the single biomarker's. The AUC-ROCs for AKI presented a better

1  
2  
3  
4 performance by NT-proBNP and sCysC (0.832) than any individual biomarker ( $P < 0.05$ , Table  
5  
6 2 and Figure 2).

### 9 **Multivariate logistic regression analyses of the two biomarkers for AKI detection**

10  
11 We stratified patients based on the two cutoff values of serum NT-proBNP and sCysC levels  
12  
13 into two categories, respectively. Compared to those with serum NT-proBNP  $< 204$  pg/mL,  
14  
15 patients with serum NT-proBNP  $\geq 204$  pg/mL on admission exhibited a higher incidence of  
16  
17 AKI (7.2% versus 45.1%,  $P < 0.001$ ). AKI was found to have higher incidence (46.5%) in  
18  
19 patients with sCysC  $\geq 1.02$  mg/L compared to those with sCysC  $< 1.02$  mg/L (10.2%) ( $P <$   
20  
21 0.001). Following clinical variables adjustment (including CKD, HF, sepsis, admission type,  
22  
23 sCr at admission, and APACHE II scores, Table 3), a level of serum NT-proBNP  $\geq 204$  pg/mL  
24  
25 was associated with 3.5-fold higher odds for AKI compared with NT-proBNP level below the  
26  
27 cutoff value ( $P < 0.001$ ). Similarly, patients with sCysC  $\geq 1.02$  mg/L were linked to 2.6-fold  
28  
29 greater odds for AKI compared to those with sCysC  $< 1.02$  mg/L ( $P < 0.001$ ) (Table 4).

### 37 **Discrimination and reclassification of the combination of biomarkers and clinical models** 38 39 **for AKI**

40  
41  
42 Considering the effect of adding NT-proBNP and sCysC, or any of them, to a clinical model as  
43  
44 categorical variables for AKI detection, logistic regression analysis was employed. On ICU  
45  
46 admittance for AKI diagnosis, potential available variables including age, sepsis, admission  
47  
48 type, sCr, and APACHE II scores as well as comorbidities, including hypertension, DM, CKD,  
49  
50 cerebrovascular disease, COPD, CAD, and HF were considered. The clinical model for  
51  
52 detecting AKI involved CKD, HF, sepsis, admission type, sCr at admission, and APACHE II  
53  
54 scores (Table 3). The cross-validated baseline performance characterized by accuracy and  
55  
56  
57  
58  
59  
60

1  
2  
3  
4 Kappa for the clinical model was 0.844 and 0.448.  
5

6 To evaluate the enhancement of discriminative capacity, a panel of NT-proBNP and sCysC  
7  
8 was introduced to the above-mentioned model. As shown in Table 5, compared with the clinical  
9  
10 model, the addition of NT-proBNP to the clinical model had a higher AUC-ROC ( $P < 0.05$ ),  
11  
12 and no statistically significant variation existed when sCyC was added to the clinical model.  
13  
14 However, the risk reclassification was markedly improved through the addition of NT-proBNP  
15  
16 or sCyC to the clinical model, as measured by category-free NRI and IDI ( $P < 0.05$ ). Adding  
17  
18 NT-proBNP and sCysC to a clinical model for AKI detection further increased the AUC-ROC  
19  
20 to 0.859 beyond that of the clinical model with or without sCysC ( $P < 0.05$ ) (Figure 3). The  
21  
22 cross-validated baseline performance characterized by accuracy and Kappa for the clinical  
23  
24 model enriched with NTproBNP and Cystatin C was 0.848 and 0.475. Moreover, this panel  
25  
26 addition to the clinical model significantly enhanced the risk reclassification of AKI beyond  
27  
28 that of the clinical model with or without any individual biomarkers ( $P < 0.05$ ), with maximum  
29  
30 NRI (0.531) and IDI (0.038).  
31  
32  
33  
34  
35  
36  
37  
38  
39  
40  
41  
42  
43  
44  
45  
46  
47  
48  
49  
50  
51  
52  
53  
54  
55  
56  
57  
58  
59  
60

**Table 1** Clinical data and outcomes

| Characteristics                              | Total (n=1222)            | AKI (n=256)                 | No AKI (n=966)            | P value |
|----------------------------------------------|---------------------------|-----------------------------|---------------------------|---------|
| Age, years                                   | 57 (45-67)                | 63.5 (52-72)                | 55 (44-65)                | <0.001  |
| Male, n (%)                                  | 666 (54.5)                | 151 (59.0)                  | 515 (53.3)                | 0.105   |
| BMI, kg/m <sup>2</sup>                       | 22 (19.6-24.7)            | 22.3 (19.9-25.0)            | 21.9 (19.6-24.6)          | 0.395   |
| <b>Preexisting clinical conditions</b>       |                           |                             |                           |         |
| Hypertension, n (%)                          | 252 (20.6)                | 81 (31.6)                   | 171 (17.7)                | <0.001  |
| Diabetes mellitus, n (%)                     | 121 (9.9)                 | 52 (20.3)                   | 69 (7.1)                  | <0.001  |
| Chronic kidney disease, n (%)                | 26 (2.1)                  | 21 (8.2)                    | 5 (0.5)                   | <0.001  |
| Cerebrovascular disease, n (%)               | 127 (10.4)                | 50 (19.5)                   | 77 (8.0)                  | <0.001  |
| Chronic obstructive pulmonary disease, n (%) | 35 (2.9)                  | 18 (7.0)                    | 17 (1.8)                  | <0.001  |
| Coronary artery disease, n (%)               | 53 (4.3)                  | 24 (9.4)                    | 29 (3.0)                  | <0.001  |
| Heart failure, n (%)                         | 31 (2.5)                  | 22 (8.6)                    | 9 (0.9)                   | <0.001  |
| Cancer, n (%)                                | 227 (18.6)                | 50 (19.5)                   | 177 (18.3)                | 0.659   |
| Sepsis, n (%)                                | 98 (8.0)                  | 70 (27.3)                   | 28 (2.9)                  | <0.001  |
| <b>Admission type, n (%)</b>                 |                           |                             |                           |         |
| Elective surgical, n (%)                     | 863 (70.6)                | 84 (32.8)                   | 779 (80.6)                | <0.001  |
| Emergency surgical, n (%)                    | 83 (6.8)                  | 33 (12.9)                   | 50 (5.2)                  | <0.001  |
| Medical, n (%)                               | 276 (22.6)                | 139 (54.3)                  | 137 (14.2)                | <0.001  |
| Baseline serum creatinine, mg/dL             | 0.78 (0.64-0.96)          | 0.76 (0.58-1.09)            | 0.79 (0.65-0.94)          | 0.949   |
| Baseline eGFR, mL/min/1.73 m <sup>2</sup>    | 119.4 (97.6-145.4)        | 122.9 (83.3-158.7)          | 118.7 (100.4-142.9)       | 0.950   |
| <b>Parameters at ICU admission</b>           |                           |                             |                           |         |
| Cr, mg/dl                                    | 0.87 (0.72-1.07)          | 0.97 (0.72-1.55)            | 0.85 (0.72-1.02)          | <0.001  |
| NT-proBNP, pg/mL                             | 97.1 (29.4-464.4)         | 871.0 (225.8-2919.3)        | 66.2 (23.7-206.2)         | <0.001  |
| sCysC, mg/L                                  | 0.78 (0.61-1.06)          | 1.15 (0.83-1.85)            | 0.75 (0.58-0.94)          | <0.001  |
| APACHE II score                              | 7 (4-10)                  | 11 (8-16)                   | 6 (4-9)                   | <0.001  |
| UP, ml/kg/h                                  | 1.67 (1.20-2.26)          | 1.37 (0.89-2.20)            | 1.73 (1.26-2.27)          | <0.001  |
| <b>Outcomes</b>                              |                           |                             |                           |         |
| ICU mortality, n (%)                         | 40 (3.3)                  | 33 (12.9)                   | 7 (0.7)                   | <0.001  |
| In-hospital mortality, n (%)                 | 53 (4.3)                  | 40 (15.6)                   | 13 (1.3)                  | <0.001  |
| ICU stay, days                               | 2 (2-4)                   | 6 (3-13.3)                  | 2 (2-3)                   | <0.001  |
| Hospital stay, days                          | 16 (12-23)                | 22 (13-33.3)                | 15 (11-21)                | <0.001  |
| ICU costs, CNY                               | 39461.7 (28966.2-59437.2) | 66140.1 (36526.0-131843.8)  | 37667.5 (27881.5-48238.4) | <0.001  |
| Total costs, CNY                             | 58295.3 (44201.6-98602.8) | 128945.6 (71506.8-199685.4) | 52773.8 (40856.2-78718.9) | <0.001  |

Abbreviations: AKI, acute kidney injury; BMI, body mass index; eGFR, estimated glomerular filtration rate; ICU, intensive care unit; sCr, serum creatinine, NT-proBNP, N-terminal pro-B-type natriuretic peptide; sCysC, serum cystatin C; APACHE II score, acute physiology and chronic health evaluation II score; UP, Urine production first 24 h after admission; CNY, Chinese yuan.

Continuous variables are expressed as mean  $\pm$  standard deviation or median (25th to 75th percentile, interquartile range). Categorical variables are expressed as a n (%).

**Table 2** Detective characteristics of the two biomarkers for AKI

| Logistic regression models | AUC-ROC <sup>a</sup> (95%CI)     | Cutoff <sup>b</sup> | Sensitivity | Specificity | (+) LR | (-) LR | PPV  | NPV  |
|----------------------------|----------------------------------|---------------------|-------------|-------------|--------|--------|------|------|
| sCysC                      | 0.766 (0.741-0.789)              | 1.02 mg/L           | 0.66        | 0.80        | 3.28   | 0.43   | 0.47 | 0.90 |
| NT-proBNP                  | 0.821 (0.799-0.842) <sup>c</sup> | 204.00 pg/mL        | 0.78        | 0.75        | 3.12   | 0.29   | 0.45 | 0.93 |
| NT-proBNP+ sCysC           | 0.832 (0.809-0.852) <sup>d</sup> | 0.15 <sup>e</sup>   | 0.84        | 0.69        | 2.69   | 0.23   | 0.42 | 0.94 |

Abbreviations: AKI, acute kidney injury; AUC-ROC, area under the receiver operating characteristic curve; CI, confidence interval; (+) LR, Positive likelihood ratio; (-) LR, negative likelihood ratio; PPV, Positive predictive value; NPV, Negative predictive value; sCysC, Serum cystatin C; NT-proBNP, N-terminal pro-B-type natriuretic peptide.

<sup>a</sup> Values are presented as AUC-ROC (95% CI)

<sup>b</sup> Ideal cutoff value according to Youden's index

<sup>c</sup>  $P < 0.05$  vs. sCysC ( $P=0.0011$ )

<sup>d</sup>  $P < 0.05$  vs. NT-proBNP ( $P=0.0145$ ), sCysC ( $P<0.0001$ )

<sup>e</sup> Cutoff points of the biomarker panels were the predicted probabilities generated from the multiple logistic regression model

**Table 3** Logistic analyses of clinical risk factors for AKI detection

| Variables                             | Univariate analysis   |                | Multivariate model   |                |
|---------------------------------------|-----------------------|----------------|----------------------|----------------|
|                                       | OR (95% CI)           | <i>P</i> value | OR (95% CI)          | <i>P</i> value |
| Age                                   | 1.029 (1.019-1.038)   | <0.001         |                      |                |
| Hypertension                          | 2.152 (1.577-2.937)   | <0.001         |                      |                |
| Diabetes mellitus                     | 3.314 (2.242-4.898)   | <0.001         |                      |                |
| Chronic kidney disease                | 17.175 (6.410-46.023) | <0.001         | 4.182 (1.250-13.998) | 0.020          |
| Cerebrovascular disease               | 2.802 (1.903-4.126)   | <0.001         |                      |                |
| Chronic obstructive pulmonary disease | 4.222 (2.143-8.316)   | <0.001         |                      |                |
| Coronary artery disease               | 3.342 (1.910-5.849)   | <0.001         |                      |                |
| Heart failure                         | 9.997 (4.544-21.997)  | <0.001         | 3.487 (1.365-8.911)  | 0.009          |
| Sepsis                                | 12.608 (7.914-20.084) | <0.001         | 5.033 (2.914-8.692)  | <0.001         |
| Admission type                        |                       | <0.001         |                      | <0.001         |
| Elective surgical                     | 1.0 (Referent)        |                | 1.0 (Referent)       |                |
| Emergency surgical                    | 6.121 (3.735-10.030)  | <0.001         | 3.493 (2.023-6.032)  | <0.001         |
| Medical                               | 9.409 (6.791-13.037)  | <0.001         | 3.237 (2.157-4.858)  | <0.001         |
| sCr                                   | 3.135 (2.385-4.120)   | <0.001         | 1.538 (1.149-2.058)  | 0.004          |
| APACHE II score                       | 1.215 (1.182-1.249)   | <0.001         | 1.101 (1.066-1.137)  | <0.001         |

Abbreviations: AKI, acute kidney injury; OR, odds ratio; CI, confidence interval; sCr, serum creatinine; APACHE II score, acute physiology and chronic health evaluation II score.

**Table 4** Multivariate logistic regression analyses of the two biomarkers for AKI detection

| Variables                                    | AKI, % | Unadjusted OR (95% CI) | P value | Adjusted OR <sup>a</sup> (95% CI) | P value |
|----------------------------------------------|--------|------------------------|---------|-----------------------------------|---------|
| NT-proBNP (pg/mL, n)                         |        |                        |         |                                   |         |
| <204, 779                                    | 7.2    | 1.0 (Referent)         |         | 1.0 (Referent)                    |         |
| ≥204, 443                                    | 45.1   | 10.626 (7.639-14.781)  | <0.001  | 3.460 (2.307-5.189)               | <0.001  |
| sCysC layered by the cut-off value (mg/L, n) |        |                        |         |                                   |         |
| <1.02, 861                                   | 10.2   | 1.0 (Referent)         |         | 1.0 (Referent)                    |         |
| ≥1.02, 361                                   | 46.5   | 7.646 (5.651-10.345)   | <0.001  | 2.649 (1.842-3.810)               | <0.001  |

Abbreviations: AKI, acute kidney injury; OR, odds ratio; CI, confidence interval, NT-proBNP, N-terminal pro-B-type natriuretic peptide; sCysC, Serum cystatin C.

<sup>a</sup> Adjusted for chronic kidney disease, heart failure, sepsis, admission type, serum creatinine at admission and acute physiology and chronic health evaluation II score.

**Table 5** Discrimination and reclassification of the combination of biomarkers and clinical model for AKI

|                                                                     | AUC-ROC (95%CI)     | <i>P</i> value <sup>a</sup> | Category-Free NRI (95%CI) | <i>P</i> value <sup>a</sup> | IDI (95%CI)         | <i>P</i> value <sup>a</sup> |
|---------------------------------------------------------------------|---------------------|-----------------------------|---------------------------|-----------------------------|---------------------|-----------------------------|
| Clinical model <sup>b</sup>                                         | 0.840 (0.812-0.868) |                             |                           |                             |                     |                             |
| Clinical model + sCysC                                              | 0.847 (0.819-0.874) | 0.163                       | 0.193 (0.052-0.405)       | 0.036                       | 0.017 (0.009-0.026) | <0.001                      |
| Clinical model + NT-proBNP                                          | 0.855 (0.828-0.882) | 0.013                       | 0.462 (0.196-0.747)       | 0.001                       | 0.028 (0.016-0.039) | <0.001                      |
| Clinical model + NT-proBNP + sCysC                                  | 0.859 (0.832-0.885) | 0.006                       | 0.531 (0.238-0.741)       | <0.001                      | 0.038 (0.025-0.051) | <0.001                      |
| Clinical model + NT-proBNP + sCysC vs<br>Clinical model + sCysC     | -                   | 0.015                       | 0.328 (0.139-0.553)       | 0.002                       | 0.021 (0.010-0.031) | <0.001                      |
| Clinical model + NT-proBNP + sCysC vs<br>Clinical model + NT-proBNP | -                   | 0.223                       | 0.167 (0.013-0.285)       | 0.017                       | 0.011 (0.004-0.018) | 0.003                       |

Abbreviations: AUC-ROC, area under the receiver operating characteristic curve; NRI, net reclassification index; IDI, incremental discrimination improvement; AKI, acute kidney injury; CI, confidence interval; sCysC, serum cystatin C; NT-proBNP, N-terminal pro-B-type natriuretic peptide.

a Biomarker + clinical model versus clinical model.

b The clinical model for detecting AKI is composed of chronic kidney disease, heart failure, sepsis, Admission type, serum creatinine at admission and acute physiology and chronic health evaluation II score.

Hosmer–Lemeshow goodness-of-fit test: for clinical model, chi-squared value=14.249(P=0.075); for clinical model + sCysC, chi-squared value=6.971 (P=0.54); for clinical model + NT-proBNP, chi-squared value=9.362 (P=0.313); or clinical model + NT-proBNP +sCysC, chi-squared value=4.245 (P=0.834).



## Discussion

The study's key finding was that the combination of NT-proBNP and sCysC yields greater discriminative ability for AKI detection at ICU admission with or without a clinical model in critically ill adults. The finding indicates that assessing both serum NT-proBNP and sCysC levels on admission may assist with the early diagnosis and risk stratification of AKI in critically ill adults.

One of the most prevalent complications occurring in a variety of clinical settings is AKI, especially for critically ill patients<sup>[4, 6, 36, 37]</sup>. The development of AKI, as the same as its severity, is strongly associated with increased mortality<sup>[3, 36]</sup>. However, early identification is challenging when sCr or urine production changes are used to detect AKI<sup>[38]</sup>, and precise clinical predictors are not widely known. Numerous studies have found and confirmed the accuracy and additional clinical benefits of these renal biomarkers for early AKI diagnosis, such as insulin-like growth factor-binding protein, matrix metalloproteinase-7, tissue inhibitor metalloproteinase-2, angiotensinogen, sCysC, neutrophil gelatinase-associated lipocalin and so on<sup>[5, 9, 12, 39, 40]</sup>. However, some novel biomarkers are not being used in clinical practice, due to insufficient evidence or previously unavailable commercially. Thus, the rational application of clinically available biomarkers is more practical and economical.

NT-proBNP, a widely used marker of hemodynamic stress, is a polypeptide secreted by the ventricles and its role is to facilitate natriuresis<sup>[17, 41]</sup>. In patients with elevated CVP, the raised pressure may be transmitted to the renal veins, resulting in renal congestion and reduced glomerular filtration<sup>[14, 42, 43]</sup>. It makes sense that NT-proBNP is associated with the development of AKI. The clinical application of serum NT-proBNP in cardiac disease has been

1  
2  
3  
4 extensively confirmed and finds its predictive value for AKI development in patients with HF,  
5  
6 coronary angiography, or percutaneous coronary intervention [19, 23, 44, 45]. Several studies have  
7  
8 elucidated the link between NT-proBNP and AKI incidence after cardiac or noncardiac  
9  
10 surgery<sup>[13, 46-48]</sup>. However, its utility for AKI detection has not been fully evaluated in general  
11  
12 ICU, and it is necessary to verify the reliability and universality of NT-proBNP in  
13  
14 heterogeneous populations. The data demonstrated herein not only maintain NT-proBNP as a  
15  
16 risk factor for AKI but also indicate that it can enhance the risk reclassification and  
17  
18 discrimination for AKI in ICU.  
19  
20  
21  
22  
23

24  
25 A single biomarker is insufficient to express the multiple pathophysiological mechanisms of  
26  
27 AKI, especially for critically ill patients, as AKI is a heterogeneous syndrome<sup>[9, 10]</sup>. There is no  
28  
29 consensus on which specific markers should be combined to detect AKI. Numerous studies  
30  
31 have revealed that combining different biomarkers utilized to detect AKI can improve  
32  
33 predictive abilities<sup>[5, 49, 50]</sup>. Naruse et al. showed that combining urinary liver-type fatty-acid  
34  
35 binding protein and serum NT-proBNP can enhance early prediction of AKI in patients in  
36  
37 medical cardiac ICUs<sup>[15]</sup>. Similar to such studies, we identified that the combination of two  
38  
39 markers, serum NT-proBNP and sCysC, improved the diagnostic performance of AKI.  
40  
41  
42  
43  
44

45  
46 CysC is a glomerular filtration biomarker that can be utilized to anticipate the development  
47  
48 of AKI and undesirable outcomes<sup>[8, 9]</sup>. The application and performance of CysC for AKI  
49  
50 prediction have been demonstrated in various clinical settings<sup>[5, 11, 51-53]</sup>. In individuals with ST-  
51  
52 segment elevation myocardial infarction, a combination of B-type natriuretic peptide and CysC  
53  
54 may contribute to risk stratification for AKI<sup>[25]</sup>. In the present cohort, sCysC had a slightly  
55  
56 higher specificity than NT-proBNP in the detection of AKI, but its sensitivity is limited. The  
57  
58  
59  
60

1  
2  
3  
4 ability of sCysC for detecting AKI was fine, but its AUC-ROC was not as great as NT-proBNP.  
5  
6 Moreover, the combination of serum NT-proBNP and sCysC at ICU admission had the highest  
7  
8 AUC-ROC. These data indicate that the simultaneous measurement of serum NT-proBNP and  
9  
10 sCysC at ICU admission could improve the early identification of AKI.  
11  
12

13  
14 Biomarkers for AKI, which indicates the various underlying pathophysiological mechanisms  
15  
16 involved in AKI incidence, might be superior to individual biomarkers alone<sup>[3, 6]</sup>. It is also  
17  
18 important that these biomarkers profit from being easily measurable, readily accessible,  
19  
20 comparatively cheap, and with an elevated level of sensitivity and specificity. In the present  
21  
22 study, for AKI detection NT-proBNP acted as a hemodynamic stress biomarker with high  
23  
24 sensitivity and specificity, and sCysC had high specificity as a functional biomarker. Even after  
25  
26 clinical risk variables adjustment, elevated NT-proBNP is an independent risk factor for AKI.  
27  
28 The NT-proBNP addition to the clinical model significantly enhanced risk reclassification, as  
29  
30 demonstrated by category-free NRI and IDI. Moreover, our results identified that the addition  
31  
32 of NT-proBNP to sCysC markedly improved their detective abilities as biomarkers. Adding  
33  
34 biomarkers to the clinical model further improved the diagnostic accuracy of AKI, as measured  
35  
36 by AUC-ROCs. These data suggest that a single biomarker is insufficient for early diagnosis of  
37  
38 AKI. Therefore, the method of combining different biomarkers may be of greater use.  
39  
40  
41  
42  
43  
44  
45  
46  
47

48 There are some limitations for this study. First, it was a single-center study, with an unproven  
49  
50 external validity. Second, there were only 26 patients with CKD patients and 31 HF patients  
51  
52 enrolled, and hence we were unable to stratify our group relying on eGFR or cardiac function  
53  
54 at baseline. Accordingly, future studies should be administrated in these subgroups. Last, we  
55  
56 did not accomplish routine echocardiography in all patients to associate NT-proBNP levels with  
57  
58  
59  
60

1  
2  
3  
4 ventricular dilatation or other pathways that may promote NT-proBNP release. Despite these  
5  
6 limitations, we believe that our findings have clinical implications and should facilitate further  
7  
8 research to confirm our results.  
9

## 10 **Conclusion**

11  
12 In the present cohort, simultaneous measurement of NT-proBNP and sCysC at ICU admission  
13  
14 increases the early identification of AKI beyond that of biomarker in isolation, and that the  
15  
16 combination of the two biomarkers and clinical risk factors improves the discriminative ability  
17  
18 for AKI detection in critically ill adults.  
19  
20  
21  
22  
23  
24  
25  
26  
27  
28  
29  
30  
31  
32  
33  
34  
35  
36  
37  
38  
39  
40  
41  
42  
43  
44  
45  
46  
47  
48  
49  
50  
51  
52  
53  
54  
55  
56  
57  
58  
59  
60

## Abbreviations

(-) LR, negative likelihood ratios

(+) LR, positive likelihood ratios

AKI, Acute kidney injury

APACHE II score, Acute Physiology and Chronic Health Evaluation II score

AUC-ROC, area under the receiver operating characteristic curve

BMI, body mass index

CAD, coronary artery disease

CI, confidence interval

CNY, Chinese yuan

CKD, chronic kidney disease

CKD-EPI, Chronic Kidney Disease Epidemiology Collaboration

COPD, chronic obstructive pulmonary disease

DM, diabetes mellitus

eGFR, estimated glomerular filtration rate

ESRD, end-stage renal disease

HF, heart failure

ICU, intensive care unit

IDI, incremental discrimination improvement

KDIGO, Kidney Disease Improving Global Outcomes

NPV, negative predictive values

NRI net reclassification index

1  
2  
3  
4 NT-proBNP, N-terminal pro-B-type natriuretic peptide  
5

6 ORs, odds ratios  
7

8  
9 PPV, positive predictive values  
10

11 RRT, renal replacement therapy  
12

13  
14 sCr, serum creatinine  
15

16  
17 sCysC, serum cystatin C  
18

19 UP, Urine production first 24 h after admission  
20  
21  
22  
23

## 24 **Acknowledgements**

25  
26  
27 The authors thank all the doctors, nurses, technicians, and patients at the Guangdong Provincial  
28  
29 People's Hospital for their dedication in the study.  
30  
31  
32  
33  
34

## 35 **Authors' contributions**

36  
37 JD, LLH, YFL and LHH equally contributed to the design of the research, analysis and  
38  
39 interpretation of the data. CBC and JD contributed to the conception and design of the research  
40  
41 as well as interpretation of the data, and critically revised the manuscript. JD, LLH, YFL, LHH,  
42  
43 JX, HF and YL performed the research and collected data. All authors contributed to the  
44  
45 acquisition and analysis of the data, drafted the manuscript, and agree to be fully accountable  
46  
47 for ensuring the integrity and accuracy of the work. All authors read and approved the final  
48  
49 manuscript.  
50  
51  
52  
53  
54  
55  
56  
57  
58  
59  
60

## **Funding**

The study was supported by Chunbo Chen's research grants from the National Natural Science Foundation of China [82172162], the Major Program of Summit Project, Guangdong Province High-level Hospital Construction Project of Guangdong Provincial People's Hospital, Guangdong Academy of Medical Sciences [DFJH2020028] and the Office of Talent Work Leading Group in Maoming (number of MaoRenCaiBan [2020]24).

## **Availability of data and materials**

The datasets generated and/or analyzed during this study are not publicly available, owing to currently ongoing research studies, but the data are available from the corresponding author on reasonable request.

## **Ethics approval and consent to participate**

The ethics committee of the Guangdong Provincial People's Hospital approved the study design, protocol, ethical issue, and data and sample collection (No. GDREC2015396H(R1)). Written informed consent was obtained from each patient or from the appropriate surrogates.

## **Patient consent for publication**

Not required.

## **Consent for publication**

Not applicable. No individual personal data are included in the study. All patients provided necessary consent to participate in the present study.

## **Competing interests**

1  
2  
3  
4 The authors declare that they have no competing interests.  
5  
6  
7  
8

9  
10 **Uncategorized References**  
11

- 12  
13 1. Hoste EA, Bagshaw SM, Bellomo R, Cely CM, Colman R, Cruz DN, Edipidis K, Forni LG,  
14  
15 Gomersall CD, Govil D *et al*: **Epidemiology of acute kidney injury in critically ill patients: the**  
16  
17 **multinational AKI-EPI study**. *Intensive care medicine* 2015, **41**(8):1411-1423.  
18  
19  
20 2. Srisawat N, Kulvichit W, Mahamitra N, Hurst C, Praditpornsilpa K, Lumlertgul N, Chuasuwan A,  
21  
22 Trongtrakul K, Tasnarong A, Champunot R *et al*: **The epidemiology and characteristics of acute**  
23  
24 **kidney injury in the Southeast Asia intensive care unit: a prospective multicentre study**.  
25  
26 *Nephrology, dialysis, transplantation : official publication of the European Dialysis and*  
27  
28 *Transplant Association - European Renal Association* 2020, **35**(10):1729-1738.  
29  
30  
31 3. Ronco C, Bellomo R, Kellum JA: **Acute kidney injury**. *Lancet (London, England)* 2019,  
32  
33 **394**(10212):1949-1964.  
34  
35  
36 4. Levey AS, James MT: **Acute Kidney Injury**. *Annals of internal medicine* 2017, **167**(9):itc66-itc80.  
37  
38  
39 5. Deng Y, Chi R, Chen S, Ye H, Yuan J, Wang L, Zhai Y, Gao L, Zhang D, Hu L *et al*: **Evaluation**  
40  
41 **of clinically available renal biomarkers in critically ill adults: a prospective multicenter**  
42  
43 **observational study**. *Critical care (London, England)* 2017, **21**(1):46.  
44  
45  
46 6. Liu KD, Goldstein SL, Vijayan A, Parikh CR, Kashani K, Okusa MD, Agarwal A, Cerdá J:  
47  
48 **AKI!Now Initiative: Recommendations for Awareness, Recognition, and Management of AKI**.  
49  
50 *Clinical journal of the American Society of Nephrology : CJASN* 2020, **15**(12):1838-1847.  
51  
52  
53 7. **Kidney Disease: Improving Global Outcomes (KDIGO) Acute Kidney Injury Work Group. KDIGO**  
54  
55 **Clinical Practice Guideline for Acute Kidney Injury**. 2012.  
56  
57  
58  
59  
60



- 1  
2  
3  
4 8. Teo SH, Endre ZH: **Biomarkers in acute kidney injury (AKI)**. *Best practice & research Clinical*  
5  
6 *anaesthesiology* 2017, **31**(3):331-344.  
7  
8  
9 9. Albert C, Haase M, Albert A, Zapf A, Braun-Dullaeus RC, Haase-Fielitz A: **Biomarker-Guided**  
10  
11 **Risk Assessment for Acute Kidney Injury: Time for Clinical Implementation?** *Annals of laboratory*  
12  
13 *medicine* 2021, **41**(1):1-15.  
14  
15  
16 10. McCullough PA, Shaw AD, Haase M, Bouchard J, Waikar SS, Siew ED, Murray PT, Mehta RL,  
17  
18 Ronco C: **Diagnosis of acute kidney injury using functional and injury biomarkers: workgroup**  
19  
20 **statements from the tenth Acute Dialysis Quality Initiative Consensus Conference.** *Contributions*  
21  
22 *to nephrology* 2013, **182**:13-29.  
23  
24  
25 11. Deng Y, Ma J, Hou Y, Zhou D, Hou T, Li J, Liang S, Tan N, Chen C: **Combining Serum Cystatin**  
26  
27 **C and Urinary N-Acetyl-Beta-D-Glucosaminidase Improves the Precision for Acute Kidney**  
28  
29 **Injury Diagnosis after Resection of Intracranial Space-Occupying Lesions.** *Kidney & blood*  
30  
31 *pressure research* 2020, **45**(1):142-156.  
32  
33  
34 12. Yang X, Chen C, Tian J, Zha Y, Xiong Y, Sun Z, Chen P, Li J, Yang T, Ma C *et al*: **Urinary**  
35  
36 **Angiotensinogen Level Predicts AKI in Acute Decompensated Heart Failure: A Prospective,**  
37  
38 **Two-Stage Study.** *Journal of the American Society of Nephrology : JASN* 2015, **26**(8):2032-  
39  
40 2041.  
41  
42  
43 13. Cardinale D, Cosentino N, Moltrasio M, Sandri MT, Petrella F, Colombo A, Bacchiani G,  
44  
45 Tessitore A, Bonomi A, Veglia F *et al*: **Acute kidney injury after lung cancer surgery: Incidence**  
46  
47 **and clinical relevance, predictors, and role of N-terminal pro B-type natriuretic peptide.** *Lung*  
48  
49 *cancer (Amsterdam, Netherlands)* 2018, **123**:155-159.  
50  
51  
52  
53 14. Haines R, Crichton S, Wilson J, Treacher D, Ostermann M: **Cardiac biomarkers are associated**  
54  
55  
56  
57  
58  
59  
60

- 1  
2  
3  
4 with maximum stage of acute kidney injury in critically ill patients: a prospective analysis. *Critical*  
5  
6 *care (London, England)* 2017, **21**(1):88.  
7  
8
- 9 15. Naruse H, Ishii J, Takahashi H, Kitagawa F, Nishimura H, Kawai H, Muramatsu T, Harada M,  
10  
11 Yamada A, Motoyama S *et al.* Predicting acute kidney injury using urinary liver-type fatty-acid  
12  
13 binding protein and serum N-terminal pro-B-type natriuretic peptide levels in patients treated at  
14  
15 medical cardiac intensive care units. *Critical care (London, England)* 2018, **22**(1):197.  
16  
17
- 18 16. Schaub JA, Coca SG, Moledina DG, Gentry M, Testani JM, Parikh CR: Amino-Terminal Pro-B-  
19  
20 Type Natriuretic Peptide for Diagnosis and Prognosis in Patients With Renal Dysfunction: A  
21  
22 Systematic Review and Meta-Analysis. *JACC Heart failure* 2015, **3**(12):977-989.  
23  
24  
25
- 26 17. Wiese S, Breyer T, Dragu A, Wakili R, Burkard T, Schmidt-Schweda S, Füchtbauer EM,  
27  
28 Dohrmann U, Beyersdorf F, Radicke D *et al.* Gene expression of brain natriuretic peptide in  
29  
30 isolated atrial and ventricular human myocardium: influence of angiotensin II and diastolic fiber  
31  
32 length. *Circulation* 2000, **102**(25):3074-3079.  
33  
34  
35
- 36 18. Damman K, Testani JM: The kidney in heart failure: an update. *European heart journal* 2015,  
37  
38 **36**(23):1437-1444.  
39  
40  
41
- 42 19. Goussot S, Mousson C, Guenancia C, Stamboul K, Brunel P, Brunet D, Touzery C, Cottin Y,  
43  
44 Zeller M: N-Terminal Fragment of Pro B-type Natriuretic Peptide as a Marker of Contrast-  
45  
46 Induced Nephropathy After Primary Percutaneous Coronary Intervention for ST-Segment  
47  
48 Elevation Myocardial Infarction. *The American journal of cardiology* 2015, **116**(6):865-871.  
49  
50  
51
- 52 20. Yamashita T, Seino Y, Ogawa A, Ogata K, Fukushima M, Tanaka K, Mizuno K: N-terminal pro-  
53  
54 BNP is a novel biomarker for integrated cardio-renal burden and early risk stratification in  
55  
56 patients admitted for cardiac emergency. *Journal of cardiology* 2010, **55**(3):377-383.  
57  
58  
59  
60

- 1  
2  
3  
4 21. Herget-Rosenthal S, Marggraf G, Hüsing J, Göring F, Pietruck F, Janssen O, Philipp T, Kribben  
5  
6 A: **Early detection of acute renal failure by serum cystatin C.** *Kidney international* 2004,  
7  
8 **66(3):1115-1122.**  
9  
10  
11 22. Carrasco-Sánchez FJ, Pérez-Calvo JI, Morales-Rull JL, Galisteo-Almeda L, Páez-Rubio I,  
12  
13 Barón-Franco B, Aguayo-Canela M, Pujol-De la llave E: **Heart failure mortality according to**  
14  
15 **acute variations in N-terminal pro B-type natriuretic peptide and cystatin C levels.** *Journal of*  
16  
17 *cardiovascular medicine (Hagerstown, Md)* 2014, **15(2):115-121.**  
18  
19  
20 23. Linzbach S, Samigullin A, Yilmaz S, Tsioga M, Zeiher AM, Spyridopoulos I: **Role of N-terminal**  
21  
22 **pro-brain natriuretic peptide and cystatin C to estimate renal function in patients with and without**  
23  
24 **heart failure.** *The American journal of cardiology* 2009, **103(8):1128-1133.**  
25  
26  
27 24. Ruan ZB, Zhu L, Yin YG, Chen GC: **Cystatin C, N-terminal probrain natriuretic peptides and**  
28  
29 **outcomes in acute heart failure with acute kidney injury in a 12-month follow-up: Insights into**  
30  
31 **the cardiorenal syndrome.** *Journal of research in medical sciences : the official journal of Isfahan*  
32  
33 *University of Medical Sciences* 2014, **19(5):404-409.**  
34  
35  
36 25. Tung YC, Chang CH, Chen YC, Chu PH: **Combined biomarker analysis for risk of acute kidney**  
37  
38 **injury in patients with ST-segment elevation myocardial infarction.** *PloS one* 2015,  
39  
40 **10(4):e0125282.**  
41  
42  
43 26. Wang C, Han S, Tong F, Li Y, Li Z, Sun Z: **Predictive Value of the Serum Cystatin C/Prealbumin**  
44  
45 **Ratio in Combination With NT-proBNP Levels for Long-Term Prognosis in Chronic Heart Failure**  
46  
47 **Patients: A Retrospective Cohort Study.** *Frontiers in cardiovascular medicine* 2021, **8:684919.**  
48  
49  
50 27. von Elm E, Altman DG, Egger M, Pocock SJ, Gøtzsche PC, Vandenbroucke JP: **The**  
51  
52 **Strengthening the Reporting of Observational Studies in Epidemiology (STROBE) statement:**  
53  
54  
55  
56  
57  
58  
59  
60

- 1  
2  
3  
4 **guidelines for reporting observational studies.** *Annals of internal medicine* 2007, **147**(8):573-577.  
5  
6  
7 28. Bossuyt PM, Reitsma JB, Bruns DE, Gatsonis CA, Glasziou PP, Irwig LM, Lijmer JG, Moher D,  
8  
9 Rennie D, de Vet HC: **Toward complete and accurate reporting of studies of diagnostic accuracy:**  
10  
11 **the STARD initiative.** *Academic radiology* 2003, **10**(6):664-669.  
12  
13  
14 29. Levey AS, Stevens LA, Schmid CH, Zhang YL, Castro AF, 3rd, Feldman HI, Kusek JW, Eggers  
15  
16 P, Van Lente F, Greene T *et al.* **A new equation to estimate glomerular filtration rate.** *Annals of*  
17  
18 *internal medicine* 2009, **150**(9):604-612.  
19  
20  
21  
22 30. Endre ZH, Walker RJ, Pickering JW, Shaw GM, Frampton CM, Henderson SJ, Hutchison R,  
23  
24 Mehrtens JE, Robinson JM, Schollum JB *et al.* **Early intervention with erythropoietin does not**  
25  
26 **affect the outcome of acute kidney injury (the EARLYARF trial).** *Kidney international* 2010,  
27  
28 **77**(11):1020-1030.  
29  
30  
31  
32 31. DeLong ER, DeLong DM, Clarke-Pearson DL: **Comparing the areas under two or more**  
33  
34 **correlated receiver operating characteristic curves: a nonparametric approach.** *Biometrics* 1988,  
35  
36 **44**(3):837-845.  
37  
38  
39  
40 32. Youden WJ: **Index for rating diagnostic tests.** *Cancer* 1950, **3**(1):32-35.  
41  
42  
43 33. Cook NR: **Statistical evaluation of prognostic versus diagnostic models: beyond the ROC curve.**  
44  
45 *Clinical chemistry* 2008, **54**(1):17-23.  
46  
47  
48 34. Pencina MJ, D'Agostino RB, Sr., D'Agostino RB, Jr., Vasan RS: **Evaluating the added predictive**  
49  
50 **ability of a new marker: from area under the ROC curve to reclassification and beyond.** *Statistics*  
51  
52 *in medicine* 2008, **27**(2):157-172; discussion 207-112.  
53  
54  
55  
56 35. Albert C, Haase M, Albert A, Kropf S, Bellomo R, Westphal S, Westerman M, Braun-Dullaeus  
57  
58 RC, Haase-Fielitz A: **Urinary Biomarkers may Complement the Cleveland Score for Prediction**  
59  
60

- 1  
2  
3  
4 **of Adverse Kidney Events After Cardiac Surgery: A Pilot Study.** *Annals of laboratory medicine*  
5  
6 2020, **40**(2):131-141.  
7  
8
- 9 36. Xu X, Nie S, Liu Z, Chen C, Xu G, Zha Y, Qian J, Liu B, Han S, Xu A *et al.* **Epidemiology and**  
10  
11 **Clinical Correlates of AKI in Chinese Hospitalized Adults.** *Clinical journal of the American*  
12  
13 *Society of Nephrology : CJASN* 2015, **10**(9):1510-1518.  
14  
15
- 16 37. Xu X, Nie S, Zhang A, Mao J, Liu HP, Xia H, Xu H, Liu Z, Feng S, Zhou W *et al.* **Acute Kidney**  
17  
18 **Injury among Hospitalized Children in China.** *Clinical journal of the American Society of*  
19  
20 *Nephrology : CJASN* 2018, **13**(12):1791-1800.  
21  
22
- 23 38. Martins CB, De Bels D, Honore PM, Redant S: **Early Prediction of Acute Kidney Injury by**  
24  
25 **Machine Learning: Should We Add the Urine Output Criterion to Improve this New Tool?** *Journal*  
26  
27 *of translational internal medicine* 2020, **8**(4):201-202.  
28  
29
- 30 39. Chen C, Yang X, Lei Y, Zha Y, Liu H, Ma C, Tian J, Chen P, Yang T, Hou FF: **Urinary Biomarkers**  
31  
32 **at the Time of AKI Diagnosis as Predictors of Progression of AKI among Patients with Acute**  
33  
34 **Cardiorenal Syndrome.** *Clinical journal of the American Society of Nephrology : CJASN* 2016,  
35  
36 **11**(9):1536-1544.  
37  
38
- 39 40. Yang X, Chen C, Teng S, Fu X, Zha Y, Liu H, Wang L, Tian J, Zhang X, Liu Y *et al.* **Urinary**  
40  
41 **Matrix Metalloproteinase-7 Predicts Severe AKI and Poor Outcomes after Cardiac Surgery.**  
42  
43 *Journal of the American Society of Nephrology : JASN* 2017, **28**(11):3373-3382.  
44  
45
- 46 41. Daniels LB, Maisel AS: **Natriuretic peptides.** *Journal of the American College of Cardiology* 2007,  
47  
48 **50**(25):2357-2368.  
49  
50
- 51 42. Gambardella I, Gaudino M, Ronco C, Lau C, Ivascu N, Girardi LN: **Congestive kidney failure in**  
52  
53 **cardiac surgery: the relationship between central venous pressure and acute kidney injury.**  
54  
55  
56  
57  
58  
59  
60

- 1  
2  
3  
4 *Interactive cardiovascular and thoracic surgery* 2016, **23**(5):800-805.
- 5  
6  
7 43. Redant S, Honoré PM, De Bels D: **Fifty Shades of Central Venous Pressure in the Cardiorenal**  
8  
9 **Syndrome.** *Journal of translational internal medicine* 2020, **8**(1):1-2.
- 10  
11  
12 44. Li X, Liu C, Mao Z, Qi S, Song R, Zhou F: **Brain Natriuretic Peptide for Predicting Contrast-**  
13  
14 **Induced Acute Kidney Injury in Patients with Acute Coronary Syndrome Undergoing Coronary**  
15  
16 **Angiography: A Systematic Review and Meta-Analysis.** *Journal of interventional cardiology*  
17  
18 2020, **2020**:1035089.
- 19  
20  
21  
22 45. Lin KY, Wu ZY, You ZB, Zheng WP, Lin CJ, Jiang H, Ruan JM, Guo YS, Zhu PL: **Pre-Procedural**  
23  
24 **N-Terminal Pro-B Type Natriuretic Peptide Predicts Contrast-Induced Acute Kidney Injury and**  
25  
26 **Long-Term Outcome in Elderly Patients After Elective Percutaneous Coronary Intervention.**  
27  
28 *International heart journal* 2018, **59**(5):926-934.
- 29  
30  
31  
32 46. Greenberg JH, Parsons M, Zappitelli M, Jia Y, Thiessen-Philbrook HR, Devarajan P, Everett  
33  
34 AD, Parikh CR: **Cardiac Biomarkers for Risk Stratification of Acute Kidney Injury After Pediatric**  
35  
36 **Cardiac Surgery.** *The Annals of thoracic surgery* 2021, **111**(1):191-198.
- 37  
38  
39  
40 47. Patel UD, Garg AX, Krumholz HM, Shlipak MG, Coca SG, Sint K, Thiessen-Philbrook H, Koyner  
41  
42 JL, Swaminathan M, Passik CS *et al.* **Preoperative serum brain natriuretic peptide and risk of**  
43  
44 **acute kidney injury after cardiac surgery.** *Circulation* 2012, **125**(11):1347-1355.
- 45  
46  
47  
48 48. Zhao BC, Zhuang PP, Lei SH, Qiu SD, Yang X, Li C, Liu WF, Liu KX: **Pre-operative N-terminal**  
49  
50 **pro-B-type natriuretic peptide for prediction of acute kidney injury after noncardiac surgery: A**  
51  
52 **retrospective cohort study.** *European journal of anaesthesiology* 2021, **38**(6):591-599.
- 53  
54  
55  
56 49. Basu RK, Wong HR, Krawczeski CD, Wheeler DS, Manning PB, Chawla LS, Devarajan P,  
57  
58 Goldstein SL: **Combining functional and tubular damage biomarkers improves diagnostic**  
59  
60

- 1  
2  
3  
4 precision for acute kidney injury after cardiac surgery. *Journal of the American College of*  
5  
6 *Cardiology* 2014, **64**(25):2753-2762.  
7  
8  
9 50. Yang CH, Chang CH, Chen TH, Fan PC, Chang SW, Chen CC, Chu PH, Chen YT, Yang HY,  
10  
11 Yang CW *et al.* **Combination of Urinary Biomarkers Improves Early Detection of Acute Kidney**  
12  
13 **Injury in Patients With Heart Failure.** *Circulation journal : official journal of the Japanese*  
14  
15 *Circulation Society* 2016, **80**(4):1017-1023.  
16  
17  
18 51. Deng Y, Wang L, Hou Y, Ma J, Chi R, Ye H, Zhai Y, Zhang D, Gao L, Hu L *et al.* **The influence**  
19  
20 **of glycemic status on the performance of cystatin C for acute kidney injury detection in the**  
21  
22 **critically ill.** *Renal failure* 2019, **41**(1):139-149.  
23  
24  
25 52. Liang S, Shi M, Bai Y, Deng Y, Fang M, Li J, Wu Y, Peng W, Hou Y, Fang H *et al.* **The effect of**  
26  
27 **glucocorticoids on serum cystatin C in identifying acute kidney injury: a propensity-matched**  
28  
29 **cohort study.** *BMC nephrology* 2020, **21**(1):519.  
30  
31  
32 53. Zhang D, Gao L, Ye H, Chi R, Wang L, Hu L, Ouyang X, Hou Y, Deng Y, Long Y *et al.* **Impact**  
33  
34 **of thyroid function on cystatin C in detecting acute kidney injury: a prospective, observational**  
35  
36 **study.** *BMC nephrology* 2019, **20**(1):41.  
37  
38  
39  
40  
41  
42  
43  
44  
45  
46  
47  
48  
49  
50  
51  
52  
53  
54  
55  
56  
57  
58  
59  
60

### Figure legends

**Figure 1.** Flowchart for patient selection. ICU, intensive care unit; AKI, acute kidney injury; ESRD, end-stage renal disease; RRT, renal replacement therapy.

**Figure 2.** ROC analysis of the two biomarkers for AKI detection. Among 1222 patients, 256 were diagnosed as AKI. ROC, receiver operating characteristic; AKI, acute kidney injury; AUC, area under the receiver operating characteristic curve; CI, confidence interval; NT-proBNP, N-terminal pro-B-type natriuretic peptide; sCysC, serum cystatin C.

**Figure 3.** ROC analysis when two biomarkers were added to the clinical model for AKI detection. Among 1222 patients, 256 were diagnosed as AKI. ROC, receiver operating characteristic; AKI, acute kidney injury; AUC, area under the receiver operating characteristic curve; CI, confidence interval; sCysC, serum cystatin C; NT-proBNP, N-terminal pro-B-type natriuretic peptide.

1  
2  
3  
4  
5  
6  
7  
8  
9  
10  
11  
12  
13  
14  
15  
16  
17  
18  
19  
20  
21  
22  
23  
24  
25  
26  
27  
28  
29  
30  
31  
32  
33  
34  
35  
36  
37  
38  
39  
40  
41  
42  
43  
44  
45  
46  
47  
48  
49  
50  
51  
52  
53  
54  
55  
56  
57  
58  
59  
60

For peer review only



1  
2  
3  
4  
5  
6  
7  
8  
9  
10  
11  
12  
13  
14  
15  
16  
17  
18  
19  
20  
21  
22  
23  
24  
25  
26  
27  
28  
29  
30  
31  
32  
33  
34  
35  
36  
37  
38  
39  
40  
41  
42  
43  
44  
45  
46  
47  
48  
49  
50  
51  
52  
53  
54  
55  
56  
57  
58  
59  
60



Flowchart for patient selection. ICU, intensive care unit; AKI, acute kidney injury; ESRD, end-stage renal disease; RRT, renal replacement therapy.

170x103mm (144 x 144 DPI)



ROC analysis of the two biomarkers for AKI detection. Among 1222 patients, 256 were diagnosed as AKI. ROC, receiver operating characteristic; AKI, acute kidney injury; AUC, area under the receiver operating characteristic curve; CI, confidence interval; NT-proBNP, N-terminal pro-B-type natriuretic peptide; sCysC, serum cystatin C.

165x132mm (96 x 96 DPI)



ROC analysis when two biomarkers were added to the clinical model for AKI detection. Among 1222 patients, 256 were diagnosed as AKI. ROC, receiver operating characteristic; AKI, acute kidney injury; AUC, area under the receiver operating characteristic curve; CI, confidence interval; sCysC, serum cystatin C; NT-proBNP, N-terminal pro-B-type natriuretic peptide.

165x132mm (96 x 96 DPI)

## TRIPOD Checklist: Prediction Model Development

| Section/Topic                | Item | Checklist Item                                                                                                                                                                                        | Page         |
|------------------------------|------|-------------------------------------------------------------------------------------------------------------------------------------------------------------------------------------------------------|--------------|
| <b>Title and abstract</b>    |      |                                                                                                                                                                                                       |              |
| Title                        | 1    | Identify the study as developing and/or validating a multivariable prediction model, the target population, and the outcome to be predicted.                                                          | 1            |
| Abstract                     | 2    | Provide a summary of objectives, study design, setting, participants, sample size, predictors, outcome, statistical analysis, results, and conclusions.                                               | 4-5          |
| <b>Introduction</b>          |      |                                                                                                                                                                                                       |              |
| Background and objectives    | 3a   | Explain the medical context (including whether diagnostic or prognostic) and rationale for developing or validating the multivariable prediction model, including references to existing models.      | 7-8          |
|                              | 3b   | Specify the objectives, including whether the study describes the development or validation of the model or both.                                                                                     | 8            |
| <b>Methods</b>               |      |                                                                                                                                                                                                       |              |
| Source of data               | 4a   | Describe the study design or source of data (e.g., randomized trial, cohort, or registry data), separately for the development and validation data sets, if applicable.                               | 9-10         |
|                              | 4b   | Specify the key study dates, including start of accrual; end of accrual; and, if applicable, end of follow-up.                                                                                        | 9-10         |
| Participants                 | 5a   | Specify key elements of the study setting (e.g., primary care, secondary care, general population) including number and location of centres.                                                          | 9            |
|                              | 5b   | Describe eligibility criteria for participants.                                                                                                                                                       | 9            |
|                              | 5c   | Give details of treatments received, if relevant.                                                                                                                                                     | NA           |
| Outcome                      | 6a   | Clearly define the outcome that is predicted by the prediction model, including how and when assessed.                                                                                                | 10           |
|                              | 6b   | Report any actions to blind assessment of the outcome to be predicted.                                                                                                                                | NA           |
| Predictors                   | 7a   | Clearly define all predictors used in developing or validating the multivariable prediction model, including how and when they were measured.                                                         | 9-10         |
|                              | 7b   | Report any actions to blind assessment of predictors for the outcome and other predictors.                                                                                                            | NA           |
| Sample size                  | 8    | Explain how the study size was arrived at.                                                                                                                                                            | 9            |
| Missing data                 | 9    | Describe how missing data were handled (e.g., complete-case analysis, single imputation, multiple imputation) with details of any imputation method.                                                  | 9            |
| Statistical analysis methods | 10a  | Describe how predictors were handled in the analyses.                                                                                                                                                 | 9            |
|                              | 10b  | Specify type of model, all model-building procedures (including any predictor selection), and method for internal validation.                                                                         | 11-12        |
|                              | 10d  | Specify all measures used to assess model performance and, if relevant, to compare multiple models.                                                                                                   | 12           |
| Risk groups                  | 11   | Provide details on how risk groups were created, if done.                                                                                                                                             | 11-12        |
| <b>Results</b>               |      |                                                                                                                                                                                                       |              |
| Participants                 | 13a  | Describe the flow of participants through the study, including the number of participants with and without the outcome and, if applicable, a summary of the follow-up time. A diagram may be helpful. | 13, figure 1 |
|                              | 13b  | Describe the characteristics of the participants (basic demographics, clinical features, available predictors), including the number of participants with missing data for predictors and outcome.    | 13           |
| Model development            | 14a  | Specify the number of participants and outcome events in each analysis.                                                                                                                               | 14-15        |
|                              | 14b  | If done, report the unadjusted association between each candidate predictor and outcome.                                                                                                              | 14           |
| Model specification          | 15a  | Present the full prediction model to allow predictions for individuals (i.e., all regression coefficients, and model intercept or baseline survival at a given time point).                           | 13-15        |
|                              | 15b  | Explain how to use the prediction model.                                                                                                                                                              | 14           |
| Model performance            | 16   | Report performance measures (with CIs) for the prediction model.                                                                                                                                      | 14-15        |
| <b>Discussion</b>            |      |                                                                                                                                                                                                       |              |
| Limitations                  | 18   | Discuss any limitations of the study (such as nonrepresentative sample, few events per predictor, missing data).                                                                                      | 23-24        |
| Interpretation               | 19b  | Give an overall interpretation of the results, considering objectives, limitations, and results from similar studies, and other relevant evidence.                                                    | 21-23        |
| Implications                 | 20   | Discuss the potential clinical use of the model and implications for future research.                                                                                                                 | 21-24        |
| <b>Other information</b>     |      |                                                                                                                                                                                                       |              |
| Supplementary information    | 21   | Provide information about the availability of supplementary resources, such as study protocol, Web calculator, and data sets.                                                                         | 25-32        |
| Funding                      | 22   | Give the source of funding and the role of the funders for the present study.                                                                                                                         | 27           |

We recommend using the TRIPOD Checklist in conjunction with the TRIPOD Explanation and Elaboration document.

# BMJ Open

## Serum N-terminal pro-B-type natriuretic peptide and cystatin C for acute kidney injury detection in critically ill adults in China: A prospective, observational study

|                                 |                                                                                                                                                                                                                                                                                                                                                                                                                                                                                                                                                                                                                                                                                                                                                                                                                                                                                                                                                                                                                                                                                                                                                                                                                                                                                                                                                                                      |
|---------------------------------|--------------------------------------------------------------------------------------------------------------------------------------------------------------------------------------------------------------------------------------------------------------------------------------------------------------------------------------------------------------------------------------------------------------------------------------------------------------------------------------------------------------------------------------------------------------------------------------------------------------------------------------------------------------------------------------------------------------------------------------------------------------------------------------------------------------------------------------------------------------------------------------------------------------------------------------------------------------------------------------------------------------------------------------------------------------------------------------------------------------------------------------------------------------------------------------------------------------------------------------------------------------------------------------------------------------------------------------------------------------------------------------|
| Journal:                        | <i>BMJ Open</i>                                                                                                                                                                                                                                                                                                                                                                                                                                                                                                                                                                                                                                                                                                                                                                                                                                                                                                                                                                                                                                                                                                                                                                                                                                                                                                                                                                      |
| Manuscript ID                   | bmjopen-2022-063896.R3                                                                                                                                                                                                                                                                                                                                                                                                                                                                                                                                                                                                                                                                                                                                                                                                                                                                                                                                                                                                                                                                                                                                                                                                                                                                                                                                                               |
| Article Type:                   | Original research                                                                                                                                                                                                                                                                                                                                                                                                                                                                                                                                                                                                                                                                                                                                                                                                                                                                                                                                                                                                                                                                                                                                                                                                                                                                                                                                                                    |
| Date Submitted by the Author:   | 21-Dec-2022                                                                                                                                                                                                                                                                                                                                                                                                                                                                                                                                                                                                                                                                                                                                                                                                                                                                                                                                                                                                                                                                                                                                                                                                                                                                                                                                                                          |
| Complete List of Authors:       | Deng, Jia; Southern Medical University, The Second School of Clinical Medicine; The Second Hospital of Dalian Medical University, Critical Care Medicine<br>He, Linling; Guangdong Academy of Medical Sciences, Department of Intensive Care Unit of Cardiovascular Surgery; Guangdong Academy of Medical Sciences, Department of Critical Care Medicine<br>Liang, Yufan; Maoming People's Hospital, Department of Emergency; Guangdong Medical University<br>Hu, Linhui; Maoming People's Hospital, Department of Critical Care Medicine<br>Xu, Jing; Guangdong Academy of Medical Sciences, Department of Intensive Care Unit of Cardiovascular Surgery; Guangdong Academy of Medical Sciences, Department of Critical Care Medicine<br>Fang, Heng; Guangdong Academy of Medical Sciences, Department of Critical Care Medicine; Guangdong Academy of Medical Sciences, Department of Intensive Care Unit of Cardiovascular Surgery<br>Li, Ying; Guangdong Academy of Medical Sciences, Department of Critical Care Medicine; Guangdong Academy of Medical Sciences, Department of Intensive Care Unit of Cardiovascular Surgery<br>Chen, Chunbo; Southern Medical University, The Second School of Clinical Medicine; Guangdong Cardiovascular Institute, Guangdong General Hospital, Guangdong Academy of Medical Sciences, Department of Intensive Care Unit of Cardiac Surgery |
| <b>Primary Subject Heading</b>: | Intensive care                                                                                                                                                                                                                                                                                                                                                                                                                                                                                                                                                                                                                                                                                                                                                                                                                                                                                                                                                                                                                                                                                                                                                                                                                                                                                                                                                                       |
| Secondary Subject Heading:      | Renal medicine                                                                                                                                                                                                                                                                                                                                                                                                                                                                                                                                                                                                                                                                                                                                                                                                                                                                                                                                                                                                                                                                                                                                                                                                                                                                                                                                                                       |
| Keywords:                       | Acute renal failure < NEPHROLOGY, Adult intensive & critical care < INTENSIVE & CRITICAL CARE, Nephrology < INTERNAL MEDICINE                                                                                                                                                                                                                                                                                                                                                                                                                                                                                                                                                                                                                                                                                                                                                                                                                                                                                                                                                                                                                                                                                                                                                                                                                                                        |
|                                 |                                                                                                                                                                                                                                                                                                                                                                                                                                                                                                                                                                                                                                                                                                                                                                                                                                                                                                                                                                                                                                                                                                                                                                                                                                                                                                                                                                                      |

SCHOLARONE™  
Manuscripts



I, the Submitting Author has the right to grant and does grant on behalf of all authors of the Work (as defined in the below author licence), an exclusive licence and/or a non-exclusive licence for contributions from authors who are: i) UK Crown employees; ii) where BMJ has agreed a CC-BY licence shall apply, and/or iii) in accordance with the terms applicable for US Federal Government officers or employees acting as part of their official duties; on a worldwide, perpetual, irrevocable, royalty-free basis to BMJ Publishing Group Ltd ("BMJ") its licensees and where the relevant Journal is co-owned by BMJ to the co-owners of the Journal, to publish the Work in this journal and any other BMJ products and to exploit all rights, as set out in our [licence](#).

The Submitting Author accepts and understands that any supply made under these terms is made by BMJ to the Submitting Author unless you are acting as an employee on behalf of your employer or a postgraduate student of an affiliated institution which is paying any applicable article publishing charge ("APC") for Open Access articles. Where the Submitting Author wishes to make the Work available on an Open Access basis (and intends to pay the relevant APC), the terms of reuse of such Open Access shall be governed by a Creative Commons licence – details of these licences and which [Creative Commons](#) licence will apply to this Work are set out in our licence referred to above.

Other than as permitted in any relevant BMJ Author's Self Archiving Policies, I confirm this Work has not been accepted for publication elsewhere, is not being considered for publication elsewhere and does not duplicate material already published. I confirm all authors consent to publication of this Work and authorise the granting of this licence.

**Title****Serum N-terminal pro-B-type natriuretic peptide and cystatin C for acute kidney injury detection in critically ill adults in China: A prospective, observational study**

Jia Deng<sup>1,2,3†</sup>, Linling He<sup>2,4,5†</sup>, Yufan Liang<sup>6,7†</sup>, Linhui Hu<sup>8†</sup>, Jing Xu<sup>2,4</sup>, Heng Fang<sup>2,4</sup>, Ying Li<sup>2,4</sup>, Chunbo Chen<sup>1,2,4,9\*</sup>

1. The Second School of Clinical Medicine, Southern Medical University, Guangzhou 510515, Guangdong, China

2. Department of Critical Care Medicine, Guangdong Provincial People's Hospital, Guangdong Academy of Medical Sciences, 106 Zhongshan Er Road, Guangzhou 510080, Guangdong, China.

3. Department of Critical Care Medicine, The Second Hospital of Dalian Medical University, Dalian 116023, Liaoning, China

4. Department of Intensive Care Unit of Cardiovascular Surgery, Guangdong Cardiovascular Institute, Guangdong Provincial People's Hospital, Guangdong Academy of Medical Sciences, Laboratory of South China Structural Heart Disease, 96 Dongchuan Road, Guangzhou 510080, Guangdong, China.

5. Shantou University Medical College, Shantou 515063, Guangdong, China.

6. Department of Emergency, Maoming People's Hospital, 101 Weimin Road, Maoming 525000, Guangdong, China.

7. Guangdong Medical University, Zhanjiang 524023, Guangdong, China

8. Department of Critical Care Medicine, Maoming People's Hospital, 101 Weimin Road, Maoming 525000, Guangdong, China.

9. National Clinical Research Center for Kidney Disease, State Key Laboratory of Organ Failure Research, Nanfang Hospital, Southern Medical University, Guangzhou 510515, Guangdong, China.

1  
2  
3  
4  
5  
6 \* Corresponding author:  
7

8  
9 Chunbo Chen

10  
11 Department of Intensive Care Unit of Cardiovascular Surgery, Guangdong  
12  
13 Cardiovascular Institute, Guangdong Provincial People's Hospital, Guangdong  
14  
15 Academy of Medical Sciences, 96 Dongchuan Road, Guangzhou 510080, Guangdong  
16  
17 Province, People's Republic of China.  
18  
19

20  
21  
22 Email: [gghccm@163.com](mailto:gghccm@163.com)  
23  
24  
25

26  
27 † Jia Deng, Linling He, Yufan Liang and Linhui Hu these authors contributed equally  
28  
29 to this study, Co-first author.  
30  
31

32  
33 1 The Second School of Clinical Medicine, Southern Medical University, Guangzhou  
34  
35 510515, Guangdong, China  
36  
37  
38  
39

40 Email addresses for all authors:  
41

42  
43 Jia Deng: [dengjia19881001@126.com](mailto:dengjia19881001@126.com)  
44

45  
46 Linling He: [906928457@qq.com](mailto:906928457@qq.com)  
47

48  
49 Yufan Liang: [yufan1524@163.com](mailto:yufan1524@163.com)  
50

51  
52 Linhui Hu: [hulinhui@live.cn](mailto:hulinhui@live.cn)  
53

54  
55 Jing Xu: [xjxiaodaifu@163.com](mailto:xjxiaodaifu@163.com)  
56

57  
58 Heng Fang: [1330928862@qq.com](mailto:1330928862@qq.com)  
59

60  
Ying Li: [572257002@qq.com](mailto:572257002@qq.com)



Chunbo Chen: gghccm@163.com

For peer review only

1  
2  
3  
4  
5  
6  
7  
8  
9  
10  
11  
12  
13  
14  
15  
16  
17  
18  
19  
20  
21  
22  
23  
24  
25  
26  
27  
28  
29  
30  
31  
32  
33  
34  
35  
36  
37  
38  
39  
40  
41  
42  
43  
44  
45  
46  
47  
48  
49  
50  
51  
52  
53  
54  
55  
56  
57  
58  
59  
60

## Abstract

**Objective** Serum N-terminal pro-B-type natriuretic peptide (NT-proBNP) and cystatin C (sCysC) are available clinically and beneficial in diagnosing AKI. Our purpose is to identify the performance of their combined diagnosis for AKI in critically ill patients.

**Design** A prospectively-recruited, observational study was performed.

**Setting** Adults admitted to the intensive care unit of a tertiary hospital in China.

**Participants** A total of 1222 critically ill patients were enrolled in the study.

**Main outcome measures** To identify the performance of the combined diagnosis of serum NT-proBNP and sCysC for AKI in critically ill patients. The area under the receiver operating characteristic curve (AUC-ROC), category-free net reclassification index (NRI), and incremental discrimination improvement (IDI) were utilized for comparing the discriminative powers of a combined and single biomarker adjusted model of clinical variables enriched with NTproBNP and Cystatin C for AKI.

## Results

AKI was detected in 256 out of 1222 included patients (20.9%). AUC-ROC for NT-proBNP and sCysC to detect AKI had a significantly higher accuracy than any individual biomarker ( $P < 0.05$ ). After multivariate adjustment, a level of serum NT-proBNP  $\geq 204$  pg/mL was associated with 3.5-fold higher odds for AKI compared with those below the cutoff value. Similar results were obtained for sCysC levels ( $P < 0.001$ ). To detect AKI, adding NT-proBNP and sCysC to a clinical model further increased the AUC-ROC to 0.859 beyond that of the clinical model with or without sCysC ( $P < 0.05$ ). Moreover, the addition of these two to the clinical model significantly improved risk

1  
2  
3  
4 reclassification of AKI beyond that of the clinical model alone or with single biomarker  
5  
6 ( $P < 0.05$ ), as measured by NRI and IDI.  
7  
8

### 9 **Conclusions**

10  
11 In critically ill individuals, serum NT-proBNP, sCysC, and clinical risk factors  
12  
13 combination improve the discriminative power for diagnosing AKI.  
14  
15  
16

### 17 **Keywords**

18  
19 Acute kidney injury, N-terminal pro-B-type natriuretic peptide, Serum cystatin C,  
20  
21  
22 Intensive care unit  
23  
24  
25  
26  
27  
28  
29  
30  
31  
32  
33  
34  
35  
36  
37  
38  
39  
40  
41  
42  
43  
44  
45  
46  
47  
48  
49  
50  
51  
52  
53  
54  
55  
56  
57  
58  
59  
60

### Strengths and limitations of this study

This prospective observational study established a cohort with an adequate sample size.

Rather than solely focusing on the effects of one biomarker, this study also assessed the combine efficacy of serum NT-proBNP and sCysC in detection of AKI.

In this study, multiple logistic regression prediction models were established to detect AKI.

We evaluated the combined efficacy of serum NT-proBNP and sCysC in the diagnosis of AKI by calculating area under the curve and category-free net reclassification index and incremental discrimination improvement.

Dynamic assessment of NT-proBNP and sCysC changes was not available due to only measured their levels at admission. □

## Introduction

Acute kidney injury (AKI) is a predominant clinical syndrome affecting more than 50% of patients who underwent treatment at intensive care unit (ICU)<sup>[1-3]</sup>. Increased morbidity, mortality, hospitalization length, and cost are extremely related to AKI<sup>[4-6]</sup>, so early recognition of AKI is critical to guiding management. Urine production and serum creatinine were employed as diagnostic criteria for AKI in accordance with the recommendations of Kidney Disease Improving Global Outcomes (KDIGO) guidelines<sup>[7]</sup>. Changes in sCr or urine production cannot recognize early renal tubular injury prior to a reduction in glomerular filtration rate<sup>[8,9]</sup>. Therefore, early and reliable AKI biomarkers are necessary to promote timely intervention and minimize complications. However, it is impossible for an individual biomarker to adequately evaluate the risk of AKI as a complex multifactorial syndrome<sup>[3,10]</sup>. Combining diverse biomarkers in a clinical model evaluation could enhance early detection of AKI in critically ill patients<sup>[5,11,12]</sup>.

A hemodynamic marker stress, N-terminal pro-B-type natriuretic peptide (NT-proBNP), has recently received attention as a potential predictor of AKI in a wide diversity of clinical settings<sup>[13-17]</sup>. High serum NT-proBNP level reflects hemodynamic instability, myocardial wall stress, myocardial ischemia, volume overload, sympathetic nervous system and renin-angiotensin-aldosterone system activation, all of which may contribute to AKI incidence<sup>[18-20]</sup>. However, there are finite data on clinical use of NT-proBNP for detecting AKI among critically ill patients.

Serum Cystatin C (sCysC), a 122-amino acid low-molecular-weight protein (13 kDa),

1  
2  
3  
4 is a marker of glomerular filtration<sup>[9]</sup>. CysC has a half-life of about one-third that of  
5  
6 sCr, causing CysC to reach homeostasis three times faster. These properties promote  
7  
8 sCysC as an alternative marker of renal function<sup>[8]</sup>. To date, sCysC has been displayed  
9  
10 to be conducive for the early identification of all-cause AKI<sup>[21]</sup>.  
11  
12

13  
14 Although serum NT-proBNP and sCysC are mainly used for the prognosis  
15  
16 assessment of heart disease and the prediction of acute cardiac events with AKI <sup>[22-26]</sup>,  
17  
18 the diagnostic accuracy of their combination for AKI in ICU remains unknown. We  
19  
20 performed a prospective study in the present research to evaluate the performance of  
21  
22 serum NT-proBNP and sCysC at ICU admission, both independently and in  
23  
24 combination, for AKI determination among critically ill adults.  
25  
26  
27  
28  
29  
30  
31  
32  
33  
34  
35  
36  
37  
38  
39  
40  
41  
42  
43  
44  
45  
46  
47  
48  
49  
50  
51  
52  
53  
54  
55  
56  
57  
58  
59  
60

## Methods

### Study design and participants

At Guangdong Provincial People's Hospital in China, a tertiary care hospital, a prospectively recruited observational research was performed in a mixed medical-surgical ICU. From December 2016 to December 2017, we consecutively enrolled patients aged 18 and up in a row. Pregnancy, renal replacement therapy (RRT) prior to ICU admittance, nephrectomy, end-stage renal disease (ESRD), renal transplant, rejection of consent, or missing admission information were all exclusion criteria. The study protocol strengthened the reporting requirements of observational studies in epidemiology<sup>[27]</sup> and standards for the reporting of diagnostic accuracy<sup>[28]</sup>. This study protocol was authorized by ethics committee of Guangdong Provincial People's Hospital. Additionally, all procedures were carried out consistent with applicable regulations and guidelines. All patients provided written informed consent.

### Data collection

Clinical baseline data were collected prospectively. Within 1 h following ICU admission, blood samples were collected contemporaneously to determine sCr, serum NT-proBNP, and sCysC. Within 24 h after collection, all samples were analyzed in the Guangdong Provincial People's Hospital central laboratory utilizing standard protocol. When a patient is admitted to the ICU, sCr was measured and subsequently done at least once a day until discharge as part of routine clinical care. Throughout admission to ICU, urine production was also been recorded. We evaluated the following clinical variables: age, gender, body mass index (BMI), preexisting clinical conditions, sepsis,

1  
2  
3  
4 admission type, baseline sCr, baseline estimated glomerular filtration rate (eGFR),  
5  
6 Acute Physiology and Chronic Health Evaluation (APACHE) II score, ICU mortality,  
7  
8 in-hospital mortality, duration of ICU admittance, length of hospitalization, ICU costs,  
9  
10 and total costs. The outcome was the incidence of AKI following ICU enrollment  
11  
12 within 1 week. To calculate eGFR, we employed the Chronic Kidney Disease  
13  
14 Epidemiology Collaboration (CKD-EPI) creatinine equation [29].  
15  
16  
17  
18

### 19 **Definitions**

20  
21 The KDIGO classification criteria were utilized to define AKI: as a rise in sCr  
22  
23 by  $\geq 0.3$  mg/dL (26.5 $\mu$ mol/L) within 48 h or a rise in sCr to  $\geq 1.5$  times the  
24  
25 baseline within 1 week, or urine output  $< 0.5$  mL/kg/h for 6 h after ICU  
26  
27 admittance<sup>[7]</sup>.  
28  
29  
30  
31

32 Relying on following principles, ranked in descending order of preference, a  
33  
34 baseline sCr was affirmed<sup>[30]</sup>: (1) prior to ICU admittance, the most recent pre-  
35  
36 ICU value between 30 and 365 days; (2) a stable pre-ICU value  $> 365$  days prior  
37  
38 to ICU admittance for patients  $< 40$  years of age (stable definition is being within  
39  
40 15% of the lowest ICU measurement); (3) pre-ICU value  $> 365$  days prior to  
41  
42 ICU admittance and lower than the initial sCr at ICU admission; (4) a pre-ICU  
43  
44 value (within 3 and 39 days prior to ICU admittance) lower than or equal to the  
45  
46 initial sCr upon ICU admittance not obviously during AKI; (5) the least sCr  
47  
48 value obtained at initial ICU admittance, the most recent ICU value, or the  
49  
50 lowest value achieved to a 365-day follow up.  
51  
52  
53  
54  
55  
56  
57

### 58 **Biomarker measurement**



1  
2  
3  
4 The levels of sCysC and sCr were quantified through the UniCel DxC 800 Synchron  
5  
6 system usage in compliance with the manufacturer's instructions (Beckman Coulter,  
7  
8 Brea, CA, USA). For sCysC, the intra- and inter-assay variation coefficients were 10%  
9  
10 and 5%, respectively. Levels of serum NT-proBNP were quantified through an  
11  
12 electrochemiluminescence immunoassay employing a Cobas® e602 system usage  
13  
14 (Roche Diagnostics, Germany). For NT-proBNP, the uppermost limit of normal for  
15  
16 those who seem to be healthy (95th percentage) has been 125 pg/mL. The coefficient  
17  
18 of interassay variation for NT-proBNP was < 5%. Each patient's clinical features were  
19  
20 blinded to the personnel measuring the biomarkers.  
21  
22  
23  
24  
25

### 26 27 **Patient and public involvement**

28  
29 Patients and/or the public were not involved in the design, or conduct, or reporting, or  
30  
31 dissemination plans of this research.  
32  
33  
34

### 35 36 **Statistical analysis**

37  
38 For statistical analyses, we utilized SPSS version 21.0 (SPSS, Chicago, IL, USA),  
39  
40 MedCalc version 18.2.1 (MedCalc Software, Ostend, Belgium) and R version 4.1.1 (R  
41  
42 Foundation for Statistical Computing, Vienna, Austria). The mean  $\pm$  standard deviation  
43  
44 or median (25th to 75th percentage, interquartile range) had been utilized to express  
45  
46 continuous variables. Numbers (percent) were utilized to represent categorical variables.  
47  
48 For nonnormally distributed continuous variables, the Wilcoxon rank-sum test was  
49  
50 employed for intergroup difference measurement, and for categorical variables, the chi-  
51  
52 square or Fisher's exact test was deployed.  
53  
54  
55  
56

57  
58 NT-proBNP concentrations were extremely skewed and therefore were log<sub>10</sub>  
59  
60

1  
2  
3  
4 transformed before inclusion in the models. Areas under the receiver operating  
5  
6 characteristic curves (AUC-ROCs) were computed. The method exploited by DeLong  
7  
8 et al. was used to compare AUC-ROCs between groups<sup>[31]</sup>. The biomarkers' sensitivity,  
9  
10 specificity, positive and negative predictive values, positive and negative likelihood  
11  
12 ratios of the biomarkers were calculated. Youden's index for AKI detection identified  
13  
14 the optimal cutoff values for individual biomarkers and their combination<sup>[32]</sup>.  
15  
16  
17  
18

19  
20 Logistic analysis was utilized to compute the odds ratios (ORs) and 95% confidence  
21  
22 intervals for each factor: to identify the independent risk factors of AKI, with a forward  
23  
24 stepwise method, in which the clinical variables with  $P < 0.10$  in univariate analysis  
25  
26 were incorporated into the multivariate logistic model. We categorized NT-proBNP and  
27  
28 sCysC levels according to their cutoff values and then performed logistic regression on  
29  
30 the created variables. We conducted multiple logistic regression analyses to calculate  
31  
32 the adjusted ORs of AKI, which was based on the clinical risk factors for AKI.  
33  
34  
35  
36

37  
38 The performance of AKI detection after adding NT-proBNP and sCysC, or any of  
39  
40 them, into the clinical model as categorical variables was assessed by AUC-ROC,  
41  
42 category-free net reclassification improvement (NRI) index and integrated  
43  
44 discrimination improvement (IDI) index, as described previously<sup>[33, 34]</sup>. To better  
45  
46 quantify how accurately the reference and reclassification model would perform with  
47  
48 independent data, we adopted a 10-fold cross-validation<sup>[35]</sup>. All the tests were 2-tailed,  
49  
50 and  $P < 0.05$  was regarded statistically significant.  
51  
52  
53  
54  
55  
56  
57  
58  
59  
60

## Results

### Clinical data and outcomes

A total of 150 (10.9 %) of the 1372 adult patients enrolled in the study were excluded (Figure 1). Therefore, 1222 patients were enrolled and AKI occurred in 256 patients (20.9%). Patient baseline variables and outcomes are exhibited in Table 1. In comparison to patients without AKI, patients with AKI were elderly and were observed more frequently in those with comorbidities, including chronic kidney disease (CKD), hypertension, coronary artery disease (CAD), diabetes mellitus (DM), heart failure (HF), cerebrovascular disease and chronic obstructive pulmonary disease (COPD). Increased sCr, serum NT-proBNP and sCysC levels at admission, as well as increased APACHE II scores, were more prevalent in AKI patients. The baseline sCr and eGFR did not show significant differences between the two groups.

Indeed, AKI patients had a higher risk of adverse outcomes, a higher percentage of ICU and in-hospital mortality, higher expenses, a longer hospitalization duration, and a longer stay in ICU ( $P < 0.001$ ) compared to those without AKI.

### Detective abilities of the two biomarkers for AKI

To demonstrate the ability of these biomarkers for AKI detection, we used AUC-ROCs to calculate the two biomarkers, respectively, and in combination. AUC-ROCs for NT-proBNP and sCysC were computed for AKI detection (0.821 and 0.766, respectively). For AKI detection, NT-proBNP had a sensitivity of 78% and a specificity of 75%, while sCysC had high specificity but limited sensitivity. The cutoff values for NT-proBNP and sCysC were 204 pg/mL and 1.02 mg/L, respectively, yielding good sensitivity and specificity. We included NT-proBNP and sCysC in a multivariate logistic regression model to derived their combined AUC for comparison with the single biomarker's. The AUC-ROCs for AKI presented a better

1  
2  
3  
4 performance by NT-proBNP and sCysC (0.832) than any individual biomarker ( $P < 0.05$ , Table  
5  
6 2 and Figure 2).

### 9 **Multivariate logistic regression analyses of the two biomarkers for AKI detection**

10  
11 We stratified patients based on the two cutoff values of serum NT-proBNP and sCysC levels  
12  
13 into two categories, respectively. Compared to those with serum NT-proBNP  $< 204$  pg/mL,  
14  
15 patients with serum NT-proBNP  $\geq 204$  pg/mL on admission exhibited a higher incidence of  
16  
17 AKI (7.2% versus 45.1%,  $P < 0.001$ ). AKI was found to have higher incidence (46.5%) in  
18  
19 patients with sCysC  $\geq 1.02$  mg/L compared to those with sCysC  $< 1.02$  mg/L (10.2%) ( $P <$   
20  
21 0.001). Following clinical variables adjustment (including CKD, HF, sepsis, admission type,  
22  
23 sCr at admission, and APACHE II scores, Table 3), a level of serum NT-proBNP  $\geq 204$  pg/mL  
24  
25 was associated with 3.5-fold higher odds for AKI compared with NT-proBNP level below the  
26  
27 cutoff value ( $P < 0.001$ ). Similarly, patients with sCysC  $\geq 1.02$  mg/L were linked to 2.6-fold  
28  
29 greater odds for AKI compared to those with sCysC  $< 1.02$  mg/L ( $P < 0.001$ ) (Table 4).

### 37 **Discrimination and reclassification of the combination of biomarkers and clinical models** 38 39 **for AKI**

40  
41  
42 Considering the effect of adding NT-proBNP and sCysC, or any of them, to a clinical model as  
43  
44 categorical variables for AKI detection, logistic regression analysis was employed. On ICU  
45  
46 admittance for AKI diagnosis, potential available variables including age, sepsis, admission  
47  
48 type, sCr, and APACHE II scores as well as comorbidities, including hypertension, DM, CKD,  
49  
50 cerebrovascular disease, COPD, CAD, and HF were considered. The clinical model for  
51  
52 detecting AKI involved CKD, HF, sepsis, admission type, sCr at admission, and APACHE II  
53  
54 scores (Table 3). The cross-validated baseline performance characterized by accuracy and  
55  
56  
57  
58  
59  
60

1  
2  
3  
4 Kappa for the clinical model was 0.844 and 0.448.  
5

6 To evaluate the enhancement of discriminative capacity, a panel of NT-proBNP and sCysC  
7  
8 was introduced to the above-mentioned model. As shown in Table 5, compared with the clinical  
9  
10 model, the addition of NT-proBNP to the clinical model had a higher AUC-ROC ( $P < 0.05$ ),  
11  
12 and no statistically significant variation existed when sCyC was added to the clinical model.  
13  
14 However, the risk reclassification was markedly improved through the addition of NT-proBNP  
15  
16 or sCyC to the clinical model, as measured by category-free NRI and IDI ( $P < 0.05$ ). Adding  
17  
18 NT-proBNP and sCysC to a clinical model for AKI detection further increased the AUC-ROC  
19  
20 to 0.859 beyond that of the clinical model with or without sCysC ( $P < 0.05$ ) (Figure 3). The  
21  
22 cross-validated baseline performance characterized by accuracy and Kappa for the clinical  
23  
24 model enriched with NTproBNP and Cystatin C was 0.848 and 0.475. Moreover, this panel  
25  
26 addition to the clinical model significantly enhanced the risk reclassification of AKI beyond  
27  
28 that of the clinical model with or without any individual biomarkers ( $P < 0.05$ ), with maximum  
29  
30 NRI (0.531) and IDI (0.038).  
31  
32  
33  
34  
35  
36  
37  
38  
39  
40  
41  
42  
43  
44  
45  
46  
47  
48  
49  
50  
51  
52  
53  
54  
55  
56  
57  
58  
59  
60

**Table 1** Clinical data and outcomes

| Characteristics                              | Total (n=1222)            | AKI (n=256)                 | No AKI (n=966)            | P value |
|----------------------------------------------|---------------------------|-----------------------------|---------------------------|---------|
| Age, years                                   | 57 (45-67)                | 63.5 (52-72)                | 55 (44-65)                | <0.001  |
| Male, n (%)                                  | 666 (54.5)                | 151 (59.0)                  | 515 (53.3)                | 0.105   |
| BMI, kg/m <sup>2</sup>                       | 22 (19.6-24.7)            | 22.3 (19.9-25.0)            | 21.9 (19.6-24.6)          | 0.395   |
| <b>Preexisting clinical conditions</b>       |                           |                             |                           |         |
| Hypertension, n (%)                          | 252 (20.6)                | 81 (31.6)                   | 171 (17.7)                | <0.001  |
| Diabetes mellitus, n (%)                     | 121 (9.9)                 | 52 (20.3)                   | 69 (7.1)                  | <0.001  |
| Chronic kidney disease, n (%)                | 26 (2.1)                  | 21 (8.2)                    | 5 (0.5)                   | <0.001  |
| Cerebrovascular disease, n (%)               | 127 (10.4)                | 50 (19.5)                   | 77 (8.0)                  | <0.001  |
| Chronic obstructive pulmonary disease, n (%) | 35 (2.9)                  | 18 (7.0)                    | 17 (1.8)                  | <0.001  |
| Coronary artery disease, n (%)               | 53 (4.3)                  | 24 (9.4)                    | 29 (3.0)                  | <0.001  |
| Heart failure, n (%)                         | 31 (2.5)                  | 22 (8.6)                    | 9 (0.9)                   | <0.001  |
| Cancer, n (%)                                | 227 (18.6)                | 50 (19.5)                   | 177 (18.3)                | 0.659   |
| Sepsis, n (%)                                | 98 (8.0)                  | 70 (27.3)                   | 28 (2.9)                  | <0.001  |
| <b>Admission type, n (%)</b>                 |                           |                             |                           |         |
| Elective surgical, n (%)                     | 863 (70.6)                | 84 (32.8)                   | 779 (80.6)                | <0.001  |
| Emergency surgical, n (%)                    | 83 (6.8)                  | 33 (12.9)                   | 50 (5.2)                  | <0.001  |
| Medical, n (%)                               | 276 (22.6)                | 139 (54.3)                  | 137 (14.2)                | <0.001  |
| Baseline serum creatinine, mg/dL             | 0.78 (0.64-0.96)          | 0.76 (0.58-1.09)            | 0.79 (0.65-0.94)          | 0.949   |
| Baseline eGFR, mL/min/1.73 m <sup>2</sup>    | 119.4 (97.6-145.4)        | 122.9 (83.3-158.7)          | 118.7 (100.4-142.9)       | 0.950   |
| <b>Parameters at ICU admission</b>           |                           |                             |                           |         |
| Cr, mg/dl                                    | 0.87 (0.72-1.07)          | 0.97 (0.72-1.55)            | 0.85 (0.72-1.02)          | <0.001  |
| NT-proBNP, pg/mL                             | 97.1 (29.4-464.4)         | 871.0 (225.8-2919.3)        | 66.2 (23.7-206.2)         | <0.001  |
| sCysC, mg/L                                  | 0.78 (0.61-1.06)          | 1.15 (0.83-1.85)            | 0.75 (0.58-0.94)          | <0.001  |
| APACHE II score                              | 7 (4-10)                  | 11 (8-16)                   | 6 (4-9)                   | <0.001  |
| UP, ml/kg/h                                  | 1.67 (1.20-2.26)          | 1.37 (0.89-2.20)            | 1.73 (1.26-2.27)          | <0.001  |
| <b>Outcomes</b>                              |                           |                             |                           |         |
| ICU mortality, n (%)                         | 40 (3.3)                  | 33 (12.9)                   | 7 (0.7)                   | <0.001  |
| In-hospital mortality, n (%)                 | 53 (4.3)                  | 40 (15.6)                   | 13 (1.3)                  | <0.001  |
| ICU stay, days                               | 2 (2-4)                   | 6 (3-13.3)                  | 2 (2-3)                   | <0.001  |
| Hospital stay, days                          | 16 (12-23)                | 22 (13-33.3)                | 15 (11-21)                | <0.001  |
| ICU costs, CNY                               | 39461.7 (28966.2-59437.2) | 66140.1 (36526.0-131843.8)  | 37667.5 (27881.5-48238.4) | <0.001  |
| Total costs, CNY                             | 58295.3 (44201.6-98602.8) | 128945.6 (71506.8-199685.4) | 52773.8 (40856.2-78718.9) | <0.001  |

Abbreviations: AKI, acute kidney injury; BMI, body mass index; eGFR, estimated glomerular filtration rate; ICU, intensive care unit; sCr, serum creatinine, NT-proBNP, N-terminal pro-B-type natriuretic peptide; sCysC, serum cystatin C; APACHE II score, acute physiology and chronic health evaluation II score; UP, Urine production first 24 h after admission; CNY, Chinese yuan.

Continuous variables are expressed as mean  $\pm$  standard deviation or median (25th to 75th percentile, interquartile range). Categorical variables are expressed as a n (%).

**Table 2** Detective characteristics of the two biomarkers for AKI

| Logistic regression models | AUC-ROC <sup>a</sup> (95%CI)     | Cutoff <sup>b</sup> | Sensitivity | Specificity | (+) LR | (-) LR | PPV  | NPV  |
|----------------------------|----------------------------------|---------------------|-------------|-------------|--------|--------|------|------|
| sCysC                      | 0.766 (0.741-0.789)              | 1.02 mg/L           | 0.66        | 0.80        | 3.28   | 0.43   | 0.47 | 0.90 |
| NT-proBNP                  | 0.821 (0.799-0.842) <sup>c</sup> | 204.00 pg/mL        | 0.78        | 0.75        | 3.12   | 0.29   | 0.45 | 0.93 |
| NT-proBNP+ sCysC           | 0.832 (0.809-0.852) <sup>d</sup> | 0.15 <sup>e</sup>   | 0.84        | 0.69        | 2.69   | 0.23   | 0.42 | 0.94 |

Abbreviations: AKI, acute kidney injury; AUC-ROC, area under the receiver operating characteristic curve; CI, confidence interval; (+) LR, Positive likelihood ratio; (-) LR, negative likelihood ratio; PPV, Positive predictive value; NPV, Negative predictive value; sCysC, Serum cystatin C; NT-proBNP, N-terminal pro-B-type natriuretic peptide.

<sup>a</sup> Values are presented as AUC-ROC (95% CI)

<sup>b</sup> Ideal cutoff value according to Youden's index

<sup>c</sup>  $P < 0.05$  vs. sCysC ( $P=0.0011$ )

<sup>d</sup>  $P < 0.05$  vs. NT-proBNP ( $P=0.0145$ ), sCysC ( $P<0.0001$ )

<sup>e</sup> Cutoff points of the biomarker panels were the predicted probabilities generated from the multiple logistic regression model

**Table 3** Logistic analyses of clinical risk factors for AKI detection

| Variables                             | Univariate analysis   |                | Multivariate model   |                |
|---------------------------------------|-----------------------|----------------|----------------------|----------------|
|                                       | OR (95% CI)           | <i>P</i> value | OR (95% CI)          | <i>P</i> value |
| Age                                   | 1.029 (1.019-1.038)   | <0.001         |                      |                |
| Hypertension                          | 2.152 (1.577-2.937)   | <0.001         |                      |                |
| Diabetes mellitus                     | 3.314 (2.242-4.898)   | <0.001         |                      |                |
| Chronic kidney disease                | 17.175 (6.410-46.023) | <0.001         | 4.182 (1.250-13.998) | 0.020          |
| Cerebrovascular disease               | 2.802 (1.903-4.126)   | <0.001         |                      |                |
| Chronic obstructive pulmonary disease | 4.222 (2.143-8.316)   | <0.001         |                      |                |
| Coronary artery disease               | 3.342 (1.910-5.849)   | <0.001         |                      |                |
| Heart failure                         | 9.997 (4.544-21.997)  | <0.001         | 3.487 (1.365-8.911)  | 0.009          |
| Sepsis                                | 12.608 (7.914-20.084) | <0.001         | 5.033 (2.914-8.692)  | <0.001         |
| Admission type                        |                       | <0.001         |                      | <0.001         |
| Elective surgical                     | 1.0 (Referent)        |                | 1.0 (Referent)       |                |
| Emergency surgical                    | 6.121 (3.735-10.030)  | <0.001         | 3.493 (2.023-6.032)  | <0.001         |
| Medical                               | 9.409 (6.791-13.037)  | <0.001         | 3.237 (2.157-4.858)  | <0.001         |
| sCr                                   | 3.135 (2.385-4.120)   | <0.001         | 1.538 (1.149-2.058)  | 0.004          |
| APACHE II score                       | 1.215 (1.182-1.249)   | <0.001         | 1.101 (1.066-1.137)  | <0.001         |

Abbreviations: AKI, acute kidney injury; OR, odds ratio; CI, confidence interval; sCr, serum creatinine; APACHE II score, acute physiology and chronic health evaluation II score.



**Table 4** Multivariate logistic regression analyses of the two biomarkers for AKI detection

| Variables                                    | AKI, % | Unadjusted OR (95% CI) | <i>P</i> value | Adjusted OR <sup>a</sup> (95% CI) | <i>P</i> value |
|----------------------------------------------|--------|------------------------|----------------|-----------------------------------|----------------|
| NT-proBNP (pg/mL, n)                         |        |                        |                |                                   |                |
| <204, 779                                    | 7.2    | 1.0 (Referent)         |                | 1.0 (Referent)                    |                |
| ≥204, 443                                    | 45.1   | 10.626 (7.639-14.781)  | <0.001         | 3.460 (2.307-5.189)               | <0.001         |
| sCysC layered by the cut-off value (mg/L, n) |        |                        |                |                                   |                |
| <1.02, 861                                   | 10.2   | 1.0 (Referent)         |                | 1.0 (Referent)                    |                |
| ≥1.02, 361                                   | 46.5   | 7.646 (5.651-10.345)   | <0.001         | 2.649 (1.842-3.810)               | <0.001         |

Abbreviations: AKI, acute kidney injury; OR, odds ratio; CI, confidence interval, NT-proBNP, N-terminal pro-B-type natriuretic peptide; sCysC, Serum cystatin C.

<sup>a</sup> Adjusted for chronic kidney disease, heart failure, sepsis, admission type, serum creatinine at admission and acute physiology and chronic health evaluation II score.

**Table 5** Discrimination and reclassification of the combination of biomarkers and clinical model for AKI

|                                                                     | AUC-ROC (95%CI)     | <i>P</i> value <sup>a</sup> | Category-Free NRI (95%CI) | <i>P</i> value <sup>a</sup> | IDI (95%CI)         | <i>P</i> value <sup>a</sup> |
|---------------------------------------------------------------------|---------------------|-----------------------------|---------------------------|-----------------------------|---------------------|-----------------------------|
| Clinical model <sup>b</sup>                                         | 0.840 (0.812-0.868) |                             |                           |                             |                     |                             |
| Clinical model + sCysC                                              | 0.847 (0.819-0.874) | 0.163                       | 0.193 (0.052-0.405)       | 0.036                       | 0.017 (0.009-0.026) | <0.001                      |
| Clinical model + NT-proBNP                                          | 0.855 (0.828-0.882) | 0.013                       | 0.462 (0.196-0.747)       | 0.001                       | 0.028 (0.016-0.039) | <0.001                      |
| Clinical model + NT-proBNP + sCysC                                  | 0.859 (0.832-0.885) | 0.006                       | 0.531 (0.238-0.741)       | <0.001                      | 0.038 (0.025-0.051) | <0.001                      |
| Clinical model + NT-proBNP + sCysC vs<br>Clinical model + sCysC     | -                   | 0.015                       | 0.328 (0.139-0.553)       | 0.002                       | 0.021 (0.010-0.031) | <0.001                      |
| Clinical model + NT-proBNP + sCysC vs<br>Clinical model + NT-proBNP | -                   | 0.223                       | 0.167 (0.013-0.285)       | 0.017                       | 0.011 (0.004-0.018) | 0.003                       |

Abbreviations: AUC-ROC, area under the receiver operating characteristic curve; NRI, net reclassification index; IDI, incremental discrimination improvement; AKI, acute kidney injury; CI, confidence interval; sCysC, serum cystatin C; NT-proBNP, N-terminal pro-B-type natriuretic peptide.

a Biomarker + clinical model versus clinical model.

b The clinical model for detecting AKI is composed of chronic kidney disease, heart failure, sepsis, Admission type, serum creatinine at admission and acute physiology and chronic health evaluation II score.

Hosmer–Lemeshow goodness-of-fit test: for clinical model, chi-squared value=14.249(P=0.075); for clinical model + sCysC, chi-squared value=6.971 (P=0.54); for clinical model + NT-proBNP, chi-squared value=9.362 (P=0.313); or clinical model + NT-proBNP +sCysC, chi-squared value=4.245 (P=0.834).

## Discussion

The study's key finding was that the combination of NT-proBNP and sCysC yields greater discriminative ability for AKI detection at ICU admission with or without a clinical model in critically ill adults. The finding indicates that assessing both serum NT-proBNP and sCysC levels on admission may assist with the early diagnosis and risk stratification of AKI in critically ill adults.

One of the most prevalent complications occurring in a variety of clinical settings is AKI, especially for critically ill patients<sup>[4, 6, 36, 37]</sup>. The development of AKI, as the same as its severity, is strongly associated with increased mortality<sup>[3, 36]</sup>. However, early identification is challenging when sCr or urine production changes are used to detect AKI<sup>[38]</sup>, and precise clinical predictors are not widely known. Numerous studies have found and confirmed the accuracy and additional clinical benefits of these renal biomarkers for early AKI diagnosis, such as insulin-like growth factor-binding protein, matrix metalloproteinase-7, tissue inhibitor metalloproteinase-2, angiotensinogen, sCysC, neutrophil gelatinase-associated lipocalin and so on<sup>[5, 9, 12, 39, 40]</sup>. However, some novel biomarkers are not being used in clinical practice, due to insufficient evidence or previously unavailable commercially. Thus, the rational application of clinically available biomarkers is more practical and economical.

NT-proBNP, a widely used marker of hemodynamic stress, is a polypeptide secreted by the ventricles and its role is to facilitate natriuresis<sup>[17, 41]</sup>. In patients with elevated CVP, the raised pressure may be transmitted to the renal veins, resulting in renal congestion and reduced glomerular filtration<sup>[14, 42, 43]</sup>. It makes sense that NT-proBNP is associated with the development of AKI. The clinical application of serum NT-proBNP in cardiac disease has been

1  
2  
3  
4 extensively confirmed and finds its predictive value for AKI development in patients with HF,  
5  
6 coronary angiography, or percutaneous coronary intervention [19, 23, 44, 45]. Several studies have  
7  
8 elucidated the link between NT-proBNP and AKI incidence after cardiac or noncardiac  
9  
10 surgery<sup>[13, 46-48]</sup>. However, its utility for AKI detection has not been fully evaluated in general  
11  
12 ICU, and it is necessary to verify the reliability and universality of NT-proBNP in  
13  
14 heterogeneous populations. The data demonstrated herein not only maintain NT-proBNP as a  
15  
16 risk factor for AKI but also indicate that it can enhance the risk reclassification and  
17  
18 discrimination for AKI in ICU.  
19  
20  
21  
22  
23

24  
25 A single biomarker is insufficient to express the multiple pathophysiological mechanisms of  
26  
27 AKI, especially for critically ill patients, as AKI is a heterogeneous syndrome<sup>[9, 10]</sup>. There is no  
28  
29 consensus on which specific markers should be combined to detect AKI. Numerous studies  
30  
31 have revealed that combining different biomarkers utilized to detect AKI can improve  
32  
33 predictive abilities<sup>[5, 49, 50]</sup>. Naruse et al. showed that combining urinary liver-type fatty-acid  
34  
35 binding protein and serum NT-proBNP can enhance early prediction of AKI in patients in  
36  
37 medical cardiac ICUs<sup>[15]</sup>. Similar to such studies, we identified that the combination of two  
38  
39 markers, serum NT-proBNP and sCysC, improved the diagnostic performance of AKI.  
40  
41  
42  
43  
44

45  
46 CysC is a glomerular filtration biomarker that can be utilized to anticipate the development  
47  
48 of AKI and undesirable outcomes<sup>[8, 9]</sup>. The application and performance of CysC for AKI  
49  
50 prediction have been demonstrated in various clinical settings<sup>[5, 11, 51-53]</sup>. In individuals with ST-  
51  
52 segment elevation myocardial infarction, a combination of B-type natriuretic peptide and CysC  
53  
54 may contribute to risk stratification for AKI<sup>[25]</sup>. In the present cohort, sCysC had a slightly  
55  
56 higher specificity than NT-proBNP in the detection of AKI, but its sensitivity is limited. The  
57  
58  
59  
60

1  
2  
3  
4 ability of sCysC for detecting AKI was fine, but its AUC-ROC was not as great as NT-proBNP.  
5  
6 Moreover, the combination of serum NT-proBNP and sCysC at ICU admission had the highest  
7  
8 AUC-ROC. These data indicate that the simultaneous measurement of serum NT-proBNP and  
9  
10 sCysC at ICU admission could improve the early identification of AKI.  
11  
12

13  
14 Biomarkers for AKI, which indicates the various underlying pathophysiological mechanisms  
15  
16 involved in AKI incidence, might be superior to individual biomarkers alone<sup>[3, 6]</sup>. It is also  
17  
18 important that these biomarkers profit from being easily measurable, readily accessible,  
19  
20 comparatively cheap, and with an elevated level of sensitivity and specificity. In the present  
21  
22 study, for AKI detection NT-proBNP acted as a hemodynamic stress biomarker with high  
23  
24 sensitivity and specificity, and sCysC had high specificity as a functional biomarker. Even after  
25  
26 clinical risk variables adjustment, elevated NT-proBNP is an independent risk factor for AKI.  
27  
28 The NT-proBNP addition to the clinical model significantly enhanced risk reclassification, as  
29  
30 demonstrated by category-free NRI and IDI. Moreover, our results identified that the addition  
31  
32 of NT-proBNP to sCysC markedly improved their detective abilities as biomarkers. Adding  
33  
34 biomarkers to the clinical model further improved the diagnostic accuracy of AKI, as measured  
35  
36 by AUC-ROCs. These data suggest that a single biomarker is insufficient for early diagnosis of  
37  
38 AKI. Therefore, the method of combining different biomarkers may be of greater use.  
39  
40  
41  
42  
43  
44  
45  
46  
47

48 There are some limitations for this study. First, it was a single-center study, with an unproven  
49  
50 external validity. Second, there were only 26 patients with CKD patients and 31 HF patients  
51  
52 enrolled, and hence we were unable to stratify our group relying on eGFR or cardiac function  
53  
54 at baseline. Accordingly, future studies should be administrated in these subgroups. Last, we  
55  
56 did not accomplish routine echocardiography in all patients to associate NT-proBNP levels with  
57  
58  
59  
60

1  
2  
3  
4 ventricular dilatation or other pathways that may promote NT-proBNP release. Despite these  
5  
6 limitations, we believe that our findings have clinical implications and should facilitate further  
7  
8 research to confirm our results.  
9

## 10 **Conclusion**

11  
12 In the present cohort, simultaneous measurement of NT-proBNP and sCysC at ICU admission  
13  
14 increases the early identification of AKI beyond that of biomarker in isolation, and that the  
15  
16 combination of the two biomarkers and clinical risk factors improves the discriminative ability  
17  
18 for AKI detection in critically ill adults.  
19  
20  
21  
22  
23  
24  
25  
26  
27  
28  
29  
30  
31  
32  
33  
34  
35  
36  
37  
38  
39  
40  
41  
42  
43  
44  
45  
46  
47  
48  
49  
50  
51  
52  
53  
54  
55  
56  
57  
58  
59  
60

## Abbreviations

(-) LR, negative likelihood ratios

(+) LR, positive likelihood ratios

AKI, Acute kidney injury

APACHE II score, Acute Physiology and Chronic Health Evaluation II score

AUC-ROC, area under the receiver operating characteristic curve

BMI, body mass index

CAD, coronary artery disease

CI, confidence interval

CNY, Chinese yuan

CKD, chronic kidney disease

CKD-EPI, Chronic Kidney Disease Epidemiology Collaboration

COPD, chronic obstructive pulmonary disease

DM, diabetes mellitus

eGFR, estimated glomerular filtration rate

ESRD, end-stage renal disease

HF, heart failure

ICU, intensive care unit

IDI, incremental discrimination improvement

KDIGO, Kidney Disease Improving Global Outcomes

NPV, negative predictive values

NRI net reclassification index

1  
2  
3  
4 NT-proBNP, N-terminal pro-B-type natriuretic peptide  
5

6 ORs, odds ratios  
7

8  
9 PPV, positive predictive values  
10

11 RRT, renal replacement therapy  
12

13  
14 sCr, serum creatinine  
15

16  
17 sCysC, serum cystatin C  
18

19 UP, Urine production first 24 h after admission  
20  
21  
22  
23

## 24 **Acknowledgements**

25  
26  
27 The authors thank all the doctors, nurses, technicians, and patients at the Guangdong Provincial  
28  
29 People's Hospital for their dedication in the study.  
30  
31  
32  
33  
34

## 35 **Authors' contributions**

36  
37 JD, LLH, YFL and LHH equally contributed to the design of the research, analysis and  
38  
39 interpretation of the data. CBC and JD contributed to the conception and design of the research  
40  
41 as well as interpretation of the data, and critically revised the manuscript. JD, LLH, YFL, LHH,  
42  
43 JX, HF and YL performed the research and collected data. All authors contributed to the  
44  
45 acquisition and analysis of the data, drafted the manuscript, and agree to be fully accountable  
46  
47 for ensuring the integrity and accuracy of the work. All authors read and approved the final  
48  
49 manuscript.  
50  
51  
52  
53  
54  
55  
56  
57  
58  
59  
60



## **Funding**

The study was supported by Chunbo Chen's research grants from the National Natural Science Foundation of China [82172162], the Major Program of Summit Project, Guangdong Province High-level Hospital Construction Project of Guangdong Provincial People's Hospital, Guangdong Academy of Medical Sciences [DFJH2020028] and the Office of Talent Work Leading Group in Maoming (number of MaoRenCaiBan [2020]24).

## **Availability of data and materials**

The datasets generated and/or analyzed during this study are not publicly available, owing to currently ongoing research studies, but the data are available from the corresponding author on reasonable request.

## **Ethics approval and consent to participate**

The ethics committee of the Guangdong Provincial People's Hospital approved the study design, protocol, ethical issue, and data and sample collection (No. GDREC2015396H(R1)). Written informed consent was obtained from each patient or from the appropriate surrogates.

## **Patient consent for publication**

Not required.

## **Consent for publication**

Not applicable. No individual personal data are included in the study. All patients provided necessary consent to participate in the present study.

## **Competing interests**

1  
2  
3  
4 The authors declare that they have no competing interests.  
5  
6  
7  
8

9  
10 **Uncategorized References**  
11

- 12  
13 1. Hoste EA, Bagshaw SM, Bellomo R, Cely CM, Colman R, Cruz DN, Edipidis K, Forni LG,  
14  
15 Gomersall CD, Govil D *et al*: **Epidemiology of acute kidney injury in critically ill patients: the**  
16  
17 **multinational AKI-EPI study**. *Intensive care medicine* 2015, **41**(8):1411-1423.  
18  
19  
20 2. Srisawat N, Kulvichit W, Mahamitra N, Hurst C, Praditpornsilpa K, Lumlertgul N, Chuasuwan A,  
21  
22 Trongtrakul K, Tasnarong A, Champunot R *et al*: **The epidemiology and characteristics of acute**  
23  
24 **kidney injury in the Southeast Asia intensive care unit: a prospective multicentre study**.  
25  
26 *Nephrology, dialysis, transplantation : official publication of the European Dialysis and*  
27  
28 *Transplant Association - European Renal Association* 2020, **35**(10):1729-1738.  
29  
30  
31 3. Ronco C, Bellomo R, Kellum JA: **Acute kidney injury**. *Lancet (London, England)* 2019,  
32  
33 **394**(10212):1949-1964.  
34  
35  
36 4. Levey AS, James MT: **Acute Kidney Injury**. *Annals of internal medicine* 2017, **167**(9):itc66-itc80.  
37  
38  
39 5. Deng Y, Chi R, Chen S, Ye H, Yuan J, Wang L, Zhai Y, Gao L, Zhang D, Hu L *et al*: **Evaluation**  
40  
41 **of clinically available renal biomarkers in critically ill adults: a prospective multicenter**  
42  
43 **observational study**. *Critical care (London, England)* 2017, **21**(1):46.  
44  
45  
46 6. Liu KD, Goldstein SL, Vijayan A, Parikh CR, Kashani K, Okusa MD, Agarwal A, Cerdá J:  
47  
48 **AKI!Now Initiative: Recommendations for Awareness, Recognition, and Management of AKI**.  
49  
50 *Clinical journal of the American Society of Nephrology : CJASN* 2020, **15**(12):1838-1847.  
51  
52  
53 7. **Kidney Disease: Improving Global Outcomes (KDIGO) Acute Kidney Injury Work Group. KDIGO**  
54  
55 **Clinical Practice Guideline for Acute Kidney Injury**. 2012.  
56  
57  
58  
59  
60

- 1  
2  
3  
4 8. Teo SH, Endre ZH: **Biomarkers in acute kidney injury (AKI)**. *Best practice & research Clinical anaesthesiology* 2017, **31**(3):331-344.  
5  
6  
7  
8  
9 9. Albert C, Haase M, Albert A, Zapf A, Braun-Dullaeus RC, Haase-Fielitz A: **Biomarker-Guided Risk Assessment for Acute Kidney Injury: Time for Clinical Implementation?** *Annals of laboratory medicine* 2021, **41**(1):1-15.  
10  
11  
12  
13  
14  
15  
16  
17 10. McCullough PA, Shaw AD, Haase M, Bouchard J, Waikar SS, Siew ED, Murray PT, Mehta RL, Ronco C: **Diagnosis of acute kidney injury using functional and injury biomarkers: workgroup statements from the tenth Acute Dialysis Quality Initiative Consensus Conference**. *Contributions to nephrology* 2013, **182**:13-29.  
18  
19  
20  
21  
22  
23  
24  
25  
26  
27 11. Deng Y, Ma J, Hou Y, Zhou D, Hou T, Li J, Liang S, Tan N, Chen C: **Combining Serum Cystatin C and Urinary N-Acetyl-Beta-D-Glucosaminidase Improves the Precision for Acute Kidney Injury Diagnosis after Resection of Intracranial Space-Occupying Lesions**. *Kidney & blood pressure research* 2020, **45**(1):142-156.  
28  
29  
30  
31  
32  
33  
34  
35  
36  
37  
38 12. Yang X, Chen C, Tian J, Zha Y, Xiong Y, Sun Z, Chen P, Li J, Yang T, Ma C *et al*: **Urinary Angiotensinogen Level Predicts AKI in Acute Decompensated Heart Failure: A Prospective, Two-Stage Study**. *Journal of the American Society of Nephrology : JASN* 2015, **26**(8):2032-2041.  
39  
40  
41  
42  
43  
44  
45  
46  
47  
48 13. Cardinale D, Cosentino N, Moltrasio M, Sandri MT, Petrella F, Colombo A, Bacchiani G, Tessitore A, Bonomi A, Veglia F *et al*: **Acute kidney injury after lung cancer surgery: Incidence and clinical relevance, predictors, and role of N-terminal pro B-type natriuretic peptide**. *Lung cancer (Amsterdam, Netherlands)* 2018, **123**:155-159.  
49  
50  
51  
52  
53  
54  
55  
56  
57  
58 14. Haines R, Crichton S, Wilson J, Treacher D, Ostermann M: **Cardiac biomarkers are associated**  
59  
60

- 1  
2  
3  
4 with maximum stage of acute kidney injury in critically ill patients: a prospective analysis. *Critical*  
5  
6 *care (London, England)* 2017, **21**(1):88.  
7  
8
- 9 15. Naruse H, Ishii J, Takahashi H, Kitagawa F, Nishimura H, Kawai H, Muramatsu T, Harada M,  
10  
11 Yamada A, Motoyama S *et al.* Predicting acute kidney injury using urinary liver-type fatty-acid  
12  
13 binding protein and serum N-terminal pro-B-type natriuretic peptide levels in patients treated at  
14  
15 medical cardiac intensive care units. *Critical care (London, England)* 2018, **22**(1):197.  
16  
17
- 18 16. Schaub JA, Coca SG, Moledina DG, Gentry M, Testani JM, Parikh CR: Amino-Terminal Pro-B-  
19  
20 Type Natriuretic Peptide for Diagnosis and Prognosis in Patients With Renal Dysfunction: A  
21  
22 Systematic Review and Meta-Analysis. *JACC Heart failure* 2015, **3**(12):977-989.  
23  
24  
25
- 26 17. Wiese S, Breyer T, Dragu A, Wakili R, Burkard T, Schmidt-Schweda S, Füchtbauer EM,  
27  
28 Dohrmann U, Beyersdorf F, Radicke D *et al.* Gene expression of brain natriuretic peptide in  
29  
30 isolated atrial and ventricular human myocardium: influence of angiotensin II and diastolic fiber  
31  
32 length. *Circulation* 2000, **102**(25):3074-3079.  
33  
34  
35
- 36 18. Damman K, Testani JM: The kidney in heart failure: an update. *European heart journal* 2015,  
37  
38 **36**(23):1437-1444.  
39  
40  
41
- 42 19. Goussot S, Mousson C, Guenancia C, Stamboul K, Brunel P, Brunet D, Touzery C, Cottin Y,  
43  
44 Zeller M: N-Terminal Fragment of Pro B-type Natriuretic Peptide as a Marker of Contrast-  
45  
46 Induced Nephropathy After Primary Percutaneous Coronary Intervention for ST-Segment  
47  
48 Elevation Myocardial Infarction. *The American journal of cardiology* 2015, **116**(6):865-871.  
49  
50  
51
- 52 20. Yamashita T, Seino Y, Ogawa A, Ogata K, Fukushima M, Tanaka K, Mizuno K: N-terminal pro-  
53  
54 BNP is a novel biomarker for integrated cardio-renal burden and early risk stratification in  
55  
56 patients admitted for cardiac emergency. *Journal of cardiology* 2010, **55**(3):377-383.  
57  
58  
59  
60

- 1  
2  
3  
4 21. Herget-Rosenthal S, Marggraf G, Hüsing J, Göring F, Pietruck F, Janssen O, Philipp T, Kribben  
5  
6 A: **Early detection of acute renal failure by serum cystatin C.** *Kidney international* 2004,  
7  
8 **66(3):1115-1122.**  
9  
10  
11 22. Carrasco-Sánchez FJ, Pérez-Calvo JI, Morales-Rull JL, Galisteo-Almeda L, Páez-Rubio I,  
12  
13 Barón-Franco B, Aguayo-Canela M, Pujol-De la llave E: **Heart failure mortality according to**  
14  
15 **acute variations in N-terminal pro B-type natriuretic peptide and cystatin C levels.** *Journal of*  
16  
17 *cardiovascular medicine (Hagerstown, Md)* 2014, **15(2):115-121.**  
18  
19  
20 23. Linzbach S, Samigullin A, Yilmaz S, Tsioga M, Zeiher AM, Spyridopoulos I: **Role of N-terminal**  
21  
22 **pro-brain natriuretic peptide and cystatin C to estimate renal function in patients with and without**  
23  
24 **heart failure.** *The American journal of cardiology* 2009, **103(8):1128-1133.**  
25  
26  
27 24. Ruan ZB, Zhu L, Yin YG, Chen GC: **Cystatin C, N-terminal probrain natriuretic peptides and**  
28  
29 **outcomes in acute heart failure with acute kidney injury in a 12-month follow-up: Insights into**  
30  
31 **the cardiorenal syndrome.** *Journal of research in medical sciences : the official journal of Isfahan*  
32  
33 *University of Medical Sciences* 2014, **19(5):404-409.**  
34  
35  
36 25. Tung YC, Chang CH, Chen YC, Chu PH: **Combined biomarker analysis for risk of acute kidney**  
37  
38 **injury in patients with ST-segment elevation myocardial infarction.** *PloS one* 2015,  
39  
40 **10(4):e0125282.**  
41  
42  
43 26. Wang C, Han S, Tong F, Li Y, Li Z, Sun Z: **Predictive Value of the Serum Cystatin C/Prealbumin**  
44  
45 **Ratio in Combination With NT-proBNP Levels for Long-Term Prognosis in Chronic Heart Failure**  
46  
47 **Patients: A Retrospective Cohort Study.** *Frontiers in cardiovascular medicine* 2021, **8:684919.**  
48  
49  
50 27. von Elm E, Altman DG, Egger M, Pocock SJ, Gøtzsche PC, Vandenbroucke JP: **The**  
51  
52 **Strengthening the Reporting of Observational Studies in Epidemiology (STROBE) statement:**  
53  
54  
55  
56  
57  
58  
59  
60

- 1  
2  
3  
4 **guidelines for reporting observational studies.** *Annals of internal medicine* 2007, **147**(8):573-577.
- 5  
6  
7 28. Bossuyt PM, Reitsma JB, Bruns DE, Gatsonis CA, Glasziou PP, Irwig LM, Lijmer JG, Moher D,  
8  
9 Rennie D, de Vet HC: **Toward complete and accurate reporting of studies of diagnostic accuracy:**  
10  
11 **the STARD initiative.** *Academic radiology* 2003, **10**(6):664-669.
- 12  
13  
14 29. Levey AS, Stevens LA, Schmid CH, Zhang YL, Castro AF, 3rd, Feldman HI, Kusek JW, Eggers  
15  
16 P, Van Lente F, Greene T *et al.* **A new equation to estimate glomerular filtration rate.** *Annals of*  
17  
18 *internal medicine* 2009, **150**(9):604-612.
- 19  
20  
21  
22 30. Endre ZH, Walker RJ, Pickering JW, Shaw GM, Frampton CM, Henderson SJ, Hutchison R,  
23  
24 Mehrtens JE, Robinson JM, Schollum JB *et al.* **Early intervention with erythropoietin does not**  
25  
26 **affect the outcome of acute kidney injury (the EARLYARF trial).** *Kidney international* 2010,  
27  
28 **77**(11):1020-1030.
- 29  
30  
31  
32 31. DeLong ER, DeLong DM, Clarke-Pearson DL: **Comparing the areas under two or more**  
33  
34 **correlated receiver operating characteristic curves: a nonparametric approach.** *Biometrics* 1988,  
35  
36 **44**(3):837-845.
- 37  
38  
39  
40 32. Youden WJ: **Index for rating diagnostic tests.** *Cancer* 1950, **3**(1):32-35.
- 41  
42  
43 33. Cook NR: **Statistical evaluation of prognostic versus diagnostic models: beyond the ROC curve.**  
44  
45 *Clinical chemistry* 2008, **54**(1):17-23.
- 46  
47  
48 34. Pencina MJ, D'Agostino RB, Sr., D'Agostino RB, Jr., Vasan RS: **Evaluating the added predictive**  
49  
50 **ability of a new marker: from area under the ROC curve to reclassification and beyond.** *Statistics*  
51  
52 *in medicine* 2008, **27**(2):157-172; discussion 207-112.
- 53  
54  
55  
56 35. Albert C, Haase M, Albert A, Kropf S, Bellomo R, Westphal S, Westerman M, Braun-Dullaeus  
57  
58 RC, Haase-Fielitz A: **Urinary Biomarkers may Complement the Cleveland Score for Prediction**  
59  
60

- 1  
2  
3  
4 **of Adverse Kidney Events After Cardiac Surgery: A Pilot Study.** *Annals of laboratory medicine*  
5  
6 2020, **40**(2):131-141.  
7  
8
- 9 36. Xu X, Nie S, Liu Z, Chen C, Xu G, Zha Y, Qian J, Liu B, Han S, Xu A *et al.* **Epidemiology and**  
10  
11 **Clinical Correlates of AKI in Chinese Hospitalized Adults.** *Clinical journal of the American*  
12  
13 *Society of Nephrology : CJASN* 2015, **10**(9):1510-1518.  
14  
15
- 16 37. Xu X, Nie S, Zhang A, Mao J, Liu HP, Xia H, Xu H, Liu Z, Feng S, Zhou W *et al.* **Acute Kidney**  
17  
18 **Injury among Hospitalized Children in China.** *Clinical journal of the American Society of*  
19  
20 *Nephrology : CJASN* 2018, **13**(12):1791-1800.  
21  
22
- 23 38. Martins CB, De Bels D, Honore PM, Redant S: **Early Prediction of Acute Kidney Injury by**  
24  
25 **Machine Learning: Should We Add the Urine Output Criterion to Improve this New Tool?** *Journal*  
26  
27 *of translational internal medicine* 2020, **8**(4):201-202.  
28  
29
- 30 39. Chen C, Yang X, Lei Y, Zha Y, Liu H, Ma C, Tian J, Chen P, Yang T, Hou FF: **Urinary Biomarkers**  
31  
32 **at the Time of AKI Diagnosis as Predictors of Progression of AKI among Patients with Acute**  
33  
34 **Cardiorenal Syndrome.** *Clinical journal of the American Society of Nephrology : CJASN* 2016,  
35  
36 **11**(9):1536-1544.  
37  
38
- 39 40. Yang X, Chen C, Teng S, Fu X, Zha Y, Liu H, Wang L, Tian J, Zhang X, Liu Y *et al.* **Urinary**  
40  
41 **Matrix Metalloproteinase-7 Predicts Severe AKI and Poor Outcomes after Cardiac Surgery.**  
42  
43 *Journal of the American Society of Nephrology : JASN* 2017, **28**(11):3373-3382.  
44  
45
- 46 41. Daniels LB, Maisel AS: **Natriuretic peptides.** *Journal of the American College of Cardiology* 2007,  
47  
48 **50**(25):2357-2368.  
49  
50
- 51 42. Gambardella I, Gaudino M, Ronco C, Lau C, Ivascu N, Girardi LN: **Congestive kidney failure in**  
52  
53 **cardiac surgery: the relationship between central venous pressure and acute kidney injury.**  
54  
55  
56  
57  
58  
59  
60



- 1  
2  
3  
4 *Interactive cardiovascular and thoracic surgery* 2016, **23**(5):800-805.
- 5  
6  
7 43. Redant S, Honoré PM, De Bels D: **Fifty Shades of Central Venous Pressure in the Cardiorenal**  
8  
9 **Syndrome.** *Journal of translational internal medicine* 2020, **8**(1):1-2.
- 10  
11  
12 44. Li X, Liu C, Mao Z, Qi S, Song R, Zhou F: **Brain Natriuretic Peptide for Predicting Contrast-**  
13  
14 **Induced Acute Kidney Injury in Patients with Acute Coronary Syndrome Undergoing Coronary**  
15  
16 **Angiography: A Systematic Review and Meta-Analysis.** *Journal of interventional cardiology*  
17  
18 2020, **2020**:1035089.
- 19  
20  
21  
22 45. Lin KY, Wu ZY, You ZB, Zheng WP, Lin CJ, Jiang H, Ruan JM, Guo YS, Zhu PL: **Pre-Procedural**  
23  
24 **N-Terminal Pro-B Type Natriuretic Peptide Predicts Contrast-Induced Acute Kidney Injury and**  
25  
26 **Long-Term Outcome in Elderly Patients After Elective Percutaneous Coronary Intervention.**  
27  
28 *International heart journal* 2018, **59**(5):926-934.
- 29  
30  
31  
32 46. Greenberg JH, Parsons M, Zappitelli M, Jia Y, Thiessen-Philbrook HR, Devarajan P, Everett  
33  
34 AD, Parikh CR: **Cardiac Biomarkers for Risk Stratification of Acute Kidney Injury After Pediatric**  
35  
36 **Cardiac Surgery.** *The Annals of thoracic surgery* 2021, **111**(1):191-198.
- 37  
38  
39  
40 47. Patel UD, Garg AX, Krumholz HM, Shlipak MG, Coca SG, Sint K, Thiessen-Philbrook H, Koyner  
41  
42 JL, Swaminathan M, Passik CS *et al.* **Preoperative serum brain natriuretic peptide and risk of**  
43  
44 **acute kidney injury after cardiac surgery.** *Circulation* 2012, **125**(11):1347-1355.
- 45  
46  
47  
48 48. Zhao BC, Zhuang PP, Lei SH, Qiu SD, Yang X, Li C, Liu WF, Liu KX: **Pre-operative N-terminal**  
49  
50 **pro-B-type natriuretic peptide for prediction of acute kidney injury after noncardiac surgery: A**  
51  
52 **retrospective cohort study.** *European journal of anaesthesiology* 2021, **38**(6):591-599.
- 53  
54  
55  
56 49. Basu RK, Wong HR, Krawczeski CD, Wheeler DS, Manning PB, Chawla LS, Devarajan P,  
57  
58 Goldstein SL: **Combining functional and tubular damage biomarkers improves diagnostic**  
59  
60



- 1  
2  
3  
4 precision for acute kidney injury after cardiac surgery. *Journal of the American College of*  
5  
6 *Cardiology* 2014, **64**(25):2753-2762.  
7  
8  
9 50. Yang CH, Chang CH, Chen TH, Fan PC, Chang SW, Chen CC, Chu PH, Chen YT, Yang HY,  
10  
11 Yang CW *et al.* **Combination of Urinary Biomarkers Improves Early Detection of Acute Kidney**  
12  
13 **Injury in Patients With Heart Failure.** *Circulation journal : official journal of the Japanese*  
14  
15 *Circulation Society* 2016, **80**(4):1017-1023.  
16  
17  
18 51. Deng Y, Wang L, Hou Y, Ma J, Chi R, Ye H, Zhai Y, Zhang D, Gao L, Hu L *et al.* **The influence**  
19  
20 **of glycemic status on the performance of cystatin C for acute kidney injury detection in the**  
21  
22 **critically ill.** *Renal failure* 2019, **41**(1):139-149.  
23  
24  
25 52. Liang S, Shi M, Bai Y, Deng Y, Fang M, Li J, Wu Y, Peng W, Hou Y, Fang H *et al.* **The effect of**  
26  
27 **glucocorticoids on serum cystatin C in identifying acute kidney injury: a propensity-matched**  
28  
29 **cohort study.** *BMC nephrology* 2020, **21**(1):519.  
30  
31  
32 53. Zhang D, Gao L, Ye H, Chi R, Wang L, Hu L, Ouyang X, Hou Y, Deng Y, Long Y *et al.* **Impact**  
33  
34 **of thyroid function on cystatin C in detecting acute kidney injury: a prospective, observational**  
35  
36 **study.** *BMC nephrology* 2019, **20**(1):41.  
37  
38  
39  
40  
41  
42  
43  
44  
45  
46  
47  
48  
49  
50  
51  
52  
53  
54  
55  
56  
57  
58  
59  
60

### Figure legends

**Figure 1.** Flowchart for patient selection. ICU, intensive care unit; AKI, acute kidney injury; ESRD, end-stage renal disease; RRT, renal replacement therapy.

**Figure 2.** ROC analysis of the two biomarkers for AKI detection. Among 1222 patients, 256 were diagnosed as AKI. ROC, receiver operating characteristic; AKI, acute kidney injury; AUC, area under the receiver operating characteristic curve; CI, confidence interval; NT-proBNP, N-terminal pro-B-type natriuretic peptide; sCysC, serum cystatin C.

**Figure 3.** ROC analysis when two biomarkers were added to the clinical model for AKI detection. Among 1222 patients, 256 were diagnosed as AKI. ROC, receiver operating characteristic; AKI, acute kidney injury; AUC, area under the receiver operating characteristic curve; CI, confidence interval; sCysC, serum cystatin C; NT-proBNP, N-terminal pro-B-type natriuretic peptide.

1  
2  
3  
4  
5  
6  
7  
8  
9  
10  
11  
12  
13  
14  
15  
16  
17  
18  
19  
20  
21  
22  
23  
24  
25  
26  
27  
28  
29  
30  
31  
32  
33  
34  
35  
36  
37  
38  
39  
40  
41  
42  
43  
44  
45  
46  
47  
48  
49  
50  
51  
52  
53  
54  
55  
56  
57  
58  
59  
60

For peer review only



Flowchart for patient selection. ICU, intensive care unit; AKI, acute kidney injury; ESRD, end-stage renal disease; RRT, renal replacement therapy.

170x103mm (144 x 144 DPI)



ROC analysis of the two biomarkers for AKI detection. Among 1222 patients, 256 were diagnosed as AKI. ROC, receiver operating characteristic; AKI, acute kidney injury; AUC, area under the receiver operating characteristic curve; CI, confidence interval; NT-proBNP, N-terminal pro-B-type natriuretic peptide; sCysC, serum cystatin C.

165x132mm (96 x 96 DPI)



ROC analysis when two biomarkers were added to the clinical model for AKI detection. Among 1222 patients, 256 were diagnosed as AKI. ROC, receiver operating characteristic; AKI, acute kidney injury; AUC, area under the receiver operating characteristic curve; CI, confidence interval; sCysC, serum cystatin C; NT-proBNP, N-terminal pro-B-type natriuretic peptide.

165x132mm (96 x 96 DPI)

## TRIPOD Checklist: Prediction Model Development

| Section/Topic                | Item | Checklist Item                                                                                                                                                                                        | Page         |
|------------------------------|------|-------------------------------------------------------------------------------------------------------------------------------------------------------------------------------------------------------|--------------|
| <b>Title and abstract</b>    |      |                                                                                                                                                                                                       |              |
| Title                        | 1    | Identify the study as developing and/or validating a multivariable prediction model, the target population, and the outcome to be predicted.                                                          | 1            |
| Abstract                     | 2    | Provide a summary of objectives, study design, setting, participants, sample size, predictors, outcome, statistical analysis, results, and conclusions.                                               | 4-5          |
| <b>Introduction</b>          |      |                                                                                                                                                                                                       |              |
| Background and objectives    | 3a   | Explain the medical context (including whether diagnostic or prognostic) and rationale for developing or validating the multivariable prediction model, including references to existing models.      | 7-8          |
|                              | 3b   | Specify the objectives, including whether the study describes the development or validation of the model or both.                                                                                     | 8            |
| <b>Methods</b>               |      |                                                                                                                                                                                                       |              |
| Source of data               | 4a   | Describe the study design or source of data (e.g., randomized trial, cohort, or registry data), separately for the development and validation data sets, if applicable.                               | 9-10         |
|                              | 4b   | Specify the key study dates, including start of accrual; end of accrual; and, if applicable, end of follow-up.                                                                                        | 9-10         |
| Participants                 | 5a   | Specify key elements of the study setting (e.g., primary care, secondary care, general population) including number and location of centres.                                                          | 9            |
|                              | 5b   | Describe eligibility criteria for participants.                                                                                                                                                       | 9            |
|                              | 5c   | Give details of treatments received, if relevant.                                                                                                                                                     | NA           |
| Outcome                      | 6a   | Clearly define the outcome that is predicted by the prediction model, including how and when assessed.                                                                                                | 10           |
|                              | 6b   | Report any actions to blind assessment of the outcome to be predicted.                                                                                                                                | NA           |
| Predictors                   | 7a   | Clearly define all predictors used in developing or validating the multivariable prediction model, including how and when they were measured.                                                         | 9-10         |
|                              | 7b   | Report any actions to blind assessment of predictors for the outcome and other predictors.                                                                                                            | NA           |
| Sample size                  | 8    | Explain how the study size was arrived at.                                                                                                                                                            | 9            |
| Missing data                 | 9    | Describe how missing data were handled (e.g., complete-case analysis, single imputation, multiple imputation) with details of any imputation method.                                                  | 9            |
| Statistical analysis methods | 10a  | Describe how predictors were handled in the analyses.                                                                                                                                                 | 9            |
|                              | 10b  | Specify type of model, all model-building procedures (including any predictor selection), and method for internal validation.                                                                         | 11-12        |
|                              | 10d  | Specify all measures used to assess model performance and, if relevant, to compare multiple models.                                                                                                   | 12           |
| Risk groups                  | 11   | Provide details on how risk groups were created, if done.                                                                                                                                             | 11-12        |
| <b>Results</b>               |      |                                                                                                                                                                                                       |              |
| Participants                 | 13a  | Describe the flow of participants through the study, including the number of participants with and without the outcome and, if applicable, a summary of the follow-up time. A diagram may be helpful. | 13, figure 1 |
|                              | 13b  | Describe the characteristics of the participants (basic demographics, clinical features, available predictors), including the number of participants with missing data for predictors and outcome.    | 13           |
| Model development            | 14a  | Specify the number of participants and outcome events in each analysis.                                                                                                                               | 14-15        |
|                              | 14b  | If done, report the unadjusted association between each candidate predictor and outcome.                                                                                                              | 14           |
| Model specification          | 15a  | Present the full prediction model to allow predictions for individuals (i.e., all regression coefficients, and model intercept or baseline survival at a given time point).                           | 13-15        |
|                              | 15b  | Explain how to use the prediction model.                                                                                                                                                              | 14           |
| Model performance            | 16   | Report performance measures (with CIs) for the prediction model.                                                                                                                                      | 14-15        |
| <b>Discussion</b>            |      |                                                                                                                                                                                                       |              |
| Limitations                  | 18   | Discuss any limitations of the study (such as nonrepresentative sample, few events per predictor, missing data).                                                                                      | 23-24        |
| Interpretation               | 19b  | Give an overall interpretation of the results, considering objectives, limitations, and results from similar studies, and other relevant evidence.                                                    | 21-23        |
| Implications                 | 20   | Discuss the potential clinical use of the model and implications for future research.                                                                                                                 | 21-24        |
| <b>Other information</b>     |      |                                                                                                                                                                                                       |              |
| Supplementary information    | 21   | Provide information about the availability of supplementary resources, such as study protocol, Web calculator, and data sets.                                                                         | 25-32        |
| Funding                      | 22   | Give the source of funding and the role of the funders for the present study.                                                                                                                         | 27           |

We recommend using the TRIPOD Checklist in conjunction with the TRIPOD Explanation and Elaboration document.
